# Supplementary material
Source: publisher figshare collection journal article supplement (https://rs.figshare.com/ndownloader/files/13757102)
Supplement: Supplementary file 1 [file 13757102]

## Sheet: Figure labelling
Table S9. Down-regulated genes in local and systemic leaves
Genes in different regions of the Venn diagram are shown in specific Excel sheets labeled with the corresponding letters
FC=fold changes

## Sheet: a
Gene ID	Discription	log2 (FC) 6 WW Loc
GRMZM5G871891	NA	-1.00138
GRMZM2G405313	glutathione s- n-terminal domain containing expressed	-1.00154
GRMZM2G048919	sterile alpha motif domain-containing protein	-1.00154
GRMZM2G344630	gtp binding protein	-1.0018
AC205251.3_FG002	NA	-1.00181
GRMZM2G703586	uncharacterized protein LOC100382833	-1.00194
GRMZM5G891837	NA	-1.00196
GRMZM2G068826	uncharacterized protein LOC100277874	-1.00205
GRMZM2G036755	NA	-1.00208
GRMZM5G849455	NA	-1.00246
AC196954.2_FG007	NA	-1.00287
GRMZM2G588953	NA	-1.00288
GRMZM2G011465	NA	-1.00289
GRMZM2G490099	NA	-1.00295
GRMZM5G866271	thioredoxin domain-containing protein 9	-1.00296
GRMZM2G516965	NA	-1.00297
GRMZM2G080792	NA	-1.00299
GRMZM2G038640	hypothetical protein	-1.00303
GRMZM2G026990	NA	-1.00309
GRMZM2G150804	NA	-1.00319
AC210416.3_FG003	NA	-1.0037
GRMZM2G080058	NA	-1.00376
GRMZM2G075456	calcium binding ef-hand protein	-1.00377
GRMZM2G077727	NA	-1.00388
GRMZM2G371159	ralf precursor	-1.00392
GRMZM2G024585	NA	-1.00401
GRMZM2G390603	NA	-1.00415
GRMZM2G402417	jasmonate-induced protein	-1.0043
GRMZM5G808847	nedd8-activating enzyme e1 regulatory subunit	-1.00432
GRMZM5G803355	NA	-1.00439
GRMZM2G165914	NA	-1.00443
GRMZM2G318474	NA	-1.00446
AC193426.3_FG003	NA	-1.00451
GRMZM2G057011	wrky dna-binding protein	-1.00463
GRMZM5G817495	NA	-1.00486
GRMZM2G321220	pdi-like protein	-1.00489
GRMZM2G457812	NA	-1.00523
GRMZM2G168148	NA	-1.00528
GRMZM2G034594	NA	-1.0054
GRMZM2G177934	chemocyanin precursor	-1.00561
AC214496.3_FG008	NA	-1.00577
GRMZM2G072645	NA	-1.00578
GRMZM2G058081	retrotransposon protein sine subclass precursor	-1.00603
GRMZM2G033406	uncharacterized protein LOC100216935	-1.00603
GRMZM2G161742	NA	-1.00631
GRMZM2G332505	amino acid expressed	-1.00718
GRMZM2G061973	NA	-1.00745
GRMZM2G074818	sister chromatid cohesion 1 protein 3	-1.00768
GRMZM2G094404	guanylyl cyclase	-1.00778
GRMZM2G704174	NA	-1.0079
GRMZM2G108912	phospholipase d delta-like	-1.00809
GRMZM2G070615	NA	-1.00836
GRMZM2G055873	NA	-1.00852
GRMZM2G415476	NA	-1.00884
GRMZM2G515150	phosphoacetylglucosamine mutase-like	-1.00888
GRMZM2G073272	wrky transcription factor 11	-1.00898
GRMZM2G447976	btb poz domain-containing protein at2g13690-like	-1.00899
GRMZM2G066983	NA	-1.00913
GRMZM2G027697	myb transcription factor	-1.0094
GRMZM2G517884	cdpk-related protein kinase	-1.00958
GRMZM2G406821	NA	-1.00974
GRMZM2G001713	aspartic proteinase	-1.00978
GRMZM2G070322	systemin receptor sr160 precursor	-1.01012
GRMZM2G154828	cytochrome p450	-1.01034
AC210027.3_FG003	NA	-1.01034
GRMZM5G860978	NA	-1.01085
GRMZM2G481231	pentatricopeptide repeat-containing protein	-1.0109
GRMZM2G084947	hypothetical protein SORBIDRAFT_10g021910	-1.01101
GRMZM2G324869	NA	-1.01134
GRMZM2G702110	NA	-1.01142
GRMZM2G160364	uncharacterized protein LOC100502443	-1.01147
GRMZM2G043353	NA	-1.01162
GRMZM2G322878	NA	-1.01187
GRMZM5G807738	NA	-1.01206
GRMZM2G488594	NA	-1.01237
GRMZM2G016707	uncharacterized protein LOC100382421	-1.01283
AC213398.3_FG006	NA	-1.01292
AC186287.7_FG005	NA	-1.01366
GRMZM2G090435	NA	-1.01395
AC194017.3_FG001	NA	-1.01431
GRMZM2G169121	by genscan and genefinder	-1.01457
GRMZM2G039618	NA	-1.01533
GRMZM2G033977	NA	-1.01542
GRMZM2G417496	formin-like protein 20-like	-1.01743
GRMZM2G109733	NA	-1.01805
GRMZM5G853943	NA	-1.01806
GRMZM2G178593	NA	-1.01806
AC213399.3_FG009	NA	-1.01812
GRMZM2G082051	NA	-1.01816
GRMZM2G462717	ribosomal protein l34e-like protein	-1.01816
GRMZM2G494515	NA	-1.01843
GRMZM2G085934	kda class ii heat shock protein	-1.01844
GRMZM2G397901	NA	-1.01845
GRMZM2G400647	NA	-1.01845
GRMZM2G148123	NA	-1.01845
GRMZM2G385560	NA	-1.01846
AC197340.3_FG010	NA	-1.01847
GRMZM2G445175	NA	-1.01848
GRMZM2G405170	b3 domain-containing transcription factor nga2	-1.01848
GRMZM2G078667	disease resistance response protein	-1.01849
AC226199.2_FG002	NA	-1.01849
GRMZM2G569625	NA	-1.01849
GRMZM2G001262	NA	-1.01851
GRMZM2G376029	NA	-1.01853
GRMZM2G321076	calcium-transporting atpase endoplasmic reticulum-type-like	-1.01853
GRMZM2G103926	NA	-1.01853
GRMZM2G333059	NA	-1.01853
GRMZM2G011796	NA	-1.01854
GRMZM2G061332	NA	-1.01854
GRMZM2G521296	NA	-1.01854
GRMZM2G451254	histone h3	-1.01855
GRMZM2G362993	NA	-1.01855
GRMZM2G078250	NA	-1.01855
GRMZM2G063824	carbohydrate transporter sugar porter	-1.01856
GRMZM2G146018	gras family transcription factor	-1.01856
GRMZM2G129112	NA	-1.01856
GRMZM2G133215	NA	-1.01856
GRMZM2G114113	hypothetical protein OsI_08581	-1.01857
GRMZM2G113554	protein weak chloroplast movement under blue light 1-like	-1.01857
GRMZM2G381782	beta-glucan-binding protein	-1.01857
GRMZM2G039431	probable lrr receptor-like serine threonine-protein kinase at4g26540-like	-1.01858
GRMZM2G499381	NA	-1.01862
GRMZM5G816602	NA	-1.01866
GRMZM2G355970	NA	-1.01872
GRMZM2G131551	NA	-1.01906
GRMZM2G345086	NA	-1.01912
GRMZM2G170383	NA	-1.01956
GRMZM2G114398	uncharacterized protein LOC100277815	-1.02016
GRMZM2G571140	NA	-1.02038
GRMZM2G094352	transcription factor tga4	-1.02053
GRMZM2G580993	NA	-1.02082
GRMZM5G826024	NA	-1.02084
AC155434.2_FG002	NA	-1.02091
GRMZM2G004732	dna binding protein	-1.02105
GRMZM2G350001	uncharacterized protein LOC100383899 precursor	-1.0211
GRMZM2G015156	NA	-1.02151
AC190533.4_FG006	NA	-1.02174
GRMZM5G847664	NA	-1.02176
AC204944.3_FG004	NA	-1.02178
GRMZM2G038103	NA	-1.02189
AC199559.4_FG001	NA	-1.02189
GRMZM2G503408	NA	-1.02198
GRMZM2G173406	NA	-1.02208
AC211359.2_FG002	NA	-1.0223
GRMZM2G534217	NA	-1.02243
GRMZM2G432246	NA	-1.02251
GRMZM2G106482	NA	-1.02253
GRMZM2G159307	atp binding	-1.0227
GRMZM2G470731	uncharacterized protein LOC100277262	-1.02278
GRMZM2G505402	NA	-1.02301
AC211010.3_FG003	NA	-1.02303
GRMZM2G143397	---NA---	-1.02311
GRMZM2G065340	NA	-1.02316
GRMZM2G138479	NA	-1.02329
GRMZM2G559355	NA	-1.02331
GRMZM5G820883	NA	-1.0234
GRMZM2G411569	alpha- -glucosyltransferase	-1.02348
GRMZM2G301546	s-adenosyl-l-methionine-dependent methyltransferase-like protein	-1.02356
GRMZM2G095838	NA	-1.02356
GRMZM5G859785	NA	-1.02356
AC202877.3_FG002	NA	-1.02358
GRMZM2G391339	uncharacterized protein LOC100382101	-1.02361
GRMZM2G328831	NA	-1.02361
GRMZM2G132882	pyrophosphate--fructose 6-phosphate 1-phosphotransferase alpha subunit	-1.02363
GRMZM2G338924	NA	-1.02366
GRMZM2G049372	sugar transport protein 5-like	-1.02369
GRMZM2G103517	NA	-1.02369
GRMZM2G034894	NA	-1.02371
GRMZM2G175521	NA	-1.02373
GRMZM2G302873	stachyose synthase	-1.02374
GRMZM2G401075	dna helicase	-1.02376
AC185417.3_FG003	NA	-1.02377
AC209050.3_FG001	NA	-1.0238
AC207395.3_FG003	NA	-1.02392
AC210974.4_FG003	NA	-1.02399
GRMZM2G505545	NA	-1.02423
GRMZM2G155127	NA	-1.02433
GRMZM2G413055	adenylate kinase	-1.02433
AC186897.4_FG015	NA	-1.02434
GRMZM2G136337	NA	-1.02443
GRMZM2G170034	lim domain-containing protein	-1.02458
GRMZM2G017622	NA	-1.02496
GRMZM2G158191	protein binding protein	-1.02502
GRMZM2G108214	NA	-1.02516
GRMZM2G369701	tpr repeat-containing thioredoxin ttl1-like	-1.02523
GRMZM2G092679	ring finger protein	-1.02535
GRMZM2G361108	NA	-1.0259
GRMZM5G841371	NA	-1.02687
GRMZM2G166804	uncharacterized protein LOC100383964	-1.02757
GRMZM2G422670	phospholipase c 3-like	-1.02783
GRMZM5G886969	unknown	-1.02815
GRMZM2G154801	NA	-1.02829
GRMZM2G164814	amino acid carrier	-1.0285
GRMZM2G089944	formamidase isoform 2	-1.02868
GRMZM2G045914	NA	-1.02905
GRMZM2G105980	NA	-1.02914
GRMZM2G303509	hypothetical protein SORBIDRAFT_04g028580	-1.02928
GRMZM2G080016	NA	-1.02959
GRMZM2G026837	NA	-1.02972
GRMZM2G168332	hypothetical protein SORBIDRAFT_02g029290	-1.02978
GRMZM5G811955	NA	-1.02984
GRMZM2G060605	NA	-1.03043
GRMZM2G112258	NA	-1.03046
GRMZM2G472686	NA	-1.03054
GRMZM2G368171	NA	-1.0318
GRMZM2G469130	NA	-1.03186
AC233751.1_FG002	NA	-1.03189
AC208341.4_FG001	NA	-1.03195
GRMZM5G815895	NA	-1.03216
GRMZM2G430071	NA	-1.03218
GRMZM2G475256	NA	-1.03233
GRMZM2G153041	NA	-1.03268
GRMZM2G481615	NA	-1.03308
GRMZM2G383739	NA	-1.03312
GRMZM2G358537	uncharacterized protein LOC100278037	-1.03313
GRMZM2G033820	phospholipase a2	-1.03328
GRMZM5G804881	bifunctional 3-dehydroquinate dehydratase shikimate chloroplastic-like	-1.03329
GRMZM2G177011	NA	-1.0337
GRMZM2G401009	ring-h2 finger protein atl3c	-1.03426
GRMZM2G420385	NA	-1.03512
GRMZM5G851686	NA	-1.03549
GRMZM2G383864	NA	-1.03573
GRMZM2G009944	hypothetical protein SORBIDRAFT_01g007075	-1.03605
GRMZM2G064224	NA	-1.03686
GRMZM2G393752	NA	-1.03688
GRMZM2G148494	NA	-1.03689
GRMZM5G808836	mdr-like abc transporter	-1.03691
GRMZM2G554700	NA	-1.03692
AC198037.3_FG005	NA	-1.03693
GRMZM2G069357	pyrophosphate-dependent phosphofructokinase alpha subunit	-1.03697
GRMZM2G315267	NA	-1.03709
GRMZM2G327605	zinc finger homeodomain protein 1	-1.03737
GRMZM2G162131	NA	-1.03741
GRMZM2G011892	NA	-1.03747
GRMZM2G444255	NA	-1.03801
GRMZM2G080547	class iii acidic chitinase	-1.03808
GRMZM2G350822	NA	-1.03827
GRMZM2G469103	NA	-1.03827
AC194214.3_FG002	NA	-1.03837
GRMZM2G117057	protein mother of ft and tf 1-like	-1.03844
GRMZM2G071924	cysteinyl-trna synthetase	-1.03851
GRMZM2G346513	transcription factor iia gamma subunit	-1.03866
GRMZM2G009191	NA	-1.0388
AC211666.3_FG005	NA	-1.03888
GRMZM5G887633	NA	-1.03927
GRMZM2G154446	NA	-1.03945
AC206634.3_FG004	NA	-1.03967
GRMZM2G090994	NA	-1.04002
GRMZM2G180603	NA	-1.04005
GRMZM2G148144	snf1-related protein kinase regulatory subunit beta-1	-1.04007
GRMZM2G071339	probable pectinesterase 53-like	-1.04021
GRMZM2G044851	nitrate transporter -like	-1.04121
AC233979.1_FG006	NA	-1.04161
GRMZM2G545741	NA	-1.04192
GRMZM5G842942	NA	-1.04215
GRMZM2G305559	NA	-1.04218
GRMZM5G816042	unknown	-1.04227
GRMZM2G120619	NA	-1.04298
GRMZM2G378949	calcium dependent protein kinase-like protein	-1.04317
GRMZM2G141667	nadh dehydrogenase subunit 2	-1.0432
GRMZM2G551787	NA	-1.04322
GRMZM2G346637	NA	-1.04346
GRMZM2G030106	ribonuclease j-like	-1.0435
AC197255.3_FG001	NA	-1.04442
GRMZM2G561921	NA	-1.04477
GRMZM2G443655	NA	-1.04518
GRMZM2G002918	tbp-associated factor 2	-1.04534
GRMZM2G344903	cytochrome p450	-1.04548
GRMZM2G064503	hypothetical protein SORBIDRAFT_01g004020	-1.04549
GRMZM2G517165	NA	-1.04566
GRMZM2G459599	NA	-1.04569
GRMZM2G161670	uncharacterized protein LOC100383705	-1.04589
GRMZM2G118280	NA	-1.0461
GRMZM2G540909	NA	-1.04626
GRMZM5G831308	arginase 1	-1.04628
GRMZM2G111625	NA	-1.04645
GRMZM2G587160	NA	-1.04654
GRMZM2G078114	phospholipase d delta-like	-1.0473
GRMZM5G808745	NA	-1.04769
GRMZM2G400408	NA	-1.04774
GRMZM2G311780	NA	-1.04776
GRMZM2G386952	probable leucine-rich repeat receptor-like protein kinase at1g35710-like	-1.04803
GRMZM5G893125	uncharacterized protein LOC100275500	-1.04873
GRMZM2G050043	NA	-1.04886
GRMZM2G147399	early nodulin 93	-1.04909
GRMZM2G585526	NA	-1.04938
GRMZM2G075081	zcn4 protein	-1.04938
GRMZM2G589961	NA	-1.04944
GRMZM2G181094	NA	-1.04948
GRMZM2G035521	NA	-1.04951
GRMZM5G853950	zinc knuckle domain containing	-1.04961
GRMZM2G022347	pollen-specific protein c13 precursor	-1.04971
GRMZM2G575467	NA	-1.04974
GRMZM2G358281	NA	-1.05103
AC196185.3_FG001	NA	-1.05164
GRMZM2G180907	NA	-1.05219
GRMZM2G006426	NA	-1.05238
GRMZM5G879085	NA	-1.05265
GRMZM2G580268	NA	-1.05281
GRMZM2G465341	NA	-1.0529
GRMZM2G142152	NA	-1.05293
GRMZM2G435473	NA	-1.05342
GRMZM2G381483	beta- -mannosyltransferase	-1.05349
GRMZM2G475899	histone h3	-1.05362
GRMZM5G803365	hsp20-like chaperone	-1.05373
GRMZM2G047166	NA	-1.05382
GRMZM2G013295	NA	-1.0539
GRMZM2G123063	argonaute protein group	-1.05439
GRMZM2G334954	NA	-1.0547
GRMZM2G471089	wag-2 mads-box transcription partial	-1.05473
GRMZM2G123111	NA	-1.05482
GRMZM5G831895	NA	-1.05523
GRMZM2G700716	importin-beta n-terminal domain containing expressed	-1.05557
GRMZM2G087658	NA	-1.05582
GRMZM2G382512	NA	-1.05618
GRMZM2G374263	photosystem ii protein z	-1.05639
GRMZM2G443712	NA	-1.05644
GRMZM2G434839	dnaj protein	-1.05659
GRMZM2G081380	fimbrin-like protein 2-like	-1.05663
GRMZM5G849284	uncharacterized protein LOC100382236	-1.05663
GRMZM2G135002	f-box domain containing protein	-1.05714
GRMZM2G042133	dnaj protein homolog	-1.05741
GRMZM2G171842	NA	-1.05835
GRMZM2G088153	NA	-1.05877
GRMZM2G560602	NA	-1.05902
GRMZM2G011206	NA	-1.05962
GRMZM2G073922	NA	-1.06003
GRMZM5G857250	NA	-1.06035
GRMZM2G511083	NA	-1.06053
GRMZM2G092825	NA	-1.06083
GRMZM2G561065	NA	-1.06084
GRMZM5G805016	NA	-1.06086
GRMZM2G302171	uncharacterized protein LOC100277362	-1.06107
AC207516.3_FG004	NA	-1.06115
GRMZM2G025332	NA	-1.06117
GRMZM2G447869	NA	-1.06128
GRMZM2G055289	NA	-1.06138
GRMZM2G047762	zinc transporter 2	-1.06144
GRMZM2G153675	protein phosphatase expressed	-1.06157
GRMZM2G459290	hypothetical protein SORBIDRAFT_01g018870	-1.06175
GRMZM2G398124	transcription initiation factor tfiid subunit 9b	-1.06182
GRMZM2G082076	mitogen-activated protein kinase kinase kinase anp1-like	-1.06197
GRMZM2G024871	ethylene-responsive transcription	-1.06253
GRMZM2G028219	peroxidase 16-like	-1.06268
GRMZM2G111423	wax synthase	-1.0631
GRMZM2G462486	NA	-1.06351
GRMZM2G403437	NA	-1.06364
GRMZM2G049681	heat shock -like	-1.06378
AC190585.3_FG001	NA	-1.06382
GRMZM5G813933	plastid rna polymerase sigma factor	-1.06393
GRMZM2G089614	NA	-1.06449
GRMZM2G442041	NA	-1.06531
GRMZM2G403406	NA	-1.06535
GRMZM2G135513	ring-h2 finger protein atl44-like	-1.06535
GRMZM5G851732	NA	-1.06538
GRMZM2G172450	uncharacterized protein LOC100193017	-1.06547
GRMZM5G833998	unknown	-1.06571
GRMZM2G143082	uncharacterized protein LOC100381641	-1.06651
GRMZM2G047650	NA	-1.06671
GRMZM2G044673	NA	-1.06674
GRMZM2G071977	mcb2 protein	-1.06687
GRMZM5G813343	uncharacterized protein LOC100383214	-1.06709
GRMZM2G032339	fruitful-like mads-box transcription factor	-1.06735
GRMZM5G874291	NA	-1.06738
GRMZM2G328707	NA	-1.06758
AC217121.3_FG005	NA	-1.06828
GRMZM2G363429	cytochrome family subfamily polypeptide 1	-1.06847
GRMZM2G548595	NA	-1.0686
GRMZM2G516497	NA	-1.06906
GRMZM2G047299	brain protein 44-like protein	-1.0697
GRMZM2G060029	armadillo beta-catenin repeat	-1.0698
GRMZM2G400092	histone acetyltransferase type b catalytic subunit	-1.06997
GRMZM2G166141	germin protein type 1	-1.06999
GRMZM2G312677	NA	-1.07001
GRMZM2G073649	NA	-1.07071
GRMZM2G350734	NA	-1.07116
GRMZM2G010673	hypothetical protein	-1.07131
GRMZM2G408248	NA	-1.07168
GRMZM2G041961	lichenase-2 precursor	-1.07262
GRMZM2G542227	uncharacterized protein LOC100501668	-1.07355
GRMZM2G437776	NA	-1.07456
GRMZM2G141430	NA	-1.075
GRMZM2G375110	NA	-1.07519
GRMZM2G171210	phytosulfokine receptor precursor	-1.07532
GRMZM2G119494	probable polygalacturonase-like	-1.07555
GRMZM2G338705	NA	-1.07583
GRMZM2G096178	NA	-1.07649
GRMZM2G092558	NA	-1.07669
GRMZM2G146024	NA	-1.07675
GRMZM2G148270	cysteine-rich peptide	-1.07707
GRMZM2G336337	l-ascorbate oxidase precursor	-1.07732
GRMZM2G044834	NA	-1.07777
AC204509.4_FG007	NA	-1.07785
GRMZM5G886909	NA	-1.07819
GRMZM2G476655	NA	-1.07827
GRMZM5G825286	NA	-1.07876
GRMZM5G826020	uncharacterized protein LOC100279853	-1.07942
GRMZM2G500631	NA	-1.07973
GRMZM5G854948	unknown	-1.08023
GRMZM2G002627	transcription factor bhlh111-like	-1.08034
GRMZM2G031120	nac domain ipr003441	-1.08127
AC206780.3_FG004	NA	-1.08166
GRMZM2G026308	NA	-1.08177
GRMZM2G005511	NA	-1.0819
GRMZM2G037413	cellulose synthase	-1.08243
GRMZM2G057138	NA	-1.08307
AC231425.1_FG011	NA	-1.08337
GRMZM2G162537	exonuclease family protein	-1.0836
GRMZM2G087549	NA	-1.08369
GRMZM2G021410	hydrolase -like protein	-1.08408
GRMZM2G166911	NA	-1.08465
GRMZM2G121418	embryogenesis transmembrane	-1.08502
GRMZM2G022442	uncharacterized glycosyltransferase ago61-like	-1.08516
GRMZM2G407379	NA	-1.08523
AC212763.4_FG008	NA	-1.08524
GRMZM2G155274	protein phosphatase 2c family expressed	-1.08527
GRMZM2G062435	NA	-1.08528
GRMZM2G124759	triacylglycerol lipase	-1.08528
GRMZM2G093725	f-box family protein	-1.08541
GRMZM2G125889	NA	-1.08548
GRMZM2G392624	agenet and bromo-adjacent homology domain-containing protein	-1.08551
GRMZM2G058930	selenium binding protein	-1.08551
GRMZM2G035661	uncharacterized protein LOC100381722	-1.08556
GRMZM2G344513	NA	-1.08593
GRMZM2G373730	NA	-1.08613
GRMZM5G809280	NA	-1.08624
GRMZM2G041094	NA	-1.08632
AC233851.1_FG006	NA	-1.08654
GRMZM2G448935	NA	-1.08687
GRMZM2G073234	NA	-1.08736
GRMZM2G030234	NA	-1.08818
GRMZM2G136934	NA	-1.08836
GRMZM5G894683	NA	-1.08852
GRMZM2G571316	NA	-1.0889
GRMZM2G487823	NA	-1.08995
AC206764.4_FG003	NA	-1.09005
GRMZM2G303319	NA	-1.09026
GRMZM2G016330	NA	-1.0905
GRMZM5G891932	hypothetical protein	-1.09062
GRMZM2G513737	uncharacterized protein LOC100381404	-1.09063
GRMZM2G046419	NA	-1.09071
GRMZM2G033313	NA	-1.09073
GRMZM2G038263	NA	-1.09076
GRMZM2G150812	NA	-1.09089
GRMZM2G118313	NA	-1.09094
GRMZM2G089673	hypothetical protein SORBIDRAFT_01g007470	-1.09101
AC194707.3_FG006	NA	-1.09114
GRMZM2G074786	NA	-1.09114
GRMZM2G506681	NA	-1.09132
GRMZM2G332274	NA	-1.09134
GRMZM2G023552	NA	-1.09135
AC208038.3_FG001	NA	-1.09141
GRMZM5G887181	NA	-1.09146
GRMZM2G044113	NA	-1.09155
GRMZM2G154276	NA	-1.09158
GRMZM2G324083	nadh dehydrogenase	-1.09159
GRMZM2G559822	NA	-1.09185
GRMZM2G579390	NA	-1.09271
GRMZM2G509489	NA	-1.09343
GRMZM5G871277	NA	-1.09346
GRMZM2G307928	NA	-1.09358
GRMZM2G549827	NA	-1.09379
GRMZM2G452801	hypothetical protein SORBIDRAFT_03g031300	-1.09388
GRMZM2G323365	NA	-1.09388
GRMZM5G896529	NA	-1.0947
GRMZM2G149940	b3 dna binding domain containing protein	-1.09482
GRMZM5G882216	dna binding	-1.09531
GRMZM2G562741	NA	-1.09535
GRMZM2G138931	NA	-1.09559
GRMZM2G701449	NA	-1.0958
GRMZM2G359542	NA	-1.09601
GRMZM2G419257	starch synthase v precursor	-1.09658
GRMZM2G055859	rna polymerase beta subunit	-1.09716
GRMZM2G076192	NA	-1.09768
GRMZM2G589696	dof-like protein 34	-1.09809
GRMZM2G324172	peptidase family m48 family protein	-1.0981
GRMZM5G800488	laccase 110a	-1.09813
GRMZM5G863208	ribosomal protein s7	-1.09851
GRMZM2G093670	NA	-1.09878
GRMZM5G849499	uncharacterized protein LOC100278067	-1.09925
GRMZM2G139576	NA	-1.09946
GRMZM2G325629	minor allergen	-1.09948
GRMZM2G134721	NA	-1.09959
GRMZM2G071652	NA	-1.10048
AC209768.3_FG005	NA	-1.10057
GRMZM2G159544	glutamate dehydrogenase	-1.10114
GRMZM2G400032	NA	-1.10154
GRMZM5G868600	NA	-1.10163
GRMZM2G129234	integral membrane yip1 family protein	-1.10163
GRMZM5G818643	transcription factor bhlh49-like	-1.10242
GRMZM2G114844	NA	-1.10248
GRMZM2G112100	subtilisin-like protease sdd1-like	-1.10266
GRMZM2G348912	---NA---	-1.10266
GRMZM5G855389	NA	-1.10275
GRMZM2G132489	disulfide oxidoreductase monooxygenase oxidoreductase	-1.10284
GRMZM2G015426	hypothetical protein SORBIDRAFT_04g035480	-1.10288
GRMZM2G060866	anther-specific proline-rich protein apg precursor	-1.10304
AC213378.3_FG004	NA	-1.10322
GRMZM2G148993	NA	-1.1033
GRMZM2G080699	NA	-1.10338
GRMZM2G122384	NA	-1.10345
GRMZM2G425211	unknown	-1.10361
GRMZM2G397920	NA	-1.104
GRMZM2G121398	p-loop containing nucleoside triphosphate hydrolase domain-containing protein	-1.10412
GRMZM2G304897	g-type lectin s-receptor-like serine threonine-protein kinase at1g34300-like	-1.10517
AC192368.3_FG004	NA	-1.10522
GRMZM2G417021	NA	-1.10527
GRMZM2G141436	NA	-1.10533
GRMZM2G411901	NA	-1.10545
GRMZM2G065294	NA	-1.10549
GRMZM2G176600	NA	-1.1057
GRMZM5G835463	NA	-1.10572
GRMZM2G044850	NA	-1.10577
GRMZM2G517720	NA	-1.10631
GRMZM2G437246	NA	-1.10664
GRMZM2G071407	NA	-1.10671
GRMZM2G055791	NA	-1.10671
GRMZM2G111633	NA	-1.10879
AC197101.3_FG003	NA	-1.11049
GRMZM2G569622	NA	-1.11056
GRMZM2G004010	NA	-1.11176
GRMZM2G047187	hippocampus abundant transcript 1	-1.11181
GRMZM2G702239	NA	-1.11227
AC188970.3_FG008	NA	-1.11253
GRMZM2G147270	NA	-1.11277
GRMZM2G327357	hypothetical protein SORBIDRAFT_03g024470	-1.1129
GRMZM2G111028	histone h2a	-1.11341
GRMZM2G578314	tpr repeat-containing thioredoxin ttl1-like	-1.11377
GRMZM2G181266	3-hydroxyacyl- dehydratase pasticcino 2a-like	-1.11408
GRMZM2G125613	NA	-1.11451
GRMZM2G029065	at-hook protein 1	-1.11461
GRMZM2G388266	NA	-1.1151
GRMZM2G389431	NA	-1.11537
GRMZM2G020859	potassium channel akt2 3-like	-1.11645
GRMZM2G536483	NA	-1.11736
AC203748.3_FG002	NA	-1.11795
GRMZM2G120610	NA	-1.11798
GRMZM2G439903	nac domain-containing protein 90-like	-1.11967
AC196776.3_FG002	NA	-1.12039
GRMZM2G381042	NA	-1.12222
GRMZM2G357129	protein kinase	-1.12362
AC217936.4_FG001	NA	-1.12422
GRMZM2G702594	NA	-1.12482
GRMZM2G002128	myb transcription factor	-1.12529
GRMZM2G091285	NA	-1.12676
GRMZM2G463471	actin-depolymerizing factor	-1.1268
GRMZM2G411448	NA	-1.12719
GRMZM5G848523	NA	-1.12796
GRMZM2G036300	NA	-1.12824
GRMZM2G142357	f-box protein interaction domain containing protein	-1.12826
GRMZM2G137176	upf0551 protein c8orf38 mitochondrial-like	-1.12827
AC213398.3_FG002	NA	-1.12848
GRMZM2G180158	NA	-1.12897
GRMZM2G045246	NA	-1.13102
GRMZM2G514161	NA	-1.1324
GRMZM2G342940	NA	-1.13266
GRMZM2G160024	kelch motif family protein	-1.13331
GRMZM2G479703	oligopeptide transporter 7-like	-1.13441
GRMZM2G148374	autoinhibited h+ atpase	-1.13497
GRMZM2G146214	NA	-1.1362
GRMZM2G180697	uncharacterized protein LOC100275224 precursor	-1.13864
GRMZM2G005419	uncharacterized protein LOC100275768	-1.13892
GRMZM2G163748	NA	-1.13943
GRMZM5G871229	NA	-1.14054
GRMZM2G465046	gdsl esterase lipase at1g74460-like	-1.14289
GRMZM2G171223	hypothetical protein SORBIDRAFT_09g027650	-1.1429
GRMZM5G891793	NA	-1.14326
AC213398.3_FG008	NA	-1.14426
GRMZM5G818800	NA	-1.14524
GRMZM2G138750	cytochrome p450 monooxygenase	-1.14762
GRMZM2G064445	NA	-1.14769
GRMZM5G876837	NA	-1.14793
GRMZM2G426511	2-hydroxy-6-oxononadienedioate 2-hydroxy-6-oxononatrienedioate hydrolase-like	-1.14866
GRMZM2G076398	alpha-galactosidase	-1.14944
GRMZM2G487184	NA	-1.15125
GRMZM5G800973	uncharacterized protein LOC100279271	-1.15127
GRMZM2G176579	NA	-1.15164
GRMZM2G424455	NA	-1.15197
GRMZM5G878722	NA	-1.15383
GRMZM2G460571	transcription factor bhlh123-like	-1.15403
GRMZM2G173016	NA	-1.15454
GRMZM2G438652	bzip transcription factor family protein	-1.15614
GRMZM2G116584	calcineurin b-like protein 10	-1.15648
GRMZM2G122595	NA	-1.15658
GRMZM2G388453	leucine aminopeptidase	-1.15742
GRMZM2G033179	NA	-1.16048
GRMZM2G136831	serine threonine-protein kinase wnk (with no lysine)-related protein	-1.16097
GRMZM2G304797	NA	-1.16109
GRMZM2G126402	NA	-1.16154
GRMZM2G483368	NA	-1.16192
GRMZM2G368151	vamp protein sec22	-1.1622
GRMZM2G539212	NA	-1.16239
GRMZM2G083610	NA	-1.16501
AC201809.4_FG001	NA	-1.1652
GRMZM5G825364	NA	-1.16563
GRMZM2G110592	NA	-1.16584
GRMZM2G491437	NA	-1.16629
GRMZM2G326562	NA	-1.16629
GRMZM2G700713	NA	-1.16638
AC204711.3_FG002	NA	-1.16651
GRMZM2G517730	uncharacterized protein LOC100278177	-1.16663
GRMZM2G360851	NA	-1.16672
AC205383.3_FG003	NA	-1.16697
GRMZM2G035805	protein rotundifolia like 7	-1.16711
GRMZM2G123860	endo- -beta-glucanase	-1.16721
GRMZM2G161530	NA	-1.1673
AC207110.3_FG001	NA	-1.16733
GRMZM2G055024	teosinte branched1 protein	-1.16739
GRMZM2G586687	NA	-1.16823
GRMZM2G125871	NA	-1.1684
GRMZM2G317253	NA	-1.16845
GRMZM5G830204	NA	-1.16854
GRMZM2G132696	NA	-1.16955
GRMZM2G054072	NA	-1.16992
GRMZM2G081934	NA	-1.17276
GRMZM2G003138	beta-ketoacyl-coa synthase family protein	-1.17347
GRMZM2G493147	NA	-1.17378
GRMZM2G591673	NA	-1.17395
GRMZM2G067098	NA	-1.17452
GRMZM2G492462	NA	-1.17461
GRMZM2G534756	NA	-1.17625
GRMZM2G105706	NA	-1.17729
GRMZM5G811917	NA	-1.17807
GRMZM2G060525	NA	-1.17883
GRMZM2G062084	kinesin like protein	-1.17886
GRMZM2G487837	NA	-1.18161
GRMZM2G174128	lrr receptor-like serine threonine-protein kinase gso1-like	-1.18164
GRMZM2G087901	sucrose transporter	-1.18278
GRMZM2G010768	inositol-3-phosphate synthase	-1.18355
GRMZM2G486076	NA	-1.18377
GRMZM2G424245	NA	-1.18515
GRMZM2G109431	glycogenin glucosyltransferase	-1.18551
GRMZM2G105441	NA	-1.18763
GRMZM2G313184	peroxidase 47-like	-1.18814
GRMZM2G022799	metacaspase 2	-1.1887
GRMZM2G353446	ubiquitin family protein	-1.19088
GRMZM2G023946	heparan-alpha-glucosaminide n-acetyltransferase-like	-1.19223
GRMZM5G865876	NA	-1.19422
AC195369.3_FG004	NA	-1.19425
GRMZM2G021644	NA	-1.19485
GRMZM2G134619	NA	-1.19752
AC193598.3_FG002	NA	-1.19767
AC210298.2_FG002	NA	-1.1991
GRMZM2G108020	NA	-1.19926
GRMZM2G118587	NA	-1.19932
GRMZM2G154823	NA	-1.19988
GRMZM5G828630	alanine aminotransferase	-1.20078
GRMZM2G175406	pro-resilin precursor	-1.20178
GRMZM2G704389	NA	-1.20231
GRMZM2G346113	zinc finger ccch domain-containing protein 46	-1.20511
GRMZM2G567512	NA	-1.20568
GRMZM2G491399	NA	-1.20592
GRMZM2G123497	NA	-1.20847
GRMZM5G885425	NA	-1.20925
GRMZM2G439799	protein kinase xa21	-1.20997
GRMZM2G479029	NA	-1.21057
GRMZM2G516626	NA	-1.21073
AC190822.2_FG003	NA	-1.21153
GRMZM2G338897	NA	-1.21226
GRMZM2G504151	NA	-1.21339
GRMZM5G806367	NA	-1.21347
GRMZM2G385633	NA	-1.21355
GRMZM5G856599	NA	-1.21478
GRMZM2G566754	NA	-1.21566
GRMZM2G078294	NA	-1.21824
AC213621.5_FG002	NA	-1.22164
GRMZM2G529857	NA	-1.22171
GRMZM2G161627	NA	-1.22228
GRMZM2G110368	hypothetical protein SORBIDRAFT_03g011450	-1.22379
AC206165.3_FG007	NA	-1.2239
AC201957.4_FG004	NA	-1.22424
GRMZM2G178558	lactoylglutathione lyase family protein	-1.22458
GRMZM2G353197	uncharacterized protein LOC100273956	-1.22529
GRMZM2G563732	vps13-like protein	-1.22579
GRMZM2G450044	uncharacterized protein LOC100278192	-1.22717
GRMZM2G028910	nucleic acid binding	-1.22827
GRMZM2G080060	NA	-1.229
GRMZM5G813670	NA	-1.2305
GRMZM2G034499	NA	-1.23078
GRMZM2G172774	brassinosteroid insensitive 1-associated receptor kinase 1 precursor	-1.23189
GRMZM2G415641	NA	-1.23194
GRMZM2G017925	NA	-1.23214
GRMZM2G171736	cryptochrome 1a	-1.23278
GRMZM2G057283	plasma membrane associated protein	-1.23734
GRMZM2G083161	NA	-1.23902
GRMZM2G483500	NA	-1.24051
GRMZM2G015590	NA	-1.24061
GRMZM2G165524	NA	-1.24254
AC194241.2_FG002	NA	-1.24256
GRMZM2G168724	NA	-1.24375
GRMZM2G143586	NA	-1.24692
GRMZM2G070178	gdsl-motif lipase hydrolase family protein	-1.24748
GRMZM2G099427	NA	-1.24812
AC194072.3_FG005	NA	-1.24817
AC216807.3_FG009	NA	-1.24893
GRMZM2G050709	pan domain-containing protein at5g03700-like	-1.25299
AC206680.3_FG014	NA	-1.25359
AC203966.5_FG002	NA	-1.25706
GRMZM2G022820	fh protein nfh2	-1.25802
GRMZM2G175755	plastid ribosomal protein l35	-1.25878
GRMZM2G045239	hypothetical protein SORBIDRAFT_03g039870	-1.25905
GRMZM2G095894	NA	-1.26096
AC187792.3_FG008	NA	-1.26157
GRMZM2G152499	NA	-1.26188
GRMZM2G327192	NA	-1.26263
GRMZM5G865543	electron carrier electron transporter iron ion binding protein	-1.26435
GRMZM2G377847	uncharacterized protein LOC100278899	-1.26456
AC195929.2_FG005	NA	-1.26521
GRMZM2G315594	kinesin family protein	-1.26554
AC190743.3_FG005	NA	-1.26565
GRMZM2G370302	peroxin-3 family protein	-1.26585
GRMZM2G158657	carotenoid cleavage dioxygenase 7	-1.26604
GRMZM2G083961	NA	-1.26606
GRMZM2G092722	NA	-1.26695
GRMZM2G350674	NA	-1.26753
GRMZM5G892708	NA	-1.26852
AC188613.4_FG003	NA	-1.27201
GRMZM2G346071	NA	-1.27348
GRMZM2G038152	kelch motif family protein	-1.27463
GRMZM2G457929	udp-glycosyltransferase 75d1-like	-1.27496
GRMZM5G848733	agc kinase	-1.27527
AC186669.3_FG002	NA	-1.27542
GRMZM2G002225	knos4_orysj ame: full=homeobox protein knotted-1-like 4 ame: full=homeobox protein osh10	-1.27677
AC177837.3_FG007	NA	-1.27698
GRMZM2G110908	serine threonine-protein kinase	-1.27732
GRMZM2G462760	saur25 - auxin-responsive saur family member	-1.27753
AC194965.4_FG004	NA	-1.28015
GRMZM2G037371	NA	-1.28185
AC214267.3_FG004	NA	-1.28188
GRMZM5G828566	NA	-1.2826
GRMZM2G380291	zinc knuckle domain containing	-1.28311
GRMZM2G106445	wound induced protein	-1.28337
GRMZM2G035798	NA	-1.28344
GRMZM2G034896	respiratory burst oxidase homolog protein b-like	-1.28586
GRMZM2G159811	protein phosphatase 2c	-1.28596
GRMZM2G451549	NA	-1.28607
GRMZM2G060057	lsd1-like protein	-1.28873
GRMZM2G001718	NA	-1.28985
GRMZM2G136629	NA	-1.29159
GRMZM2G382900	NA	-1.29218
AC218978.2_FG003	NA	-1.2933
AC190613.3_FG001	NA	-1.29362
GRMZM2G161596	NA	-1.29719
GRMZM5G817018	NA	-1.29852
GRMZM2G158663	NA	-1.30114
GRMZM2G390804	---NA---	-1.30118
GRMZM2G449197	ribonuclease h2 subunit a	-1.30211
GRMZM5G801969	NA	-1.30256
GRMZM2G135062	haus augmin-like complex subunit	-1.30258
GRMZM2G155170	NA	-1.3027
GRMZM2G137535	lichenase-2 precursor	-1.30298
GRMZM2G043575	nudix hydrolase 13	-1.3035
GRMZM2G401979	NA	-1.30617
GRMZM2G405373	NA	-1.30929
AC184782.3_FG004	NA	-1.3103
GRMZM2G324276	core-2 i-branching beta- -n-acetylglucosaminyltransferase family protein	-1.3157
GRMZM2G094532	zein protein-body er membrane protein	-1.31591
AC206198.3_FG001	NA	-1.319
GRMZM2G102961	NA	-1.3208
GRMZM2G400281	zinc finger protein 7-like	-1.32192
GRMZM2G125747	NA	-1.32257
GRMZM2G031310	NA	-1.32426
GRMZM2G178229	cyclin delta-2	-1.3251
AC194863.3_FG007	NA	-1.32525
GRMZM2G106798	sbp transcription factor	-1.32735
GRMZM2G464572	probable ubiquitin-conjugating enzyme e2 24-like	-1.32969
GRMZM2G136039	probable l-type lectin-domain containing receptor kinase -like	-1.33054
GRMZM2G417835	vq motif family protein	-1.33121
AC209378.3_FG005	NA	-1.33122
AC233939.1_FG004	NA	-1.33146
AC216251.3_FG003	NA	-1.33256
GRMZM2G389285	purine permease	-1.33534
GRMZM2G075032	NA	-1.33546
GRMZM2G546830	NA	-1.33717
GRMZM2G124171	NA	-1.33739
GRMZM2G415307	NA	-1.33762
AC218961.2_FG002	NA	-1.33822
AC214493.3_FG004	NA	-1.34059
GRMZM2G112942	pleckstrin homology domain-containing family a member 8-like	-1.34228
GRMZM2G514245	NA	-1.3433
GRMZM2G004886	NA	-1.34355
GRMZM2G079530	NA	-1.34377
GRMZM5G837689	NA	-1.34377
AC194865.2_FG004	NA	-1.3468
GRMZM2G092901	NA	-1.3473
GRMZM5G806886	NA	-1.34747
GRMZM2G115138	NA	-1.34763
GRMZM2G026715	clathrin assembly protein	-1.34816
GRMZM2G096435	oleosin bn-v	-1.34894
GRMZM2G323622	kinesin calponin homology and calcium binding and coiled-coil domain-containing protein	-1.34908
GRMZM2G355420	NA	-1.34997
GRMZM2G061230	peroxidase	-1.35126
GRMZM2G093798	NA	-1.35232
AC212191.4_FG001	NA	-1.3542
AC203862.4_FG001	NA	-1.35586
GRMZM2G475478	NA	-1.35596
GRMZM2G109175	hypothetical protein SORBIDRAFT_09g003010	-1.35642
GRMZM2G045842	NA	-1.35813
GRMZM2G331539	NA	-1.35838
GRMZM2G078461	NA	-1.35861
GRMZM5G817801	NA	-1.35878
GRMZM2G456586	atp-dependent rna helicase mitochondrial-like	-1.35889
GRMZM2G466543	prephenate dehydratase	-1.35917
GRMZM2G456217	cysteine proteinase	-1.36082
GRMZM2G107142	phosphate-responsive 1 family protein	-1.36199
GRMZM2G143599	mob1-like protein	-1.36364
GRMZM2G078072	NA	-1.3642
AC188129.4_FG002	NA	-1.36441
GRMZM2G090965	NA	-1.36485
GRMZM2G395534	hypothetical protein Z273B07_Z409L08.24	-1.3649
GRMZM2G029623	ring-h2 finger protein atl70-like	-1.36571
GRMZM2G160337	NA	-1.36711
GRMZM2G574388	NA	-1.36731
GRMZM2G585847	NA	-1.36857
GRMZM5G890373	NA	-1.3691
GRMZM2G076140	NA	-1.36926
GRMZM2G451746	uncharacterized protein LOC100277599	-1.36941
GRMZM2G447566	ring-h2 finger protein atl32-like	-1.36992
GRMZM2G006636	NA	-1.37065
GRMZM2G179402	NA	-1.37266
GRMZM5G890145	NA	-1.37937
GRMZM2G320298	probable carboxylesterase 15	-1.38108
GRMZM5G879982	NA	-1.38136
GRMZM2G364854	NA	-1.38331
GRMZM2G444775	NA	-1.3838
GRMZM2G081930	nac domain-containing protein 21 22	-1.38955
GRMZM2G116881	hypothetical protein SORBIDRAFT_10g006240	-1.38969
GRMZM2G074244	NA	-1.39101
GRMZM2G498535	NA	-1.39151
GRMZM2G042720	NA	-1.39169
GRMZM2G021973	---NA---	-1.39543
AC211190.4_FG001	NA	-1.39623
GRMZM2G083188	NA	-1.39777
GRMZM2G089574	uncharacterized protein LOC100275145 precursor	-1.39944
AC191750.3_FG004	NA	-1.39946
GRMZM2G559475	NA	-1.40264
GRMZM2G030695	NA	-1.40305
GRMZM2G405955	NA	-1.40315
GRMZM2G002818	cf2-like protein	-1.40412
GRMZM2G370966	NA	-1.40447
GRMZM2G012611	skip interacting protein 8	-1.40787
GRMZM2G107887	NA	-1.40797
GRMZM2G049151	uncharacterized protein LOC100382342	-1.40825
GRMZM2G149646	hypothetical protein	-1.40836
GRMZM2G114149	mitochondrial substrate carrier family protein	-1.40852
GRMZM2G093265	NA	-1.40903
AC204707.4_FG003	NA	-1.40973
GRMZM5G810176	NA	-1.41168
GRMZM2G382747	hypothetical protein SORBIDRAFT_06g022640	-1.41216
GRMZM2G108166	chromatin remodeling 38	-1.4124
GRMZM2G474407	hypothetical protein SORBIDRAFT_01g040700	-1.41388
GRMZM2G493909	NA	-1.41447
AC196997.3_FG001	NA	-1.41448
GRMZM2G124577	unknown	-1.41534
GRMZM5G830938	NA	-1.41677
GRMZM2G380341	40s ribosomal protein s8	-1.41726
AC183788.3_FG002	NA	-1.41729
GRMZM2G155863	NA	-1.41779
GRMZM5G847744	NA	-1.41855
GRMZM2G035632	NA	-1.41962
GRMZM2G084445	uncharacterized protein LOC100277269	-1.42166
GRMZM2G437314	disease resistance gene homolog 9n	-1.42174
GRMZM2G516883	NA	-1.42549
GRMZM2G481352	NA	-1.42678
GRMZM2G434335	NA	-1.42979
GRMZM2G030262	NA	-1.43013
GRMZM2G094502	NA	-1.43238
GRMZM2G149481	auxin influx carrier component	-1.43287
GRMZM5G821944	NA	-1.43503
GRMZM2G169939	NA	-1.43518
GRMZM2G363008	NA	-1.4354
AC204366.3_FG008	NA	-1.4362
GRMZM2G156801	NA	-1.4373
AC204827.3_FG003	NA	-1.4384
GRMZM2G149700	uncharacterized protein LOC100278307	-1.44121
GRMZM2G040676	NA	-1.44923
GRMZM2G104741	NA	-1.44944
GRMZM2G360541	alpha-tubulin	-1.44991
AC215605.2_FG007	NA	-1.45424
GRMZM2G102888	NA	-1.45526
GRMZM2G351870	NA	-1.45653
AC211976.4_FG002	NA	-1.45902
GRMZM2G429842	subtilisin-like protease	-1.46079
GRMZM2G022651	hypothetical protein OsI_00800	-1.46105
GRMZM2G098442	probable salt tolerance-like protein at1g75540-like	-1.46329
GRMZM5G866673	NA	-1.46468
GRMZM2G495846	NA	-1.46632
GRMZM5G875536	NA	-1.46902
AC235543.1_FG003	NA	-1.47136
GRMZM2G077015	non-cyanogenic beta-glucosidase precursor	-1.47688
GRMZM2G305211	14-3-3 protein	-1.47692
GRMZM2G458937	NA	-1.4791
GRMZM2G071691	NA	-1.4823
GRMZM2G438400	hypothetical protein SORBIDRAFT_01g006870	-1.48389
GRMZM5G893200	NA	-1.48609
GRMZM5G896178	NA	-1.48628
AC194349.3_FG004	NA	-1.48628
GRMZM2G124868	NA	-1.48651
GRMZM2G329831	NA	-1.49066
GRMZM2G069925	NA	-1.4909
GRMZM2G122440	NA	-1.49093
GRMZM2G068531	NA	-1.49237
GRMZM2G367483	pyridine nucleotide-disulfide oxidoreductase domain-containing protein	-1.49264
GRMZM2G353828	NA	-1.49323
GRMZM2G070013	hypothetical protein SORBIDRAFT_09g028420	-1.4947
GRMZM2G092822	NA	-1.49541
GRMZM2G370175	NA	-1.49917
GRMZM2G304174	NA	-1.49975
GRMZM2G578045	NA	-1.50392
GRMZM5G807947	NA	-1.50524
GRMZM2G567455	NA	-1.50547
GRMZM2G135175	multidrug resistance	-1.50826
GRMZM2G165101	NA	-1.50935
GRMZM2G131351	NA	-1.51287
GRMZM2G322434	NA	-1.5141
GRMZM2G530729	NA	-1.5165
GRMZM2G703565	nhl repeat containing protein	-1.51815
GRMZM2G404535	NA	-1.51959
AC209765.3_FG001	NA	-1.52025
GRMZM2G547956	NA	-1.52133
GRMZM2G304643	NA	-1.52345
GRMZM2G115499	hypothetical protein SORBIDRAFT_05g001370	-1.52768
GRMZM2G428035	barley stem rust resistance protein	-1.52897
GRMZM2G046952	gem-like protein 4-like	-1.52903
GRMZM2G128929	lactate dehydrogenase	-1.52978
GRMZM2G067298	NA	-1.53044
GRMZM2G460638	NA	-1.53044
GRMZM5G840749	NA	-1.53185
GRMZM2G486869	NA	-1.53329
GRMZM2G375698	NA	-1.53413
GRMZM5G873198	NA	-1.53526
GRMZM5G827611	uncharacterized protein LOC100383790	-1.54123
GRMZM5G805560	NA	-1.5422
GRMZM2G169025	NA	-1.54535
GRMZM2G040698	NA	-1.54776
GRMZM2G488101	degp1	-1.54855
GRMZM2G112628	pre-mrna-splicing factor cwc21-like	-1.5509
GRMZM2G391795	pepper esterase	-1.55216
GRMZM2G104489	uncharacterized protein LOC100272609	-1.55679
AC198650.3_FG003	NA	-1.55791
GRMZM2G068086	NA	-1.5586
AC202145.3_FG001	NA	-1.55939
GRMZM2G467339	aleurone layer morphogenesis protein	-1.5614
GRMZM2G315274	NA	-1.56578
GRMZM2G358650	NA	-1.56614
GRMZM2G006878	retrotransposon protein	-1.56689
GRMZM2G012337	NA	-1.56697
AC209213.4_FG003	NA	-1.56829
GRMZM2G006417	NA	-1.56839
GRMZM2G089588	NA	-1.56857
GRMZM5G891968	NA	-1.56907
AC200314.4_FG002	NA	-1.56932
GRMZM2G438840	leucine-rich repeat receptor-like protein kinase pxl2-like	-1.56978
GRMZM2G481944	NA	-1.56986
GRMZM2G148998	uncharacterized gpi-anchored protein at4g28100-like	-1.57082
GRMZM2G167698	cytochrome p450	-1.57086
GRMZM2G339367	(+)-neomenthol dehydrogenase	-1.5731
GRMZM2G304079	NA	-1.57357
GRMZM2G175910	udp-glycosyltransferase 90a1-like	-1.57521
AC215610.3_FG003	NA	-1.57607
GRMZM2G447071	pan domain-containing protein	-1.57772
GRMZM2G101901	NA	-1.57773
GRMZM5G828157	NA	-1.58002
GRMZM5G875767	NA	-1.58108
GRMZM2G398057	uncharacterized protein LOC100384101	-1.58451
GRMZM2G102014	aspartic proteinase nepenthesin-1-like	-1.58591
GRMZM2G099030	NA	-1.58693
GRMZM2G546002	NA	-1.58705
GRMZM5G883935	NA	-1.58706
GRMZM2G540749	NA	-1.58745
GRMZM2G044429	NA	-1.58769
GRMZM2G071738	NA	-1.58841
AC216187.3_FG001	NA	-1.5894
GRMZM2G587859	NA	-1.59023
GRMZM5G826955	NA	-1.59057
AC218943.3_FG002	NA	-1.59144
GRMZM5G823310	NA	-1.59242
GRMZM2G167445	NA	-1.59411
GRMZM2G396977	NA	-1.59432
GRMZM2G131536	NA	-1.59773
GRMZM2G455885	NA	-1.59856
GRMZM2G118047	NA	-1.59891
AC195220.3_FG006	NA	-1.59906
GRMZM2G449447	hypothetical protein SORBIDRAFT_04g021270	-1.60151
GRMZM2G153879	NA	-1.60266
GRMZM2G035969	NA	-1.60291
GRMZM2G704151	NA	-1.60322
GRMZM2G126083	esterase lipase thioesterase family protein	-1.60359
GRMZM2G315834	NA	-1.604
GRMZM2G002149	uncharacterized membrane protein at3g27390-like	-1.60406
GRMZM2G322468	NA	-1.60444
GRMZM2G082721	v-type proton atpase subunit e-like	-1.60482
GRMZM2G006046	NA	-1.60493
AC186684.4_FG005	NA	-1.60531
GRMZM2G126986	NA	-1.60547
GRMZM2G093999	cslab_orysj ame: full=probable mannan synthase 11 ame: full=cellulose synthase-like protein a11 ame: full= sla11	-1.60654
GRMZM2G027351	calcium-dependent protein kinase	-1.60661
GRMZM5G850640	protein chloroplastic-like	-1.60666
GRMZM2G359183	NA	-1.60725
AC210053.3_FG006	NA	-1.60802
GRMZM2G514072	NA	-1.60821
AC216888.3_FG002	NA	-1.6086
GRMZM2G382029	ribosomal	-1.6087
GRMZM2G702996	uncharacterized protein LOC100272298	-1.61037
GRMZM2G575016	NA	-1.61096
GRMZM2G040332	NA	-1.61131
AC225359.3_FG006	NA	-1.61159
GRMZM2G455240	NA	-1.61197
GRMZM2G047546	65-kda microtubule-associated protein 3-like	-1.61208
GRMZM2G704310	NA	-1.61224
GRMZM2G030102	NA	-1.61297
GRMZM2G052939	uncharacterized protein LOC100273472	-1.61398
AC217358.3_FG007	NA	-1.61411
GRMZM2G313078	gras family transcription factor	-1.61412
GRMZM5G863065	NA	-1.61445
GRMZM2G342815	probable inactive purple acid phosphatase 16-like	-1.61685
GRMZM2G496660	NA	-1.61749
GRMZM2G403601	NA	-1.61859
GRMZM2G703762	NA	-1.61919
GRMZM2G115948	proteasome subunit alpha type 2	-1.61924
GRMZM2G455087	protein binding protein	-1.61963
GRMZM2G419314	NA	-1.62021
GRMZM2G075594	major facilitator superfamily expressed	-1.62082
GRMZM2G335111	beta glucanase	-1.62179
AC205834.3_FG003	NA	-1.62192
GRMZM2G046290	zinc finger protein id1	-1.62206
AC202023.3_FG005	NA	-1.62226
GRMZM2G476357	transcription initiation factor iib	-1.62284
AC203359.3_FG001	NA	-1.62287
GRMZM2G177744	NA	-1.62295
GRMZM2G061339	NA	-1.62425
GRMZM2G141682	NA	-1.62495
GRMZM2G031887	NA	-1.62502
GRMZM2G441417	NA	-1.62535
GRMZM2G101357	NA	-1.62538
GRMZM2G305526	lac10_orysj ame: full=laccase-10 ame: full=benzenediol:oxygen oxidoreductase 10 ame: full=diphenol oxidase 10 ame: full=urishiol oxidase 10 flags: precursor	-1.62543
GRMZM2G026976	f-box protein at3g23950	-1.62562
GRMZM2G105741	NA	-1.62596
GRMZM2G035770	NA	-1.626
AC206223.3_FG005	NA	-1.62695
GRMZM2G110435	NA	-1.62712
GRMZM2G089778	NA	-1.62786
GRMZM2G494655	NA	-1.62869
GRMZM2G512258	NA	-1.62927
AC213847.4_FG008	NA	-1.62927
GRMZM2G370357	aspartic proteinase	-1.62938
GRMZM2G030315	NA	-1.62967
GRMZM2G034447	NA	-1.63001
GRMZM2G057215	NA	-1.63042
GRMZM2G061776	peroxidase atp8a	-1.63099
GRMZM2G178815	probable membrane-associated kinase regulator 4-like	-1.63382
GRMZM2G005314	NA	-1.63425
GRMZM2G100473	targeting protein for xklp2 containing expressed	-1.63561
GRMZM2G163689	NA	-1.63563
GRMZM2G588046	NA	-1.63651
GRMZM2G099948	NA	-1.63823
GRMZM2G059877	pentatricopeptide repeat-containing protein	-1.63833
GRMZM2G056826	embryogenesis transmembrane	-1.64389
AC196711.3_FG003	NA	-1.64396
GRMZM5G828123	uncharacterized protein LOC100280193	-1.64411
GRMZM2G076946	non-cyanogenic beta-glucosidase precursor	-1.64494
AC194259.3_FG002	NA	-1.64557
GRMZM2G048120	NA	-1.64772
GRMZM2G454261	NA	-1.64816
GRMZM2G515259	NA	-1.64841
GRMZM2G103350	NA	-1.64861
GRMZM2G108806	NA	-1.64879
GRMZM2G042199	NA	-1.64879
GRMZM2G052352	calcium calmodulin-dependent protein kinase	-1.64911
GRMZM2G032547	heat shock like protein	-1.64913
GRMZM2G395128	protein chloroplastic-like	-1.6497
GRMZM2G476741	NA	-1.65054
AC210013.4_FG017	NA	-1.6526
GRMZM2G027976	bzip transcription factor	-1.65273
GRMZM2G087267	NA	-1.65279
GRMZM2G482232	start domain-containing protein	-1.65307
GRMZM2G151151	NA	-1.65311
GRMZM2G514986	NA	-1.65353
GRMZM2G454901	NA	-1.65393
GRMZM2G028496	NA	-1.65395
GRMZM2G454085	ribosomal protein l14	-1.65417
GRMZM2G072562	NA	-1.65447
GRMZM2G170441	NA	-1.65508
GRMZM2G557528	NA	-1.65553
GRMZM2G420589	NA	-1.65566
GRMZM2G171349	sec14 cytosolic	-1.65744
GRMZM2G123016	NA	-1.65759
GRMZM2G103725	mitochondrial-processing peptidase subunit alpha-like	-1.65763
GRMZM2G064590	er glycerol-phosphate acyltransferase	-1.65783
GRMZM2G456757	transposon en spm sub-class	-1.65788
GRMZM2G452340	NA	-1.65792
GRMZM2G160578	myosin heavy chain-related protein	-1.65812
GRMZM2G023776	NA	-1.65881
GRMZM2G092733	NA	-1.65917
AC217385.3_FG009	NA	-1.65925
GRMZM2G508239	NA	-1.65945
GRMZM2G112572	NA	-1.65958
AC208625.3_FG002	NA	-1.65995
GRMZM2G532856	NA	-1.66004
GRMZM2G478414	anther-specific proline-rich protein apg	-1.66097
GRMZM2G423478	uncharacterized protein LOC100502429	-1.66135
GRMZM2G052284	NA	-1.66159
GRMZM5G821217	NA	-1.66161
GRMZM2G112278	autophagy-related protein 3	-1.66194
GRMZM2G702313	NA	-1.66349
GRMZM2G424289	NA	-1.66395
GRMZM2G175688	NA	-1.66583
GRMZM5G844749	NA	-1.66585
GRMZM2G313359	NA	-1.66655
GRMZM2G029810	uncharacterized protein LOC100383738	-1.66685
GRMZM2G477032	NA	-1.66719
GRMZM2G382017	NA	-1.66734
GRMZM5G892308	glutaredoxin family protein	-1.66782
GRMZM2G553422	NA	-1.66849
AC186159.3_FG005	NA	-1.66855
GRMZM2G528802	NA	-1.66926
GRMZM2G026787	NA	-1.67029
GRMZM2G393846	NA	-1.67064
GRMZM2G339725	hypothetical protein	-1.67183
GRMZM2G061926	NA	-1.67225
GRMZM2G067600	cold-regulated protein	-1.67265
GRMZM2G026164	NA	-1.67533
GRMZM2G459432	dna binding	-1.67966
GRMZM2G301553	replication protein a 70 kda dna-binding subunit	-1.68114
GRMZM2G490445	NA	-1.68423
GRMZM5G815665	udp-glycosyltransferase 76f1-like	-1.68529
GRMZM2G454637	hypothetical protein SORBIDRAFT_02g018330	-1.68629
GRMZM2G388587	l-ascorbate oxidase precursor	-1.68658
GRMZM5G883008	NA	-1.68922
GRMZM2G309524	NA	-1.69003
GRMZM2G390050	NA	-1.69077
GRMZM2G008283	NA	-1.69124
GRMZM2G372222	NA	-1.69558
GRMZM2G179923	NA	-1.69584
GRMZM2G050137	NA	-1.69593
GRMZM5G830094	NA	-1.69654
GRMZM2G344561	NA	-1.69674
GRMZM5G833688	NA	-1.69747
GRMZM2G377663	chloroplast-targeted copper chaperone protein	-1.6982
GRMZM2G016941	retrotransposon protein	-1.6985
AC211477.3_FG021	NA	-1.69877
GRMZM2G040905	hypothetical protein	-1.69899
AC206853.3_FG002	NA	-1.69904
GRMZM2G049109	serine threonine-protein kinase-like protein at1g28390-like	-1.70114
GRMZM2G417009	phosphatidic acid phosphatase family protein	-1.7012
GRMZM2G471970	dna-binding protein escarola-like	-1.70139
GRMZM2G325543	NA	-1.70209
GRMZM2G020693	NA	-1.70215
AC210607.3_FG010	NA	-1.70221
GRMZM2G157068	calcium-dependent protein kinase	-1.70318
GRMZM2G358619	respiratory burst oxidase-like protein	-1.70369
AC210202.3_FG008	NA	-1.70371
GRMZM2G333377	hypothetical protein SORBIDRAFT_03g013726	-1.70399
GRMZM2G465868	b-keto acyl reductase	-1.7054
GRMZM2G411177	nadp-dependent oxidoreductase expressed	-1.70604
GRMZM2G494156	NA	-1.70634
GRMZM2G085929	NA	-1.70671
GRMZM2G014463	hypothetical protein SORBIDRAFT_05g006020	-1.70694
GRMZM2G380227	protein kinase	-1.70708
GRMZM2G555917	NA	-1.7073
GRMZM5G863207	NA	-1.70744
GRMZM2G544946	NA	-1.70818
GRMZM2G120210	NA	-1.70967
GRMZM2G489623	NA	-1.70997
GRMZM2G327499	NA	-1.71001
GRMZM2G379301	NA	-1.71065
GRMZM2G069122	atp-dependent rna helicase-like	-1.71087
GRMZM2G427409	in between ring finger domain protein	-1.71121
AC203307.4_FG001	NA	-1.71174
GRMZM2G010925	NA	-1.71415
AC205612.3_FG002	NA	-1.71492
GRMZM2G016537	NA	-1.71566
GRMZM2G010453	NA	-1.71592
GRMZM2G416471	uncharacterized protein LOC100277262	-1.71714
GRMZM2G106558	p-type r2r3 myb protein	-1.71732
GRMZM5G868940	NA	-1.71836
GRMZM2G119613	hypothetical protein SORBIDRAFT_05g006080	-1.71865
GRMZM2G067370	NA	-1.71903
GRMZM2G141403	NA	-1.72017
AC203855.2_FG001	NA	-1.72476
GRMZM2G457132	NA	-1.727
GRMZM2G509994	NA	-1.72713
GRMZM2G042510	NA	-1.73031
GRMZM5G874472	NA	-1.73487
GRMZM2G016210	carboxyl-terminal proteinase	-1.73718
GRMZM2G137861	wall-associated receptor kinase 4-like	-1.73783
GRMZM2G057170	NA	-1.73853
GRMZM2G060383	transposon en spm sub-class	-1.74756
GRMZM5G813925	NA	-1.74947
GRMZM2G409795	NA	-1.75034
AC209208.3_FG003	NA	-1.75076
GRMZM2G107479	NA	-1.7515
GRMZM2G538037	NA	-1.75605
GRMZM2G330684	zinc finger (c3hc4-type ring finger)-like protein	-1.75886
GRMZM2G022797	plant if-like protein	-1.76048
GRMZM2G031837	phosphatidylinositol transfer-like protein ii	-1.76388
GRMZM2G136578	traf type zinc finger domain containing 1	-1.76456
GRMZM2G351021	NA	-1.76661
GRMZM2G052357	udp-glucuronate 4-epimerase 6-like	-1.76988
GRMZM2G021573	ap2 domain-containing transcription factor	-1.7699
GRMZM2G410978	NA	-1.77091
GRMZM2G125918	NA	-1.77912
GRMZM2G392181	NA	-1.78325
GRMZM2G347314	hypothetical protein SORBIDRAFT_06g017020	-1.78803
GRMZM2G136616	NA	-1.78957
GRMZM2G348297	NA	-1.79487
AC233910.1_FG009	NA	-1.79948
AC203535.4_FG006	NA	-1.80327
GRMZM2G012809	NA	-1.81111
GRMZM2G072904	NA	-1.81285
GRMZM2G045800	NA	-1.82155
GRMZM2G092188	NA	-1.82511
GRMZM5G804606	NA	-1.83205
GRMZM2G135133	NA	-1.83472
GRMZM5G877866	NA	-1.83546
GRMZM2G322205	NA	-1.83676
GRMZM2G093099	NA	-1.83802
GRMZM5G858064	NA	-1.83825
AC226217.1_FG001	NA	-1.84016
GRMZM2G426067	transferring glycosyl groups	-1.84355
GRMZM2G457733	NA	-1.84911
AC207323.3_FG015	NA	-1.85038
GRMZM5G898358	NA	-1.85231
GRMZM2G060811	uncharacterized protein LOC100276306 precursor	-1.85266
GRMZM2G414192	chlorophyll a-b binding protein	-1.85274
GRMZM5G854330	NA	-1.85464
GRMZM2G530589	uncharacterized protein LOC100274203	-1.86528
GRMZM2G304021	NA	-1.86565
AC217401.3_FG004	NA	-1.86703
GRMZM5G857472	NA	-1.87478
GRMZM2G152141	pme invertase inhibitor-like protein	-1.87547
GRMZM5G810595	NA	-1.88004
AC196790.3_FG002	NA	-1.88438
GRMZM2G453812	NA	-1.88823
AC185310.4_FG002	NA	-1.88983
GRMZM2G059810	NA	-1.8948
GRMZM2G038554	NA	-1.90032
GRMZM5G890938	NA	-1.92221
GRMZM2G107771	f-box kelch-repeat protein at2g44130-like	-1.92788
GRMZM2G140535	NA	-1.92864
GRMZM2G103055	alpha-amylase	-1.93026
GRMZM2G170027	dnaj homolog subfamily c member 21-like	-1.93676
GRMZM2G145670	NA	-1.93896
GRMZM2G108123	NA	-1.94172
GRMZM2G166007	NA	-1.94244
GRMZM2G516004	NA	-1.94483
GRMZM2G420571	NA	-1.94893
GRMZM2G020272	NA	-1.96205
GRMZM2G419290	g-type lectin s-receptor-like serine threonine-protein kinase b120-like	-1.96362
AC185601.3_FG007	NA	-1.96369
GRMZM2G557357	uncharacterized protein LOC100384148	-1.96713
GRMZM2G473743	NA	-1.97338
GRMZM2G000692	hypothetical protein SORBIDRAFT_02g029700	-1.97559
AC194206.3_FG003	NA	-1.97561
GRMZM5G877198	NA	-1.9766
GRMZM2G086880	heat shock transcription factor 8	-1.98673
GRMZM5G859315	unknown	-1.98828
GRMZM2G173929	NA	-1.98996
GRMZM5G822317	retrotransposon expressed	-1.99046
GRMZM2G009953	NA	-1.99063
GRMZM2G163374	uncharacterized protein LOC100277976	-1.99153
GRMZM2G155025	NA	-1.99334
GRMZM2G499730	NA	-1.99393
GRMZM2G079430	NA	-1.99624
AC212877.3_FG004	NA	-1.99647
GRMZM2G035524	NA	-1.99972
GRMZM2G402797	ring-h2 finger protein atl2a	-2.00004
GRMZM2G359230	#NAME?	-2.00082
GRMZM2G156761	NA	-2.00111
GRMZM2G005730	NA	-2.00434
GRMZM2G163083	mfp1 attachment factor 1	-2.00533
GRMZM5G857000	NA	-2.00592
GRMZM5G810402	NA	-2.01032
GRMZM2G173165	NA	-2.0136
GRMZM2G095069	NA	-2.01496
GRMZM2G453010	NA	-2.01561
AC208576.3_FG001	NA	-2.01667
GRMZM5G812485	NA	-2.01709
GRMZM2G004458	NA	-2.01736
AC208031.3_FG002	NA	-2.01846
AC184116.3_FG001	NA	-2.01848
GRMZM2G526502	NA	-2.0185
AC201957.4_FG002	NA	-2.01853
GRMZM2G406264	NA	-2.01856
GRMZM2G056629	aldose 1-epimerase-like	-2.01872
AC185304.4_FG010	NA	-2.02084
GRMZM2G517980	NA	-2.02216
GRMZM2G075545	NA	-2.02312
GRMZM2G081928	peroxidase	-2.02363
GRMZM2G366795	wrky transcription factor	-2.02374
GRMZM5G893607	NA	-2.02389
GRMZM2G035105	NA	-2.02465
GRMZM2G103272	NA	-2.02528
AC233904.1_FG002	NA	-2.02558
GRMZM2G340143	NA	-2.02612
GRMZM2G020622	NA	-2.03059
GRMZM2G434131	wpp domain-interacting protein 1-like	-2.03092
GRMZM2G049740	NA	-2.03125
GRMZM2G472719	NA	-2.03822
GRMZM2G543459	NA	-2.03862
GRMZM2G087016	NA	-2.03986
GRMZM2G484432	NA	-2.04089
GRMZM2G080293	NA	-2.04248
GRMZM2G565107	NA	-2.04386
GRMZM2G365970	NA	-2.04523
GRMZM2G127543	uncharacterized protein LOC100304182	-2.04536
GRMZM2G434353	rna polymerase ii largest subunit	-2.04547
GRMZM2G097052	NA	-2.0473
GRMZM2G173129	NA	-2.04818
GRMZM2G093003	NA	-2.0501
GRMZM2G320733	NA	-2.05241
GRMZM2G529822	NA	-2.05346
GRMZM2G099794	NA	-2.05514
AC205142.3_FG004	NA	-2.05768
GRMZM2G501099	NA	-2.05771
GRMZM5G811674	unknown	-2.05774
AC203042.3_FG008	NA	-2.05797
GRMZM2G062370	NA	-2.05867
GRMZM2G458201	NA	-2.05888
GRMZM2G070424	NA	-2.05899
GRMZM2G150925	upf0496 protein at3g49070-like	-2.05926
GRMZM2G005114	ulp1 protease c-terminal catalytic domain containing protein	-2.05951
GRMZM2G071283	NA	-2.05967
GRMZM5G858617	NA	-2.05975
GRMZM2G435942	NA	-2.06053
GRMZM2G702115	NA	-2.06094
GRMZM2G052825	NA	-2.06331
AC203837.3_FG003	NA	-2.06373
GRMZM2G057240	NA	-2.06391
GRMZM2G030111	NA	-2.06515
GRMZM2G468892	NA	-2.06558
GRMZM2G139199	cyclin-dependent kinase f-2-like	-2.06642
AC191518.2_FG003	NA	-2.07284
GRMZM2G527879	NA	-2.07542
AC191686.3_FG002	NA	-2.07581
GRMZM5G859330	NA	-2.082
GRMZM2G010764	NA	-2.08603
AC195139.3_FG001	NA	-2.08696
GRMZM5G880541	NA	-2.08825
GRMZM2G106401	NA	-2.0899
GRMZM2G135882	NA	-2.09054
GRMZM2G026060	NA	-2.09193
GRMZM2G498017	NA	-2.09336
GRMZM2G444519	NA	-2.09378
GRMZM2G330848	9-cis-epoxycarotenoid dioxygenase chloroplastic-like	-2.09385
GRMZM2G333579	protein mei2-like 2-like	-2.09418
GRMZM2G527076	NA	-2.09495
GRMZM2G022841	callose synthase	-2.09606
GRMZM5G824681	NA	-2.09665
AC212354.3_FG002	NA	-2.09689
GRMZM2G158684	NA	-2.09708
AC186651.3_FG003	NA	-2.09824
GRMZM2G071620	panicle phytomer 2-like partial	-2.10069
AC215169.3_FG001	NA	-2.10182
GRMZM2G575139	NA	-2.12779
GRMZM2G067257	serine palmitoyltransferase	-2.13187
GRMZM2G373893	NA	-2.13641
GRMZM2G426678	NA	-2.13706
GRMZM2G355229	u3 small nucleolar rna-associated protein 11	-2.13721
GRMZM2G029410	NA	-2.14861
GRMZM2G059088	prostrate growth 1	-2.15053
GRMZM5G834658	unknown	-2.16119
AC214133.3_FG012	NA	-2.16208
GRMZM2G521401	NA	-2.17533
GRMZM5G825876	NA	-2.17614
GRMZM2G424659	inhibitor of apoptosis-like protein	-2.19738
AC201740.3_FG008	NA	-2.19998
GRMZM2G413796	leucine rich repeat family expressed	-2.20092
GRMZM2G108265	nodulation protein h-like	-2.22359
AC187032.5_FG003	NA	-2.22434
GRMZM5G843192	abc transporter b family member	-2.23054
GRMZM2G121638	NA	-2.23133
GRMZM2G361242	tel2-interacting protein	-2.23154
GRMZM5G855304	unknown	-2.23473
GRMZM2G110425	NA	-2.23594
GRMZM2G085476	nnja7_maize ame: full=ninja-family protein 7	-2.24035
GRMZM2G054022	NA	-2.24227
GRMZM2G055585	mannan endo- -beta-mannosidase 7	-2.24367
GRMZM5G845613	NA	-2.24767
GRMZM2G141839	NA	-2.25454
GRMZM2G074094	histone-lysine n-methyltransferase	-2.26665
GRMZM2G033148	NA	-2.29181
GRMZM2G104696	NA	-2.29946
GRMZM2G135758	NA	-2.30288
GRMZM5G887654	NA	-2.3048
GRMZM2G121834	NA	-2.307
GRMZM2G090353	NA	-2.3214
AC187082.3_FG002	NA	-2.32251
GRMZM5G832412	NA	-2.32724
GRMZM2G484072	NA	-2.32827
GRMZM2G565702	NA	-2.33015
AC199571.3_FG003	NA	-2.33024
GRMZM2G575546	NA	-2.33325
GRMZM2G065423	rop guanine nucleotide exchange factor 1-like	-2.33522
GRMZM2G479918	NA	-2.33611
GRMZM2G417222	hypothetical protein SORBIDRAFT_05g025720	-2.33742
GRMZM2G096448	NA	-2.33759
GRMZM5G838907	unknown	-2.33765
GRMZM5G893355	NA	-2.34025
GRMZM2G368504	NA	-2.34162
GRMZM2G096717	NA	-2.34248
GRMZM2G041303	NA	-2.34836
GRMZM2G369481	uncharacterized protein LOC100278307	-2.35448
AC205260.3_FG002	NA	-2.35586
GRMZM2G048544	NA	-2.35644
GRMZM5G839229	NA	-2.36293
GRMZM2G369260	delta dna polymerase	-2.36452
GRMZM2G104534	protein scar2	-2.36485
GRMZM2G328593	hypothetical protein SORBIDRAFT_02g039770	-2.36492
AC193658.3_FG001	NA	-2.3693
GRMZM2G172192	dna binding	-2.36992
GRMZM2G350701	NA	-2.37067
GRMZM2G381056	NA	-2.374
GRMZM2G051545	expansin-like 3 precursor	-2.37493
GRMZM2G082255	NA	-2.37537
GRMZM2G002043	digalactosyldiacylglycerol synthase	-2.37543
AC204923.4_FG003	NA	-2.37598
GRMZM2G327680	ap-3 complex subunit mu-1-like	-2.37605
GRMZM2G168779	NA	-2.37625
GRMZM2G162093	NA	-2.37629
GRMZM2G108910	NA	-2.37839
GRMZM5G865212	NA	-2.38051
GRMZM2G168133	NA	-2.38353
GRMZM2G042429	auxin induced protein	-2.38473
AC202432.3_FG007	NA	-2.3881
AC206274.3_FG006	NA	-2.39252
GRMZM2G370793	NA	-2.3979
GRMZM2G430367	NA	-2.40601
GRMZM2G095699	NA	-2.40941
GRMZM2G017593	pentatricopeptide repeat-containing protein chloroplastic-like	-2.41746
GRMZM2G415733	NA	-2.42106
GRMZM2G052247	NA	-2.43141
GRMZM2G017550	glycerophosphoryl diester phosphodiesterase	-2.43857
GRMZM2G344539	NA	-2.50917
GRMZM2G500004	NA	-2.51531
GRMZM2G020708	NA	-2.56307
AC200703.4_FG005	NA	-2.56323
GRMZM2G470648	NA	-2.57235
GRMZM2G149066	NA	-2.58535
GRMZM2G370896	myb transcription factor	-2.58934
GRMZM2G363175	NA	-2.60994
GRMZM2G029575	NA	-2.61226
GRMZM2G046466	NA	-2.61327
GRMZM2G466309	uncharacterized protein LOC100277464	-2.62174
GRMZM2G163602	NA	-2.62658
GRMZM2G177150	glycerol-3-phosphate acyltransferase 1-like	-2.62685
GRMZM2G173107	NA	-2.62723
GRMZM5G891867	NA	-2.62794
AC204894.3_FG009	NA	-2.64
GRMZM2G535030	NA	-2.64089
GRMZM5G814023	NA	-2.64149
GRMZM2G010176	ring finger protein	-2.64199
GRMZM2G338364	NA	-2.64226
AC213631.2_FG005	NA	-2.64741
GRMZM2G345776	hypothetical protein SORBIDRAFT_01g017080	-2.65452
GRMZM2G121928	NA	-2.66
GRMZM2G092696	NA	-2.67618
AC187080.3_FG007	NA	-2.67862
GRMZM2G702729	NA	-2.68057
GRMZM2G128693	disease resistance rpp13-like protein 1-like	-2.69619
GRMZM2G373936	alpha-( )-fucosyltransferase-like	-2.71932
AC187266.3_FG001	NA	-2.72376
GRMZM2G166062	ribonuclease p protein subunit p25	-2.73139
GRMZM2G577373	NA	-2.73227
GRMZM2G516952	NA	-2.74319
GRMZM5G812472	NA	-2.75348
GRMZM2G482836	NA	-2.82443
GRMZM2G354373	subtilisin-like protease-like	-2.83677
GRMZM5G894029	na+ h+ antiporter	-2.84578
GRMZM2G080955	NA	-2.84849
GRMZM2G347995	NA	-2.84946
GRMZM2G070139	NA	-2.85657
GRMZM5G816386	NA	-2.86769
GRMZM2G704042	hypothetical protein SORBIDRAFT_01g010890	-2.87706
GRMZM2G065459	NA	-2.89467
GRMZM2G464091	NA	-2.90779
GRMZM2G100360	NA	-2.91274
GRMZM5G843484	NA	-2.94778
GRMZM2G348301	hypothetical protein SORBIDRAFT_02g007280	-2.98578
GRMZM2G380817	NA	-3.02562
AC203803.4_FG004	NA	-3.02744
GRMZM2G311864	ankyrin-like protein	-3.03205
GRMZM2G466769	dna helicase	-3.08247
GRMZM5G860469	kinesin heavy chain	-3.09794
GRMZM2G027510	NA	-3.10218
AC191379.3_FG002	NA	-3.11263
GRMZM5G856417	NA	-3.12007
GRMZM2G058739	NA	-3.24594
GRMZM2G414727	saur56 - auxin-responsive saur family member	-3.31381
GRMZM2G474755	polcalcin jun o 2	-3.3741
GRMZM2G025833	beta-amylase	-3.41225
GRMZM2G038001	glycerophosphoryl diester phosphodiesterase family protein	-3.41501
AC195138.3_FG002	NA	-3.49676
AC207454.3_FG004	NA	-3.50486
GRMZM2G342920	NA	-3.85544
GRMZM5G882080	uncharacterized protein LOC100384561	-4.15005
GRMZM2G166396	NA	-4.52728
GRMZM5G823010	NA	-16.0643
GRMZM2G103983	tonoplast intrinsic protein	-23.9118
GRMZM2G035992	vacuolar protein 8-like	-25.5236
GRMZM5G877321	NA	-26.6221
AC185478.4_FG004	NA	-175.477
AC190835.3_FG001	NA	-233.025
GRMZM2G001462	NA	-295.779

## Sheet: b
Gene ID	Discription	log2 (FC) 6 WW Loc	log2 (FC) 6 WO Sys
GRMZM2G062218	zinc finger protein constans-like protein	-1.25598	-1.36795

## Sheet: c
Gene ID	Discription	6 WW Loc	log2 (FC) 6 WO Sys	log2 (FC) 6 WO Loc
GRMZM2G419994	wound induced protein	-1.0265	-1.12534	-1.29748
GRMZM2G074097	thiamine biosynthetic enzyme	-1.02678	-1.11289	-1.40104
GRMZM2G026576	f-box domain containing protein	-1.12614	-1.04322	-1.01526
GRMZM2G006287	pumilio-family rna binding repeat containing expressed	-1.25854	-1.12558	-1.60233
GRMZM2G099305	probable n-acetyltransferase hookless 1	-1.77306	-1.0051	-2.88333
GRMZM2G021106	phosphoethanolamine phosphocholine	-1.85986	-1.43572	-1.87322
GRMZM2G060712	hypothetical protein SORBIDRAFT_06g019520	-2.15135	-1.05527	-2.52437
GRMZM2G046297	serine threonine-protein kinase at5g01020-like	-2.55347	-1.80162	-3.09013
GRMZM2G165387	protein kinase receptor type precursor	-2.74442	-1.48221	-3.45278

## Sheet: d
Gene ID	Discription	log2 (FC) 6 WW Loc	log2 (FC) 6 WO Loc
GRMZM2G427418	calmodulin-binding protein	-1.00011	-2.55749
GRMZM5G842094	NA	-1.00142	-1.56762
GRMZM2G105657	uncharacterized protein LOC100274546	-1.00143	-1.77736
GRMZM2G122584	NA	-1.00288	-1.63839
GRMZM2G113290	NA	-1.00297	-2.00039
GRMZM2G152512	NA	-1.0036	-1.24396
GRMZM2G306105	uncharacterized protein LOC100274526	-1.00397	-1.74003
GRMZM2G062854	atp synthase cf1 beta subunit	-1.00413	-1.87135
GRMZM2G703765	NA	-1.00433	-2.00504
GRMZM5G805270	NA	-1.00464	-1.57662
GRMZM2G167008	uncharacterized protein LOC100501395	-1.00478	-1.11521
GRMZM2G144021	abhydrolase domain-containing protein fam108c1-like	-1.00482	-1.016
GRMZM2G165987	pirin-like protein	-1.00494	-1.00639
GRMZM5G835615	NA	-1.00496	-2.3944
AC194286.3_FG002	NA	-1.00505	-1.5256
GRMZM2G387199	NA	-1.00507	-1.31315
GRMZM2G323475	zinc knuckle domain containing	-1.00566	-1.10959
GRMZM2G173668	phosphoglucosamine mutase family protein	-1.00571	-1.64122
GRMZM2G113340	NA	-1.00622	-1.35237
GRMZM5G866583	NA	-1.00674	-1.45033
GRMZM2G524813	NA	-1.00677	-1.43972
GRMZM2G348037	NA	-1.00705	-2.46374
GRMZM2G337128	manganese-dependent adp-ribose cdp-alcohol diphosphatase-like	-1.00711	-1.39561
GRMZM5G821392	NA	-1.00744	-1.63614
GRMZM2G131080	NA	-1.00808	-2.56479
GRMZM5G868972	NA	-1.00847	-1.50781
GRMZM2G098260	NA	-1.00886	-1.01715
GRMZM2G590346	NA	-1.00896	-1.14643
GRMZM2G180903	40s ribosomal protein s4	-1.00922	-1.58237
GRMZM2G052586	plastid ribosomal protein l35	-1.00934	-1.19282
GRMZM2G050481	serine--glyoxylate aminotransferase	-1.00987	-1.94416
GRMZM5G859334	NA	-1.00997	-1.49287
GRMZM2G426888	pentatricopeptide repeat-containing protein at1g08070-like	-1.01029	-1.64142
GRMZM2G084110	NA	-1.01048	-1.62132
GRMZM2G084727	racemase and acting on amino acids and	-1.01105	-1.63838
GRMZM2G700649	NA	-1.01127	-1.33736
GRMZM2G556078	pan domain-containing protein	-1.01194	-2.6084
GRMZM2G005170	vesicle-associated protein 2-2	-1.01217	-1.05368
GRMZM2G433849	NA	-1.01263	-1.9475
GRMZM2G092780	inorganic phosphate transporter 2-1	-1.01282	-1.03284
AC187879.3_FG001	NA	-1.01308	-1.31284
GRMZM2G006411	NA	-1.0135	-1.99132
GRMZM5G847573	NA	-1.01357	-1.02025
GRMZM2G419542	NA	-1.01382	-1.06363
GRMZM5G836205	NA	-1.0139	-1.43359
AC183590.4_FG003	NA	-1.01422	-1.65594
GRMZM2G149428	chlorophyll a b-binding apoprotein cp26 precursor	-1.01427	-1.62623
GRMZM5G888793	ribosomal protein s19	-1.0143	-1.00174
AC190909.3_FG004	NA	-1.01439	-1.44366
GRMZM2G121796	NA	-1.01467	-1.75148
GRMZM2G069994	NA	-1.01543	-1.71935
GRMZM5G858491	NA	-1.01549	-1.97078
AC204325.3_FG002	NA	-1.01593	-1.07946
GRMZM2G430482	chloroplast orf137	-1.01651	-1.59541
AC198981.4_FG002	NA	-1.01651	-1.99298
GRMZM2G062938	NA	-1.01695	-3.16197
GRMZM2G108416	branched-chain-amino-acid aminotransferase-like protein 2	-1.01717	-1.32322
GRMZM2G317450	bhlh protein family-like	-1.01761	-1.23344
GRMZM2G109674	hypothetical protein SORBIDRAFT_08g000390	-1.01768	-1.1669
AC209075.3_FG007	NA	-1.01778	-1.03917
GRMZM2G004191	uncharacterized protein LOC100274884	-1.01799	-1.41777
GRMZM2G440754	NA	-1.01855	-1.00058
GRMZM2G043069	protein kinase	-1.01855	-1.57745
GRMZM2G066044	hypothetical protein SORBIDRAFT_06g000630	-1.01857	-1.14155
GRMZM5G860077	NA	-1.01865	-1.16922
GRMZM2G031536	probable lrr receptor-like serine threonine-protein kinase at1g56130-like	-1.01878	-1.28351
GRMZM2G164268	NA	-1.01969	-1.00783
GRMZM2G014290	NA	-1.02013	-1.30604
GRMZM2G036880	chlorophyll a-b binding protein 6a	-1.02016	-1.6438
GRMZM2G035401	NA	-1.02025	-1.21632
GRMZM2G002515	serine threonine-protein kinase bri1-like 2	-1.02027	-1.73706
GRMZM2G051738	dna binding	-1.02112	-1.10428
GRMZM2G333786	NA	-1.02116	-1.00131
GRMZM2G139846	ubiquitin-associated protein	-1.0212	-2.01478
GRMZM5G825193	receptor serine threonine kinase pr5k	-1.0213	-1.2863
GRMZM2G150796	isoamylase chloroplastic-like	-1.02154	-1.00887
AC190801.3_FG005	NA	-1.02206	-1.15039
GRMZM5G813181	NA	-1.02246	-1.62314
GRMZM2G353734	zf-hd homeobox protein	-1.02246	-1.25959
GRMZM2G520211	NA	-1.02277	-1.54446
GRMZM5G888487	NA	-1.02312	-1.14164
GRMZM2G351210	NA	-1.02366	-1.0005
AC185479.3_FG006	NA	-1.02366	-1.69578
GRMZM2G450863	atp sulfurylase	-1.02418	-1.80202
AC193575.2_FG003	NA	-1.02421	-1.06676
GRMZM5G820360	NA	-1.0243	-1.62812
GRMZM2G057955	caprice-like myb3	-1.02434	-1.70573
GRMZM2G152342	NA	-1.02466	-2.39141
GRMZM2G042893	dna binding like	-1.02467	-1.28705
GRMZM2G041041	NA	-1.02499	-1.99024
AC200617.3_FG003	NA	-1.02514	-3.33174
GRMZM2G456473	histone deacetylase	-1.02545	-2.07821
GRMZM2G145095	enzyme of the cupin superfamily	-1.02583	-3.00426
GRMZM2G070923	NA	-1.02588	-1.68419
GRMZM2G420619	uncharacterized protein LOC100277853	-1.02642	-1.00241
GRMZM2G096367	gene x-like protein	-1.02645	-1.44757
GRMZM2G317338	NA	-1.02673	-1.02192
GRMZM2G479546	nodulin-like protein	-1.02687	-1.72835
GRMZM2G153271	NA	-1.0272	-1.02477
GRMZM2G151044	trehalose-phosphate phosphatase-like	-1.02731	-1.58579
GRMZM2G344508	NA	-1.02742	-1.18136
GRMZM2G309216	NA	-1.02811	-1.20917
AC190909.3_FG003	NA	-1.02825	-1.44133
GRMZM2G180951	callose synthase 3-like	-1.02855	-1.46923
GRMZM2G108639	NA	-1.02874	-1.27778
GRMZM2G064022	NA	-1.02887	-1.9867
GRMZM2G534984	NA	-1.0289	-1.00727
AC208848.3_FG005	NA	-1.02983	-1.04296
AC233851.1_FG015	NA	-1.03008	-1.59661
GRMZM5G863837	NA	-1.03055	-2.02348
GRMZM2G451028	mucin-like protein	-1.03062	-1.00964
GRMZM2G106650	NA	-1.0307	-2.49121
GRMZM2G128322	heat shock -like	-1.03161	-1.01483
GRMZM2G492296	hypothetical protein	-1.03168	-1.51917
GRMZM5G872680	NA	-1.03171	-2.01689
GRMZM2G149930	uncharacterized protein LOC100278018 precursor	-1.03213	-1.75069
GRMZM2G040881	NA	-1.03219	-3.02457
GRMZM2G328908	NA	-1.03245	-1.70476
GRMZM5G814335	NA	-1.03262	-1.3788
GRMZM2G037084	NA	-1.03271	-2.61048
GRMZM2G348014	vacuolar protein sorting 13c	-1.03273	-1.23043
GRMZM2G573686	NA	-1.03337	-1.5632
GRMZM2G139123	NA	-1.0336	-1.02343
GRMZM2G078841	NA	-1.03388	-1.03915
AC203294.3_FG012	NA	-1.03451	-2.04825
GRMZM2G006714	calmodulin-binding protein	-1.03507	-1.28306
GRMZM2G551565	NA	-1.03586	-1.16545
GRMZM2G436864	NA	-1.03613	-1.04746
GRMZM2G429035	hypothetical protein	-1.03626	-1.56247
GRMZM2G110192	carotenoid cleavage dioxygenase 4	-1.03628	-1.41164
GRMZM2G154809	NA	-1.03702	-1.84863
GRMZM2G053554	alpha-galactosidase	-1.03726	-1.05386
GRMZM5G877428	NA	-1.03727	-1.04304
GRMZM2G458867	pdr-like abc transporter	-1.03778	-2.32984
GRMZM2G354354	NA	-1.03795	-1.25428
GRMZM2G547742	NA	-1.03807	-1.47414
GRMZM2G063402	NA	-1.03812	-1.5981
GRMZM2G161306	NA	-1.03813	-1.64429
GRMZM2G018262	lysine histidine transporter	-1.03837	-1.01361
GRMZM2G073293	NA	-1.03864	-2.01413
GRMZM2G085974	math domain containing protein	-1.03897	-1.38139
GRMZM2G700727	NA	-1.03912	-1.19098
GRMZM2G113765	NA	-1.03919	-1.13805
GRMZM2G109564	usp family protein	-1.0395	-2.03963
GRMZM2G352274	uncharacterized protein LOC100502207	-1.03975	-1.03441
GRMZM2G081057	NA	-1.03998	-1.76393
GRMZM2G032685	NA	-1.04025	-1.32896
GRMZM5G853967	NA	-1.04066	-1.04799
GRMZM2G029455	ralfl33 precursor	-1.04171	-1.42592
GRMZM2G313104	hypothetical protein SORBIDRAFT_01g032640	-1.04188	-1.24574
GRMZM2G701355	NA	-1.04211	-1.01057
GRMZM2G087575	uncharacterized protein LOC100274070	-1.04258	-2.04735
AC210777.4_FG004	NA	-1.04272	-1.76107
GRMZM2G010439	hypothetical protein	-1.0436	-1.71054
GRMZM2G533800	NA	-1.04391	-1.45197
GRMZM2G496119	NA	-1.04398	-1.756
GRMZM2G075563	tpr domain containing expressed	-1.04424	-2.03664
GRMZM2G107199	cytochrome p450	-1.04465	-1.2973
GRMZM2G169763	NA	-1.04486	-1.48085
GRMZM5G881399	NA	-1.04523	-1.61412
GRMZM2G549012	NA	-1.0453	-1.00212
GRMZM2G472146	NA	-1.0453	-2.18815
GRMZM2G141447	NA	-1.04553	-1.45632
GRMZM2G149952	atp sulfurylase	-1.04593	-1.7617
GRMZM2G021508	NA	-1.04615	-3.3588
GRMZM2G064008	---NA---	-1.04621	-1.29034
GRMZM2G366485	NA	-1.04624	-2.07463
GRMZM2G070310	NA	-1.04627	-1.85933
GRMZM2G035143	NA	-1.0464	-2.62301
GRMZM2G409131	pyrophosphate-dependent phosphofructokinase alpha subunit	-1.04664	-1.07627
GRMZM2G442889	NA	-1.04688	-1.0476
AC205474.3_FG005	NA	-1.04744	-1.62371
GRMZM2G331741	NA	-1.04759	-1.94546
GRMZM2G010004	NA	-1.04782	-1.08025
GRMZM2G481471	dna polymerase delta subunit	-1.04787	-1.04863
GRMZM2G101253	NA	-1.04788	-1.02934
GRMZM2G426161	NA	-1.04799	-1.06615
GRMZM2G507161	NA	-1.04812	-1.62931
GRMZM2G070087	phosphate transporter	-1.04825	-1.0179
GRMZM2G145819	NA	-1.04829	-1.0019
GRMZM2G444178	NA	-1.04851	-1.42651
GRMZM2G316089	NA	-1.04896	-1.27964
GRMZM2G370846	NA	-1.04898	-2.63851
GRMZM2G162282	ribulose bisphosphate carboxylase oxygenase activase chloroplast	-1.049	-1.53152
AC197676.3_FG002	NA	-1.04913	-2.61896
AC212351.4_FG001	NA	-1.05053	-1.41624
GRMZM2G382866	NA	-1.05087	-1.02948
GRMZM2G117230	alanine aminotransferase	-1.05092	-1.32512
GRMZM2G179521	glucose-6-phosphate dehydrogenase	-1.05123	-1.46212
GRMZM2G144570	NA	-1.05134	-3.44905
AC183509.1_FG001	NA	-1.05143	-1.85606
GRMZM5G806818	uncharacterized protein LOC100384824	-1.05186	-1.02708
GRMZM2G423538	pentatricopeptide repeat-containing protein	-1.05187	-1.69997
GRMZM2G156472	pentatricopeptide repeat-containing protein	-1.0519	-1.80294
GRMZM2G332891	NA	-1.05216	-1.63919
GRMZM2G510450	NA	-1.05235	-1.08032
AC199363.4_FG002	NA	-1.05238	-2.01771
GRMZM5G848520	uncharacterized protein LOC100383850	-1.05324	-1.63042
GRMZM2G099626	cell envelope integrity inner membrane protein	-1.0534	-1.15682
GRMZM2G145850	NA	-1.05362	-1.88813
GRMZM2G496747	NA	-1.05397	-1.53823
GRMZM2G701767	NA	-1.05456	-2.45185
GRMZM2G309539	NA	-1.05469	-1.42375
AC177892.2_FG003	NA	-1.05485	-1.05491
GRMZM2G158001	NA	-1.05488	-2.01828
GRMZM2G077544	NA	-1.05508	-2.02502
GRMZM2G003264	NA	-1.05521	-2.63059
GRMZM2G170769	NA	-1.05534	-1.01414
AC234160.1_FG007	NA	-1.0555	-1.03061
GRMZM2G450939	retrotransposon protein	-1.0555	-1.05104
GRMZM2G108527	NA	-1.05575	-1.57729
GRMZM2G369469	glycine-rich protein	-1.05587	-1.06351
GRMZM2G343570	l-type lectin-domain containing receptor kinase -like	-1.05598	-2.63931
GRMZM2G177412	glutamyl-trna reductase	-1.05599	-1.84732
GRMZM2G431691	NA	-1.05639	-1.02953
GRMZM2G399333	hypothetical protein SORBIDRAFT_09g028200	-1.05642	-1.04709
GRMZM2G003246	gibberellin receptor gid1l2	-1.05643	-2.12677
GRMZM2G318635	protein kiaa0664 homolog	-1.05667	-2.00495
AC194970.5_FG001	NA	-1.05687	-1.61372
GRMZM5G808030	NA	-1.05717	-1.0168
GRMZM2G122340	cytokinin oxidase	-1.05739	-1.76131
GRMZM2G397889	receptor-type protein kinase lrk1	-1.05741	-1.02699
GRMZM2G149600	NA	-1.05764	-2.0239
GRMZM2G148790	remorin family protein	-1.0579	-1.55056
GRMZM2G017869	gdsl esterase lipase at5g33370-like	-1.0581	-2.62175
GRMZM2G318375	NA	-1.05811	-1.25493
GRMZM2G564073	NA	-1.05831	-1.06289
GRMZM2G383612	NA	-1.05855	-1.06835
GRMZM2G463415	NA	-1.05874	-1.28747
GRMZM2G314818	NA	-1.05896	-1.02286
GRMZM2G054905	insulin degrading enzyme	-1.05902	-1.14533
GRMZM2G404530	---NA---	-1.05915	-3.01285
GRMZM5G847462	uncharacterized protein LOC100216699	-1.05923	-1.62784
GRMZM2G036817	NA	-1.05941	-1.70993
GRMZM2G386025	NA	-1.0596	-1.51578
GRMZM2G092575	NA	-1.05968	-2.61681
GRMZM5G858850	NA	-1.0597	-1.64218
GRMZM2G406170	burp domain-containing protein	-1.06094	-1.06296
GRMZM5G869150	NA	-1.06108	-1.35386
GRMZM2G312748	NA	-1.06126	-2.04161
GRMZM2G700603	NA	-1.06176	-1.02267
GRMZM2G045660	pleckstrin homology domain-containing	-1.06199	-1.02794
GRMZM2G105245	NA	-1.06238	-1.03079
GRMZM2G169363	solute carrier family 25 member 44-like	-1.06247	-1.10601
GRMZM2G021256	photosystem ii oxygen-evolving enhancer protein	-1.06264	-1.59966
GRMZM2G058244	udp-glucose 6- expressed	-1.06296	-1.75883
GRMZM2G111648	NA	-1.06322	-1.48497
GRMZM2G088964	probable potassium transporter 17-like	-1.06338	-1.58152
GRMZM5G846875	NA	-1.06344	-1.27873
GRMZM2G040230	probable s-acyltransferase at1g69420-like	-1.06353	-2.04182
GRMZM2G024169	NA	-1.06378	-2.06494
GRMZM2G303149	chaperone protein dnaj chloroplastic-like	-1.06382	-1.04306
AC217528.3_FG001	NA	-1.06382	-1.05435
GRMZM2G323479	villin- expressed	-1.06386	-1.04821
GRMZM5G887361	NA	-1.06395	-1.43861
GRMZM2G080561	NA	-1.06408	-1.0805
GRMZM2G007249	1-aminocyclopropane-1-carboxylate oxidase	-1.0644	-1.04526
GRMZM2G158824	NA	-1.06457	-1.29507
GRMZM2G378580	auxin response factor expressed	-1.06459	-1.3336
GRMZM2G413956	NA	-1.06465	-2.02351
GRMZM2G517302	NA	-1.06483	-1.05502
GRMZM2G542213	NA	-1.06505	-2.02241
GRMZM2G351865	NA	-1.06525	-1.06353
GRMZM2G160356	NA	-1.06531	-1.03271
GRMZM2G107562	NA	-1.06562	-1.76152
GRMZM2G021228	NA	-1.06574	-1.31069
GRMZM2G180262	VQ	-1.06609	-1.45442
GRMZM2G164385	NA	-1.06615	-1.06369
GRMZM2G116498	NA	-1.06627	-2.065
GRMZM5G864536	NA	-1.06637	-2.35506
GRMZM2G424446	NA	-1.06659	-1.06377
GRMZM5G811409	NA	-1.0671	-1.49564
GRMZM2G039173	nodulin-like protein	-1.06749	-1.96431
GRMZM2G162529	phosphoribulokinase precursor	-1.06824	-1.74706
GRMZM2G475753	NA	-1.06848	-1.74384
GRMZM2G164430	NA	-1.06858	-1.46612
GRMZM2G078324	NA	-1.06889	-2.01239
GRMZM2G005526	nucleobase-ascorbate transporter 1-like	-1.06949	-1.06001
GRMZM2G503000	NA	-1.06963	-1.60594
AC188716.3_FG005	NA	-1.06976	-2.037
GRMZM2G089052	NA	-1.06977	-1.80065
GRMZM2G018627	chlorophyll a-b binding protein	-1.0701	-3.86145
GRMZM2G390607	NA	-1.0701	-2.38385
GRMZM2G391902	NA	-1.07019	-2.04888
GRMZM2G010027	NA	-1.07063	-1.30346
GRMZM2G124184	NA	-1.07068	-1.08061
GRMZM2G309709	NA	-1.07111	-1.64103
GRMZM2G452910	lipase class 3 family protein	-1.07124	-1.30778
AC191521.3_FG004	NA	-1.07197	-1.06745
GRMZM2G042995	uncharacterized protein LOC100383491	-1.07203	-1.88934
AC210188.3_FG008	NA	-1.07233	-1.06483
GRMZM2G451474	NA	-1.07259	-2.62745
GRMZM2G081816	bhlh transcription-like	-1.07313	-1.6709
GRMZM2G119381	NA	-1.07317	-1.02957
GRMZM2G329962	NA	-1.07339	-1.03938
GRMZM2G156126	lipase class 3 family protein	-1.0738	-1.20719
GRMZM2G126481	uncharacterized protein LOC100381509	-1.07416	-2.04945
GRMZM2G316054	NA	-1.07471	-1.52517
GRMZM2G095709	NA	-1.07476	-1.34925
GRMZM5G845374	NA	-1.07551	-1.17101
AC233785.2_FG005	NA	-1.07594	-1.19342
GRMZM2G500285	NA	-1.07632	-1.04741
GRMZM2G004377	protein phosphatase 2c containing expressed	-1.07669	-1.32935
GRMZM2G563704	NA	-1.0776	-1.0458
GRMZM5G813886	abc transporter g family member 22-like	-1.07796	-1.52457
GRMZM2G002883	NA	-1.07866	-1.29202
GRMZM2G526199	NA	-1.07936	-1.31204
GRMZM2G017290	photosystem i reaction center subunit iii	-1.08054	-1.70693
GRMZM2G058595	root phototropism protein 2	-1.08058	-2.08956
GRMZM5G839416	atp binding	-1.08058	-1.73755
GRMZM2G347836	phosphatidic acid phosphatase family protein	-1.08064	-1.30369
GRMZM2G052948	serine threonine protein kinase	-1.08139	-1.31264
GRMZM2G056547	unknown	-1.08192	-1.6237
GRMZM2G339435	uncharacterized protein LOC100277227	-1.08267	-1.22508
GRMZM5G830269	uncharacterized protein LOC100216657	-1.08268	-2.06081
GRMZM2G144146	octicosapeptide phox bem1p domain-containing protein	-1.08278	-3.05017
GRMZM5G838435	epoxide hydrolase	-1.08344	-1.26655
GRMZM2G704039	NA	-1.08372	-1.79637
GRMZM2G312712	zinc finger	-1.08416	-1.14439
GRMZM2G008202	chloroplast-targeted copper	-1.08446	-1.41071
GRMZM2G142497	NA	-1.08486	-2.0829
GRMZM2G352073	NA	-1.08552	-1.0505
GRMZM2G003869	leaf protein	-1.08581	-1.87209
GRMZM2G458048	NA	-1.08605	-1.04884
GRMZM2G048022	hypothetical protein	-1.08618	-1.57982
GRMZM2G700614	NA	-1.08663	-1.93992
GRMZM2G322658	NA	-1.08672	-1.50573
GRMZM2G344205	membrane related protein	-1.08696	-1.54842
AC198234.4_FG002	NA	-1.08701	-1.04802
GRMZM2G175827	kanadi1-like protein	-1.08765	-1.40428
AC208675.3_FG002	NA	-1.08774	-1.05713
GRMZM2G455825	NA	-1.08798	-1.04853
AC208514.3_FG001	NA	-1.08948	-2.12999
GRMZM2G041424	hypothetical protein	-1.08975	-1.47601
GRMZM2G436266	NA	-1.08986	-2.034
GRMZM2G136559	plastid ribosomal protein l35	-1.09021	-1.0611
GRMZM5G880361	disease resistance protein rpm1-like	-1.09022	-1.05217
GRMZM2G045171	sucrose synthase 2-like	-1.09025	-1.06804
GRMZM2G360641	NA	-1.09032	-1.06786
AC213654.3_FG004	NA	-1.09043	-1.48814
AC194696.3_FG001	NA	-1.0905	-1.03435
GRMZM2G104556	NA	-1.09097	-1.0475
GRMZM2G303742	NA	-1.09103	-2.06123
GRMZM2G496996	NA	-1.0919	-1.04816
GRMZM2G038598	udp-glucose 4-epimerase	-1.09221	-1.06457
GRMZM2G134171	NA	-1.09274	-1.04141
AC211327.4_FG001	NA	-1.09282	-1.06195
AC195785.3_FG005	NA	-1.09358	-1.06021
GRMZM2G144982	hypothetical protein	-1.09383	-1.31962
GRMZM2G439638	NA	-1.09405	-1.15058
GRMZM2G071599	NA	-1.09421	-1.44237
GRMZM2G450253	NA	-1.09433	-1.0557
GRMZM2G153510	NA	-1.09461	-1.07813
GRMZM2G470478	NA	-1.09473	-1.04985
GRMZM2G178337	NA	-1.09499	-1.31828
GRMZM2G055973	ring zinc finger	-1.09547	-1.18557
GRMZM2G101390	atp binding	-1.09549	-1.12505
AC209213.4_FG002	NA	-1.09558	-1.09544
AC200495.3_FG001	NA	-1.09622	-1.36467
GRMZM2G164225	NA	-1.09658	-1.36471
GRMZM2G047966	NA	-1.09659	-1.93991
GRMZM2G431963	NA	-1.09694	-1.29512
GRMZM2G331103	NA	-1.09706	-1.31189
GRMZM2G317170	NA	-1.09744	-2.0738
GRMZM2G024898	probable wrky transcription factor 14-like	-1.09755	-1.07262
GRMZM2G017080	catalytic hydrolase	-1.09804	-1.20197
GRMZM2G429955	chlorophyll a-b binding protein 2	-1.09874	-1.45385
GRMZM5G864911	NA	-1.09888	-2.04859
GRMZM2G048475	adenylyl cyclase associated protein	-1.09925	-1.72771
GRMZM2G134687	nac transcription factor	-1.0993	-1.08316
GRMZM2G556184	NA	-1.10002	-1.29531
AC188296.3_FG004	NA	-1.10046	-2.47183
GRMZM2G351747	NA	-1.10069	-1.45373
GRMZM2G101027	NA	-1.1007	-2.15844
GRMZM2G010628	uncharacterized protein LOC100275572	-1.10093	-1.4683
AC196073.2_FG001	NA	-1.10151	-1.61923
GRMZM5G878640	NA	-1.10164	-1.86683
GRMZM5G813516	NA	-1.10258	-2.6655
GRMZM2G100366	NA	-1.10279	-1.08035
GRMZM2G155392	---NA---	-1.10296	-1.09167
GRMZM2G061005	gh3 family protein	-1.10305	-1.0806
GRMZM2G020740	3-ketoacyl- synthase	-1.10317	-1.0644
GRMZM2G131746	uncharacterized protein LOC100279168 precursor	-1.10321	-1.48326
GRMZM2G448560	NA	-1.10335	-1.06003
GRMZM2G177157	NA	-1.10338	-1.06428
GRMZM2G157716	transcription termination factor domain-containing protein	-1.10355	-1.47274
GRMZM2G076260	NA	-1.10365	-1.03971
GRMZM2G166099	at5g43400 mwf20_9	-1.10405	-1.08055
GRMZM2G486741	---NA---	-1.10432	-2.08039
GRMZM2G169236	NA	-1.10434	-1.06094
GRMZM5G872150	uncharacterized protein LOC100381728	-1.10448	-1.82608
AC214168.3_FG001	NA	-1.10453	-1.08052
GRMZM5G877336	atp binding	-1.10454	-1.6736
GRMZM2G022997	phosphoglycerate mutase-like protein	-1.10457	-1.41174
GRMZM2G106588	dimethylaniline monooxygenase	-1.10487	-1.64246
GRMZM2G355844	NA	-1.10488	-1.09372
GRMZM2G066256	NA	-1.10525	-1.06306
GRMZM2G440459	haloacid dehalogenase-like hydrolase domain-containing protein 3-like	-1.10536	-1.32479
GRMZM5G897816	NA	-1.10545	-1.08047
AC186592.3_FG003	NA	-1.10575	-1.32832
GRMZM2G147164	NA	-1.10581	-1.53758
GRMZM5G811926	NA	-1.10632	-1.49235
GRMZM5G820893	NA	-1.10672	-1.06311
GRMZM2G046155	unknown	-1.10678	-2.06207
AC186028.3_FG002	NA	-1.10755	-1.02127
GRMZM5G803620	NA	-1.10767	-1.26114
GRMZM2G057440	NA	-1.10774	-1.06405
GRMZM2G180372	hypothetical protein	-1.1078	-1.4762
GRMZM2G032640	uncharacterized protein LOC100193585	-1.10787	-1.53973
GRMZM5G832229	ultraviolet-b-repressible protein	-1.10793	-1.92934
GRMZM2G304666	NA	-1.10831	-1.13711
GRMZM2G534157	NA	-1.1088	-1.06073
GRMZM2G414834	NA	-1.10898	-1.64563
GRMZM2G057748	NA	-1.10948	-1.49909
GRMZM2G445139	g10-like protein	-1.11005	-2.08527
GRMZM2G173676	NA	-1.11008	-1.26448
AC200703.4_FG004	NA	-1.11028	-2.30183
GRMZM2G014499	subtilisin-like protease-like	-1.11051	-1.64286
GRMZM5G849471	serine-threonine protein plant-	-1.11083	-1.92211
GRMZM2G086285	NA	-1.11139	-1.66488
AC231752.1_FG003	NA	-1.11146	-1.58638
GRMZM2G382481	NA	-1.11184	-1.07956
GRMZM2G324390	kinase-interacting protein 1	-1.11278	-1.85507
GRMZM5G873832	NA	-1.11367	-2.06662
AC200202.2_FG003	NA	-1.11415	-1.5306
GRMZM2G165984	NA	-1.11425	-1.38226
AC186815.3_FG003	NA	-1.11626	-1.75932
AC193402.3_FG004	NA	-1.11672	-1.58993
GRMZM2G093666	uncharacterized methyltransferase chloroplastic-like	-1.11711	-1.48486
GRMZM2G435380	polygalacturonase 2	-1.11713	-1.78215
GRMZM2G308369	powdery mildew resistance protein pm3 variant	-1.11792	-1.09103
GRMZM2G027490	unknown	-1.11827	-1.84473
GRMZM2G173387	potassium transporter	-1.11835	-1.07465
GRMZM2G084142	NA	-1.11886	-1.99171
AC217270.3_FG003	NA	-1.11908	-1.38088
GRMZM2G427351	prenylcysteine methylesterase	-1.1196	-1.43482
GRMZM2G178645	aaa-type atpase	-1.11963	-2.58165
GRMZM5G890190	usp family protein	-1.12007	-1.15371
GRMZM2G535659	NA	-1.12128	-1.04616
GRMZM5G860988	NA	-1.12223	-1.70143
GRMZM2G168185	NA	-1.12235	-1.81985
GRMZM2G125659	NA	-1.12286	-1.14476
GRMZM2G010356	terpene synthase 7	-1.12287	-3.24325
GRMZM2G418752	ribulose- bisphosphate carboxylase oxygenase large subunit n- chloroplast	-1.12321	-1.65672
AC226200.2_FG002	NA	-1.12321	-1.90939
GRMZM2G438438	zf-hd homeobox protein	-1.12408	-1.60974
GRMZM2G360668	NA	-1.12411	-1.10473
GRMZM2G178247	cyclin a-like protein	-1.12462	-1.34482
AC199842.4_FG007	NA	-1.12468	-1.8854
GRMZM2G457209	NA	-1.12471	-1.1047
GRMZM2G700206	NA	-1.12495	-1.50963
GRMZM2G136859	metal ion binding	-1.1251	-1.29945
GRMZM2G168892	NA	-1.12512	-1.82508
GRMZM2G141289	malate dehydrogenase	-1.12533	-1.62648
GRMZM2G414563	uncharacterized protein LOC100501198	-1.12558	-1.43389
GRMZM2G138431	hypothetical protein OsI_35400	-1.12606	-1.12588
GRMZM2G080546	rna binding protein	-1.12635	-2.10684
GRMZM2G551809	NA	-1.12648	-1.13464
GRMZM5G840703	ferredoxin- chloroplastic precursor	-1.12671	-1.25333
GRMZM5G872103	NA	-1.12719	-1.55548
GRMZM2G057649	NA	-1.12759	-1.21334
GRMZM2G363316	NA	-1.12853	-2.26092
GRMZM2G166044	neurofilament triplet h1 protein	-1.12897	-1.10622
GRMZM2G107246	NA	-1.12934	-1.09603
GRMZM2G009837	transcription factor bhlh113-like	-1.12955	-1.09105
GRMZM2G340651	NA	-1.13016	-1.12422
GRMZM2G339640	NA	-1.13116	-1.3491
GRMZM2G077571	NA	-1.13135	-1.51441
AC205886.3_FG001	NA	-1.13159	-1.69173
AC191272.3_FG003	NA	-1.13284	-1.75918
GRMZM2G148817	NA	-1.13367	-1.12758
GRMZM2G179703	unknown	-1.13374	-1.8795
GRMZM2G171333	uncharacterized protein LOC100275508	-1.13387	-1.64603
GRMZM5G875609	NA	-1.13387	-1.04458
GRMZM2G044676	NA	-1.13395	-1.70212
AC209445.3_FG001	NA	-1.13426	-1.28432
GRMZM2G093325	early response to dehydration 15-like protein	-1.13488	-1.35774
GRMZM2G098679	solute carrier family facilitated glucose transporter member 8	-1.13498	-1.23105
GRMZM2G077842	atp binding	-1.13528	-1.70446
GRMZM2G060156	naphthoate synthase	-1.13531	-1.92077
AC191049.3_FG007	NA	-1.13566	-1.68199
GRMZM2G443728	potassium transporter 8-like	-1.13608	-1.08254
GRMZM5G841920	uncharacterized protein LOC100193692	-1.13613	-1.56295
GRMZM2G024150	photosystem i reaction center subunit ii	-1.13626	-1.87966
GRMZM5G870219	NA	-1.13631	-1.97348
GRMZM2G049913	NA	-1.13675	-1.35854
GRMZM2G137868	aminotransferase 2	-1.13812	-1.45757
GRMZM2G441029	e3 ubiquitin-protein ligase ring1-like	-1.13833	-1.905
GRMZM2G447222	NA	-1.13863	-1.87623
GRMZM2G361164	hypothetical protein SORBIDRAFT_10g010475	-1.13956	-1.25739
GRMZM2G097983	uncharacterized protein LOC100278533	-1.14017	-1.18274
GRMZM5G850706	NA	-1.14118	-3.67703
GRMZM2G423927	uncharacterized protein LOC100279439	-1.1413	-1.95359
GRMZM2G067915	probable carboxylesterase 18-like	-1.14214	-1.20952
GRMZM2G494545	NA	-1.14278	-1.85233
GRMZM2G531955	NA	-1.14432	-1.12267
GRMZM2G148937	NA	-1.14508	-1.54696
GRMZM2G051270	atp sulfurylase	-1.14563	-1.73058
GRMZM2G103662	aspartic proteinase asp1 precursor	-1.14676	-1.79011
AC212023.4_FG004	NA	-1.14682	-1.67456
GRMZM5G897592	cytochrome c6	-1.14719	-2.04637
GRMZM2G069460	NA	-1.14742	-1.22284
GRMZM2G540834	dna-directed rna polymerases and iii kda polypeptide	-1.14747	-1.16873
GRMZM2G113065	hypothetical protein	-1.14839	-1.35021
GRMZM2G018579	NA	-1.14861	-2.43148
GRMZM5G872279	NA	-1.14915	-1.72847
GRMZM2G482662	NA	-1.14981	-2.43743
GRMZM2G051753	boron transporter	-1.15132	-1.7312
GRMZM2G095807	anthocyanidin -o-glucosyltransferase-like	-1.15144	-1.71342
GRMZM2G030070	NA	-1.15184	-1.54682
GRMZM2G555519	NA	-1.15209	-2.22713
GRMZM2G343972	protein binding protein	-1.15249	-2.72149
GRMZM2G173615	cadmium tolerant 1	-1.15288	-1.50353
GRMZM2G097804	uncharacterized protein LOC100280146	-1.15297	-1.19993
GRMZM2G489119	hypothetical protein rf1-C2-g14	-1.15299	-1.64286
GRMZM2G032193	uncharacterized protein LOC100381790	-1.15339	-1.69247
GRMZM2G167220	cytokinin dehydrogenase	-1.15383	-2.00072
GRMZM2G009103	auxin-induced protein 5ng4-like	-1.1546	-2.35382
GRMZM2G414621	hydroxyproline-rich glyco protein	-1.15472	-1.26663
GRMZM2G027056	nuclease harbi1-like	-1.15519	-2.28055
GRMZM2G148057	NA	-1.15521	-1.39654
GRMZM2G053485	hypothetical protein	-1.15584	-1.83466
GRMZM2G108663	uncharacterized protein LOC100279648	-1.15643	-2.38433
GRMZM2G093440	NA	-1.15679	-1.18144
GRMZM2G121937	hypothetical protein OsI_19108	-1.15692	-1.23072
GRMZM2G077755	transcription factor tcp14-like	-1.15727	-1.31022
GRMZM2G083841	phosphoenolpyruvate carboxylase	-1.15754	-2.06942
GRMZM2G702564	NA	-1.15897	-2.2267
GRMZM2G140924	zinc c3hc4 type family protein	-1.15975	-1.55112
GRMZM2G449232	NA	-1.16012	-1.94221
GRMZM5G889683	NA	-1.16014	-3.47807
GRMZM2G162675	NA	-1.16033	-1.83205
AC217270.3_FG004	NA	-1.16035	-3.45597
AC191526.3_FG004	NA	-1.16035	-2.158
GRMZM2G086258	plastidic general dicarboxylate transporter	-1.1605	-1.62704
GRMZM2G145330	NA	-1.1608	-1.12759
GRMZM2G587231	uncharacterized protein LOC100383178	-1.16126	-2.23356
AC234515.1_FG004	NA	-1.16129	-1.35145
GRMZM2G113994	NA	-1.16191	-1.12738
GRMZM2G078024	proline transporter 1	-1.16291	-1.34292
GRMZM2G522708	NA	-1.16317	-1.12477
GRMZM2G126168	NA	-1.16318	-1.98746
GRMZM2G018143	NA	-1.16324	-1.65399
GRMZM2G042506	unknown	-1.16357	-1.96767
GRMZM2G392909	atp-dependent dna helicase q1	-1.16487	-1.36434
GRMZM2G102790	transcription factor myb39-like	-1.16516	-1.14525
GRMZM2G483886	NA	-1.16681	-2.48498
GRMZM5G812130	NA	-1.16694	-1.12359
GRMZM2G379546	NA	-1.1678	-1.99805
GRMZM2G168002	transcription factor	-1.16805	-1.26367
GRMZM5G859078	NA	-1.16855	-1.41798
GRMZM2G458751	hypothetical protein SORBIDRAFT_04g037150	-1.16932	-1.51198
GRMZM2G313963	NA	-1.16933	-1.14442
GRMZM5G825952	NA	-1.16975	-1.15201
GRMZM2G117283	NA	-1.16994	-1.94332
GRMZM2G030252	auxin-induced protein 5ng4-like	-1.16996	-1.25144
GRMZM2G017856	hypothetical protein OsJ_17121	-1.17005	-1.36635
GRMZM2G392787	NA	-1.17011	-2.96235
AC196025.3_FG015	NA	-1.17012	-1.14461
GRMZM2G041448	hypothetical protein	-1.17016	-1.13081
GRMZM2G074546	cellulose synthase-like protein h1-like	-1.17104	-1.85255
GRMZM2G056283	NA	-1.17112	-2.14883
GRMZM2G178140	embryo-abundant protein	-1.17148	-1.14492
GRMZM2G022514	lectin-like protein kinase	-1.1715	-1.49227
GRMZM2G075562	zinc finger protein constans-like 9-like	-1.17228	-1.80167
GRMZM2G439337	NA	-1.17233	-1.7711
GRMZM2G416513	NA	-1.17242	-1.15906
GRMZM2G390334	NA	-1.17248	-1.16673
GRMZM2G074317	cyclic nucleotide-gated ion channel 2	-1.17261	-1.70598
GRMZM2G395466	NA	-1.17269	-1.74328
GRMZM2G148064	pollen allergen phl p 11	-1.17299	-1.82649
AC209819.3_FG008	NA	-1.17321	-1.12947
GRMZM5G802014	NA	-1.17418	-1.12596
GRMZM2G131516	gras family transcription factor	-1.17461	-1.28404
GRMZM2G461399	NA	-1.17605	-1.20867
GRMZM2G046140	NA	-1.17614	-1.63458
GRMZM2G113349	oxygen-evolving enhancer protein 1	-1.17678	-1.8628
GRMZM2G347628	NA	-1.17701	-1.14622
AC202067.1_FG006	NA	-1.17702	-1.15722
GRMZM2G006025	NA	-1.17733	-1.63742
AC201824.3_FG007	NA	-1.17738	-1.61762
GRMZM2G092427	chlorophyll a-b binding protein cp24	-1.17743	-1.98393
GRMZM2G427054	NA	-1.17765	-1.84185
GRMZM2G113170	NA	-1.17772	-1.10273
AC225363.3_FG004	NA	-1.17842	-1.87019
GRMZM2G102681	hypothetical protein SORBIDRAFT_04g032160	-1.17891	-1.14934
GRMZM2G054383	NA	-1.17918	-1.77181
GRMZM2G174246	alpha subunit of f-actin capping protein	-1.17964	-1.77158
GRMZM2G164202	pentatricopeptide repeat-containing protein	-1.17974	-1.71993
GRMZM2G345238	uncharacterized protein LOC100192906	-1.17992	-1.21505
GRMZM5G863344	ring-h2 finger protein	-1.18025	-1.26659
GRMZM2G135228	uncharacterized protein LOC100192582	-1.18116	-2.16146
GRMZM2G166686	uncharacterized protein LOC100384696	-1.18248	-1.7125
GRMZM2G068097	NA	-1.18306	-1.16467
GRMZM2G119999	homeodomain-leucine zipper transcription factor ipi-1	-1.18401	-1.28663
GRMZM5G856249	NA	-1.18486	-1.98311
AC185279.3_FG002	NA	-1.18497	-1.28134
GRMZM2G313175	NA	-1.18742	-1.49123
GRMZM5G871264	NA	-1.18755	-2.14636
GRMZM2G019771	glucan endo- -beta-glucosidase-like protein	-1.18776	-1.21914
GRMZM2G359589	NA	-1.18798	-1.5452
GRMZM2G062042	clathrin heavy chain 1-like	-1.18836	-2.05559
GRMZM2G157113	amp-binding protein	-1.18837	-1.67874
GRMZM2G316589	NA	-1.1898	-1.09338
GRMZM5G808423	NA	-1.19006	-1.79459
GRMZM5G815768	---NA---	-1.1912	-2.36439
GRMZM2G070704	NA	-1.19123	-2.31472
GRMZM2G124567	unknown	-1.19141	-1.24155
GRMZM5G837685	NA	-1.19148	-2.48028
GRMZM2G354801	NA	-1.1916	-1.74358
GRMZM2G038519	chlorophyll a-b binding protein	-1.19198	-1.83787
GRMZM2G053480	vip1 protein	-1.19253	-1.04986
GRMZM5G887077	kinesin heavy	-1.1927	-1.30785
GRMZM2G181312	NA	-1.19324	-2.10699
GRMZM2G350748	guanylyl cyclase	-1.19331	-1.1687
GRMZM2G356003	NA	-1.19357	-1.32547
GRMZM2G366843	transposon en spm sub-class	-1.19375	-1.10842
GRMZM2G024913	NA	-1.19383	-1.141
GRMZM2G070232	NA	-1.19386	-1.52546
AC194200.3_FG002	NA	-1.19405	-1.34622
GRMZM2G161959	NA	-1.19456	-1.98883
GRMZM2G168382	premnaspirodiene oxygenase-like	-1.19516	-2.31584
GRMZM2G018786	d-glycerate 3-kinase	-1.19546	-1.93252
GRMZM2G018721	wrky transcription factor 57	-1.1957	-1.59527
GRMZM2G391473	probable receptor-like protein kinase at5g20050-like	-1.19576	-2.03014
GRMZM2G035217	upf0496 protein at4g34320-like	-1.19615	-1.18691
GRMZM5G821369	NA	-1.1963	-1.53821
GRMZM2G006042	auxin response factor expressed	-1.19749	-1.41447
AC194405.3_FG021	NA	-1.19789	-1.44814
GRMZM2G010791	NA	-1.1982	-2.18285
GRMZM2G149022	NA	-1.19853	-2.17782
GRMZM2G532539	NA	-1.19977	-1.18715
GRMZM2G019907	bzip transcription factor	-1.2004	-1.45328
GRMZM2G113252	ternary complex factor-like	-1.20055	-1.31911
GRMZM2G107591	NA	-1.20077	-1.86019
AC188710.4_FG006	NA	-1.20078	-2.17683
GRMZM2G469764	NA	-1.20178	-2.1674
GRMZM2G096876	NA	-1.2025	-1.58786
GRMZM2G061568	phosphatidic acid phosphatase beta-like	-1.20297	-2.38153
GRMZM2G554885	NA	-1.20471	-2.19984
GRMZM2G054252	nac domain-containing protein 68	-1.20473	-1.73549
GRMZM2G310066	NA	-1.20489	-2.3551
GRMZM2G381188	NA	-1.20511	-1.07576
GRMZM2G035848	senescence-associated protein	-1.20611	-1.00166
GRMZM2G176940	NA	-1.20648	-1.88719
GRMZM2G456547	nucleoredoxin 3	-1.20699	-1.04914
GRMZM2G575361	NA	-1.20787	-1.79945
GRMZM2G077124	abscisic acid-insensitive 5-like protein 3	-1.20802	-1.24881
GRMZM5G860569	NA	-1.20943	-3.18217
GRMZM2G098290	plastid glutamine synthetase 2	-1.20975	-1.54976
GRMZM2G063298	auxin-regulated expressed	-1.21043	-1.30513
GRMZM2G467637	NA	-1.21158	-1.78227
GRMZM2G353091	e3 ubiquitin-protein ligase rf298-like	-1.21207	-1.55973
AC217690.3_FG003	NA	-1.21291	-1.29232
GRMZM5G864526	uncharacterized protein LOC100383646	-1.21346	-1.85246
GRMZM2G174949	regulator of chromosome condensation protein	-1.21408	-1.68089
GRMZM5G817777	gibberellin receptor gid1l2	-1.21414	-3.18189
GRMZM2G408949	NA	-1.21428	-1.1974
GRMZM5G811624	NA	-1.2146	-1.41463
GRMZM2G081612	NA	-1.21462	-1.08733
GRMZM2G162200	isco activase small isoform precursor	-1.21473	-1.77623
GRMZM2G413460	uncharacterized protein LOC100280327	-1.21504	-1.32701
GRMZM2G110266	NA	-1.21527	-1.15279
GRMZM5G823673	uncharacterized protein LOC100381845	-1.21641	-1.89976
GRMZM2G085845	flavonoid 3-monooxygenase	-1.21669	-2.1661
GRMZM2G149101	NA	-1.2167	-1.38535
AC184133.3_FG001	NA	-1.21701	-1.91866
AC205485.3_FG011	NA	-1.21739	-1.47301
GRMZM2G067350	4 1 protein	-1.21768	-1.66441
GRMZM2G128215	f-box protein interaction domain containing protein	-1.21778	-1.33309
GRMZM2G113875	NA	-1.21782	-1.0028
GRMZM5G879300	NA	-1.21833	-1.43121
GRMZM2G331317	NA	-1.2184	-2.50769
GRMZM2G180221	NA	-1.21856	-1.18688
GRMZM2G347762	NA	-1.21866	-1.45472
GRMZM2G383631	NA	-1.21872	-2.35516
GRMZM2G104639	plant integral membrane protein tigr01569 containing protein	-1.2195	-1.59782
GRMZM5G827354	NA	-1.22025	-2.61847
GRMZM2G045764	NA	-1.22113	-1.57661
GRMZM5G801427	NA	-1.22136	-1.50124
GRMZM2G061929	NA	-1.22205	-1.38515
GRMZM2G154056	uncharacterized protein LOC100501031	-1.22267	-2.54686
GRMZM2G152175	rossmann-fold nad -binding domain-containing protein	-1.22291	-1.45364
GRMZM2G492600	NA	-1.22317	-1.61645
GRMZM2G163905	unknown	-1.22333	-2.06727
AC207321.3_FG003	NA	-1.2234	-1.69269
GRMZM2G392148	NA	-1.22343	-1.99945
GRMZM2G354579	hypothetical protein SORBIDRAFT_05g000430	-1.22375	-1.77716
AC204596.3_FG004	NA	-1.22417	-1.32374
GRMZM2G561944	NA	-1.22431	-1.26772
GRMZM2G045102	NA	-1.22519	-4.22498
GRMZM2G026517	uncharacterized protein LOC100276206	-1.22722	-1.2916
AC212187.4_FG001	NA	-1.22736	-3.18894
GRMZM2G131405	NA	-1.2275	-1.80779
GRMZM2G563433	NA	-1.22757	-2.22996
GRMZM2G168502	nodulin 21 family expressed	-1.22837	-1.36362
GRMZM2G413788	NA	-1.22966	-1.61508
AC195608.3_FG005	NA	-1.22999	-1.70556
GRMZM2G092564	NA	-1.23157	-1.34157
GRMZM2G525770	NA	-1.23209	-1.55834
GRMZM2G176647	transducin wd40 domain-containing protein	-1.23221	-1.26443
GRMZM2G008032	NA	-1.23297	-2.08849
GRMZM2G537137	NA	-1.23313	-1.03789
GRMZM5G867731	NA	-1.23413	-1.50017
GRMZM2G085812	flavonoid 3 -hydroxylase 2-like	-1.2342	-1.51919
GRMZM2G127370	NA	-1.23491	-1.65674
GRMZM2G138268	iaa30 - auxin-responsive aux iaa family member	-1.23509	-1.19488
GRMZM2G081666	inward rectifying shaker k+ channel	-1.2358	-1.73849
GRMZM2G069551	NA	-1.23605	-1.61739
GRMZM2G386091	NA	-1.23622	-1.68399
AC204892.3_FG001	NA	-1.23675	-1.86427
GRMZM2G383059	NA	-1.23697	-1.41303
GRMZM2G072133	uncharacterized protein LOC100217029	-1.2372	-1.82912
GRMZM2G015610	catalytic protein phosphatase type 2c	-1.2372	-1.21851
AC190516.1_FG002	NA	-1.23725	-1.35789
GRMZM2G114503	NA	-1.23813	-1.78075
GRMZM5G899025	uncharacterized protein LOC100383176	-1.23851	-1.61163
GRMZM5G864273	NA	-1.24055	-1.52584
AC189038.3_FG004	NA	-1.24165	-1.23739
GRMZM2G095464	uncharacterized protein LOC100273785	-1.2424	-3.03238
GRMZM2G312732	uncharacterized protein LOC100279071	-1.24305	-1.25127
AC206493.3_FG001	NA	-1.24335	-1.76501
GRMZM2G703753	NA	-1.24352	-1.14589
GRMZM2G008730	chlorophyll a b-binding apoprotein cp26 precursor	-1.24461	-1.63172
GRMZM2G004523	btb poz domain-containing protein at5g67385-like	-1.24535	-1.65713
GRMZM2G173759	probable xyloglucan glycosyltransferase 5-like	-1.24553	-1.69793
GRMZM2G070883	NA	-1.24586	-1.81185
GRMZM2G519736	udp-glucose pyrophosphorylase	-1.2464	-1.43566
GRMZM2G001116	kinesin 4	-1.24648	-1.6417
GRMZM2G140591	NA	-1.24765	-1.14394
GRMZM2G004385	NA	-1.24835	-2.05628
GRMZM2G054938	hypothetical protein	-1.2485	-1.22651
GRMZM5G835117	NA	-1.24991	-1.22798
GRMZM2G088907	NA	-1.25015	-1.16466
GRMZM5G891425	uncharacterized protein LOC100381513	-1.25095	-1.81341
GRMZM2G100454	dual-specific kinase dsk1	-1.25175	-1.65504
GRMZM2G005732	pseudo-response regulator 37 splice variant a	-1.25221	-1.78438
GRMZM2G416388	cbs domain protein	-1.25348	-1.22239
GRMZM2G308856	NA	-1.25502	-2.80905
AC190761.3_FG002	NA	-1.25512	-2.33545
GRMZM2G428779	NA	-1.25577	-1.22876
GRMZM2G359320	NA	-1.25618	-2.82656
GRMZM2G461566	NA	-1.25757	-1.62942
GRMZM2G702081	NA	-1.25769	-2.00866
GRMZM2G416248	NA	-1.25795	-1.83661
GRMZM2G374327	NA	-1.25886	-1.25403
GRMZM5G892774	uncharacterized protein LOC100384339	-1.2605	-1.63132
GRMZM2G143426	uncharacterized protein LOC100384839 precursor	-1.26062	-1.26511
GRMZM2G039000	NA	-1.26095	-1.35137
GRMZM5G805931	NA	-1.26133	-1.97858
AC217553.3_FG009	NA	-1.2616	-1.65207
GRMZM2G088988	NA	-1.26188	-1.85198
GRMZM2G346599	NA	-1.2634	-1.82401
GRMZM2G130486	NA	-1.26433	-1.79721
GRMZM2G055168	NA	-1.26464	-2.84386
GRMZM2G018951	NA	-1.26488	-1.58577
GRMZM2G052920	NA	-1.26529	-2.59201
AC202534.2_FG002	NA	-1.26597	-1.78506
GRMZM2G316749	NA	-1.26619	-1.06319
GRMZM2G407495	hypothetical protein	-1.26654	-2.00707
GRMZM2G160002	NA	-1.26667	-2.83686
AC203326.3_FG002	NA	-1.26708	-1.83197
GRMZM2G342033	s-norcoclaurine synthase-like	-1.26831	-2.13658
GRMZM5G869530	NA	-1.26836	-1.61199
AC202091.4_FG005	NA	-1.26931	-1.10144
GRMZM2G009189	NA	-1.27059	-1.39106
GRMZM2G063961	serine threonine protein kinase sapk4	-1.27062	-1.51454
GRMZM2G313007	NA	-1.27084	-2.83047
GRMZM2G357112	harpin inducing protein	-1.2711	-1.24462
GRMZM2G123884	uncharacterized sodium-dependent transporter yocs-like	-1.27112	-1.50868
GRMZM2G478401	NA	-1.27269	-2.13691
GRMZM2G047956	uncharacterized protein LOC100216787 precursor	-1.27306	-1.64292
GRMZM2G094900	type i inositol- -trisphosphate 5-phosphatase cvp2-like	-1.27329	-1.84044
GRMZM2G138258	NA	-1.27341	-2.2768
GRMZM2G578860	NA	-1.27363	-2.69761
GRMZM2G536926	NA	-1.27401	-1.31034
GRMZM2G374460	NA	-1.27405	-2.26203
GRMZM2G021725	high-affinity potassium transporter	-1.2744	-1.30584
GRMZM5G854551	NA	-1.27457	-1.83764
GRMZM2G435294	myosin-h heavy chain-like	-1.27464	-2.84953
GRMZM2G019498	NA	-1.27477	-2.17191
GRMZM2G005146	auxin-repressed protein	-1.27575	-1.72269
GRMZM2G015805	Os03g0103800	-1.27596	-1.51525
GRMZM2G113594	NA	-1.27599	-1.65053
GRMZM2G344856	NA	-1.27605	-1.25467
AC191387.3_FG005	NA	-1.27621	-1.78743
GRMZM2G144346	zinc finger protein constans-like 16	-1.27625	-2.04592
GRMZM2G470467	NA	-1.27626	-2.12431
GRMZM2G344837	uncharacterized protein LOC100194036	-1.27635	-2.43535
GRMZM2G050360	NA	-1.27696	-1.90018
GRMZM2G078407	uncharacterized protein LOC100384502	-1.27788	-1.83645
GRMZM2G104220	uncharacterized protein LOC100502391	-1.27869	-1.9239
GRMZM2G351972	NA	-1.27991	-1.71323
AC212737.3_FG011	NA	-1.28008	-1.8609
GRMZM2G138155	NA	-1.28044	-2.62855
GRMZM2G162677	NA	-1.28263	-2.05672
AC197387.3_FG004	NA	-1.28269	-1.66882
GRMZM2G164318	beta-carotene hydroxylase 1	-1.28325	-1.7747
GRMZM2G504565	NA	-1.28426	-1.97163
GRMZM5G887958	NA	-1.28432	-1.96639
GRMZM2G002325	NA	-1.28559	-1.33229
GRMZM2G097607	NA	-1.28572	-1.53353
GRMZM2G042171	sulfate transporter	-1.28597	-1.70733
GRMZM2G129969	NA	-1.28685	-1.8538
GRMZM2G032625	NA	-1.28762	-2.18826
AC207628.4_FG005	NA	-1.28986	-2.84751
GRMZM2G006363	retrotransposon expressed	-1.29022	-2.07495
GRMZM2G110286	glutaredoxin-like protein	-1.29036	-1.66327
GRMZM2G006062	NA	-1.29095	-1.24623
GRMZM2G358365	NA	-1.29132	-2.36524
GRMZM2G038174	NA	-1.29192	-1.87182
GRMZM2G043921	serine-rich protein	-1.29301	-1.15534
GRMZM2G463028	transposon en spm sub-class	-1.29347	-2.00136
GRMZM2G157727	phytochrome a	-1.29354	-1.55759
GRMZM5G873765	uncharacterized protein LOC100278555	-1.29466	-1.78103
AC185304.4_FG008	NA	-1.29493	-1.68133
GRMZM2G144173	NA	-1.29561	-1.70064
GRMZM2G103382	glycerophosphoryl diester phosphodiesterase family protein	-1.29589	-1.65522
GRMZM2G352023	uncharacterized protein LOC100276584	-1.29594	-3.60249
GRMZM2G169584	nbs-lrr-like protein	-1.29672	-1.85436
GRMZM2G342010	NA	-1.29873	-1.1102
GRMZM2G012460	NA	-1.29916	-1.99184
GRMZM2G329222	abc transporter family protein	-1.29917	-1.28061
GRMZM2G004334	tpa_exp: homeodomain leucine zipper family iv protein	-1.29994	-1.86703
GRMZM2G471517	uncharacterized protein LOC100500994	-1.30047	-1.62567
GRMZM2G043873	NA	-1.3024	-1.80459
GRMZM2G110276	NA	-1.30268	-1.81168
GRMZM2G171648	NA	-1.30271	-1.72904
GRMZM2G413750	NA	-1.30319	-2.1331
GRMZM2G056743	NA	-1.30366	-1.75249
GRMZM2G082376	ring u-box domain-containing protein	-1.30419	-2.144
GRMZM5G828964	NA	-1.30477	-1.24759
GRMZM2G105523	pyrrolidone-carboxylate peptidase	-1.30495	-1.74968
GRMZM2G118992	enzyme of the cupin superfamily	-1.30508	-2.11085
GRMZM2G178741	homeobox-leucine zipper protein hat7	-1.30633	-1.24398
GRMZM2G102929	NA	-1.30656	-1.35535
GRMZM2G587168	NA	-1.30796	-2.08451
GRMZM2G067223	ww domain containing expressed	-1.30814	-1.96959
AC177922.2_FG002	NA	-1.30907	-2.29197
GRMZM2G087437	NA	-1.30983	-1.60636
AC214146.3_FG007	NA	-1.31035	-3.57207
AC204345.3_FG003	NA	-1.31122	-2.108
GRMZM2G358796	bzip protein	-1.31128	-1.27854
AC233850.1_FG003	NA	-1.31333	-1.59748
GRMZM2G181546	NA	-1.31379	-2.10281
GRMZM2G701407	NA	-1.31391	-1.31183
GRMZM2G497922	NA	-1.31422	-1.99354
GRMZM2G448701	hypothetical protein OsI_09826	-1.31443	-1.7023
GRMZM2G510885	NA	-1.31444	-1.60021
GRMZM2G124042	er glycerol-phosphate acyltransferase	-1.31802	-2.30996
GRMZM2G071664	NA	-1.31847	-1.84656
GRMZM2G181484	unknown	-1.31905	-1.37392
GRMZM2G099353	hypothetical protein	-1.32185	-1.2967
GRMZM2G086365	riboflavin biosynthesis protein chloroplastic-like	-1.32222	-1.48895
GRMZM5G803886	uncharacterized protein LOC100278533	-1.32226	-2.78986
GRMZM5G892271	NA	-1.32257	-2.02607
GRMZM2G049861	NA	-1.32286	-2.11936
AC194942.3_FG001	NA	-1.32354	-1.30517
GRMZM2G469486	NA	-1.32409	-1.62126
GRMZM2G144196	rna polymerase sigma factor rpod	-1.32477	-1.50965
GRMZM2G138291	NA	-1.32478	-1.91739
GRMZM2G120563	pollen-specific c2 domain containing protein	-1.32504	-1.66937
GRMZM2G105216	NA	-1.3262	-1.8114
GRMZM2G099580	60s ribosomal protein l7	-1.32648	-2.6246
GRMZM2G024653	NA	-1.32797	-1.41211
GRMZM2G099989	unknown	-1.32823	-1.97534
GRMZM2G380963	NA	-1.32844	-1.02784
GRMZM5G842877	NA	-1.32892	-2.05316
GRMZM2G351482	probable carboxylesterase 18-like	-1.32897	-1.62506
GRMZM2G571772	NA	-1.32917	-1.12842
GRMZM2G072280	chlorophyll a-b binding protein	-1.32934	-1.92124
GRMZM2G507210	NA	-1.32949	-2.28453
GRMZM2G023777	NA	-1.32963	-2.17412
GRMZM2G356256	uncharacterized protein LOC100194353 precursor	-1.32993	-2.30656
GRMZM2G700063	NA	-1.33029	-3.08433
GRMZM2G527752	NA	-1.33035	-2.30785
GRMZM2G132966	uncharacterized protein LOC100276876	-1.33043	-1.73491
AC231752.1_FG002	NA	-1.33173	-1.68271
GRMZM2G068519	hypothetical protein	-1.33284	-2.0156
GRMZM5G853948	NA	-1.33313	-1.22916
GRMZM2G081032	f-box protein pp2-a13-like	-1.33375	-1.14269
GRMZM2G145866	NA	-1.33451	-1.11494
GRMZM2G700192	uncharacterized protein LOC100216923	-1.3349	-1.30252
AC213378.3_FG006	NA	-1.33602	-1.32333
GRMZM2G016855	lactoylglutathione lyase family protein	-1.33643	-1.06364
GRMZM2G155216	chlorophyll a-b binding protein 1	-1.33689	-2.14956
GRMZM2G137710	serine threonine protein	-1.33805	-3.01731
GRMZM2G565661	NA	-1.33822	-1.79155
GRMZM2G159592	ap2 erf and b3 domain-containing transcription repressor tem1-like	-1.33915	-1.18905
GRMZM2G027054	NA	-1.33989	-1.3088
GRMZM2G026444	NA	-1.34034	-1.32843
GRMZM2G487778	NA	-1.34052	-3.19734
GRMZM2G474039	hypothetical protein SORBIDRAFT_06g030720	-1.34061	-1.18974
GRMZM2G371271	peptidyl-prolyl cis-trans isomerase cyp19-4-like	-1.34079	-1.95525
GRMZM2G100328	vesicle-associated membrane family protein	-1.34125	-1.55867
GRMZM2G018053	NA	-1.34186	-2.02835
GRMZM2G058036	NA	-1.34306	-1.86415
GRMZM2G464328	tetrapyrrole-binding chloroplastic-like	-1.34326	-2.11271
GRMZM5G843584	uncharacterized protein LOC100384657	-1.3433	-3.12671
GRMZM2G053368	NA	-1.34549	-2.28409
GRMZM2G151444	wrky transcription factor	-1.34554	-1.22509
GRMZM2G097457	cytosolic orthophosphate dikinase	-1.3458	-1.52252
GRMZM2G525967	NA	-1.34615	-2.44483
GRMZM2G082290	NA	-1.34632	-2.32637
AC213981.3_FG001	NA	-1.34642	-2.40776
GRMZM2G301642	dna binding	-1.34662	-1.74734
GRMZM2G439195	nicotianamine synthase 3	-1.34744	-1.41399
GRMZM2G143367	uncharacterized protein LOC100272938	-1.34768	-1.63034
GRMZM2G321053	NA	-1.34829	-2.01895
AC211474.3_FG006	NA	-1.34862	-1.02551
GRMZM2G538218	NA	-1.34903	-1.02934
GRMZM2G111770	nac domain-containing protein 8-like	-1.34919	-1.34666
GRMZM2G102860	NA	-1.35015	-2.50478
GRMZM2G123896	auxin-repressed kda protein	-1.35069	-1.54599
GRMZM2G448174	cytochrome f	-1.35135	-1.89038
GRMZM2G174210	protein mks1-like	-1.3514	-2.07067
GRMZM2G175535	NA	-1.3518	-1.58549
GRMZM5G836309	NA	-1.35216	-1.96477
GRMZM2G341918	callose synthase	-1.35224	-1.2504
GRMZM2G074109	NA	-1.35227	-1.74487
AC203956.3_FG004	NA	-1.35229	-1.33676
GRMZM2G317356	NA	-1.35436	-2.33531
GRMZM2G340297	NA	-1.35462	-1.76122
GRMZM2G058301	NA	-1.35545	-1.70635
GRMZM2G145632	uncharacterized protein LOC100502160	-1.35548	-1.92208
AC195351.3_FG001	NA	-1.35552	-1.8816
GRMZM2G317460	NA	-1.35566	-1.70892
GRMZM2G101932	dna binding	-1.35569	-1.3363
GRMZM2G083915	NA	-1.35635	-2.06611
GRMZM2G479906	pdr-type abc transporter 9	-1.35668	-1.44218
AC184832.2_FG002	NA	-1.35696	-1.76912
GRMZM2G143996	NA	-1.3579	-1.13712
GRMZM2G058989	NA	-1.35856	-1.52164
GRMZM5G891468	NA	-1.35997	-1.15222
GRMZM2G104021	NA	-1.36064	-2.28906
GRMZM5G893059	NA	-1.36214	-1.50555
GRMZM5G896621	NA	-1.36327	-2.37021
GRMZM2G169259	NA	-1.36395	-3.34263
GRMZM2G053991	protein aluminum sensitive 3	-1.36429	-1.53947
GRMZM5G865819	xyloglucan galactosyltransferase katamari1 homolog	-1.36436	-2.92341
GRMZM2G536004	NA	-1.36446	-1.86673
GRMZM2G348884	NA	-1.3648	-1.03863
GRMZM2G049716	NA	-1.36587	-1.58407
GRMZM2G412604	nicotianamine aminotransferase	-1.36599	-2.23418
GRMZM2G180559	af466204_5 protein	-1.36668	-1.32094
GRMZM2G142321	NA	-1.36671	-2.25724
GRMZM2G098346	alcohol dehydrogenase	-1.36674	-1.60886
AC234155.1_FG002	NA	-1.36689	-1.11588
GRMZM2G019356	at5g51550 k17n15_10	-1.36701	-1.46594
GRMZM2G145211	NA	-1.36717	-2.36944
GRMZM2G489235	NA	-1.36771	-3.14741
GRMZM2G076241	NA	-1.36807	-2.36089
GRMZM2G170586	uncharacterized protein LOC100191805	-1.3687	-2.34128
GRMZM2G179181	NA	-1.36959	-1.56802
GRMZM2G516348	NA	-1.36962	-2.32575
GRMZM2G333033	heme-binding-like protein chloroplastic-like	-1.36972	-1.60536
GRMZM2G477180	NA	-1.37085	-2.34822
GRMZM2G043369	NA	-1.3711	-2.1981
GRMZM2G487883	NA	-1.37116	-1.1264
GRMZM2G369444	NA	-1.37131	-1.18129
GRMZM2G470524	udp-glucose glucosyltransferase	-1.37216	-1.77474
GRMZM2G012636	auxin induced protein	-1.37245	-2.35752
GRMZM2G039212	hypothetical protein SORBIDRAFT_10g003240	-1.37348	-1.33672
AC233898.1_FG003	NA	-1.37369	-2.34236
AC212015.4_FG003	NA	-1.37386	-2.3325
GRMZM2G375696	hypothetical protein SORBIDRAFT_03g031300	-1.37404	-2.34816
GRMZM2G301932	NA	-1.37408	-2.2442
GRMZM2G424147	lachrymatory-factor synthase	-1.37414	-1.31059
GRMZM5G800232	NA	-1.3757	-1.56294
GRMZM2G459484	NA	-1.37573	-2.21987
GRMZM2G370521	NA	-1.37622	-1.34055
GRMZM2G518533	NA	-1.37764	-2.37874
GRMZM2G074728	NA	-1.37869	-1.35788
GRMZM2G140448	c99a1_sorbi ame: full=cytochrome p450 cyp99a1	-1.37887	-1.94444
GRMZM2G126460	NA	-1.37889	-1.89052
GRMZM2G026024	phosphoribulokinase precursor	-1.37914	-2.24025
GRMZM2G151516	hypothetical protein	-1.38023	-1.2904
GRMZM2G048181	NA	-1.38023	-1.81787
GRMZM2G085641	NA	-1.38096	-1.68887
GRMZM2G346367	NA	-1.38126	-1.74037
GRMZM2G153562	NA	-1.38303	-2.35023
GRMZM2G448259	NA	-1.38332	-1.0486
GRMZM5G837563	NA	-1.38402	-1.83917
GRMZM2G378607	NA	-1.38556	-1.60107
GRMZM2G576662	NA	-1.38595	-2.36514
AC203971.3_FG005	NA	-1.38705	-3.75057
GRMZM2G396073	NA	-1.38759	-1.36655
GRMZM5G869291	NA	-1.38808	-2.34375
GRMZM5G847550	NA	-1.38879	-1.90545
GRMZM2G124119	NA	-1.38893	-2.36737
GRMZM5G821668	uncharacterized protein LOC100384072 precursor	-1.38898	-1.03872
AC207895.3_FG002	NA	-1.39002	-1.80944
GRMZM2G020210	NA	-1.39097	-2.25634
GRMZM5G885480	NA	-1.39108	-1.90765
GRMZM2G580982	NA	-1.39298	-2.28632
AC194966.3_FG002	NA	-1.39372	-1.48002
GRMZM2G147840	hypothetical protein SORBIDRAFT_03g003180	-1.39387	-1.79087
GRMZM2G166083	NA	-1.39479	-2.34921
GRMZM2G533008	NA	-1.39515	-1.36626
GRMZM2G429274	wd40-repeat protein	-1.39539	-2.38422
GRMZM5G896053	NA	-1.39543	-1.53276
GRMZM2G136100	uncharacterized protein LOC100384729	-1.39574	-2.18447
GRMZM2G048121	deoxymugineic acid synthase1	-1.39578	-2.51542
GRMZM2G174177	NA	-1.39611	-1.3811
GRMZM2G314171	dead-box atp-dependent rna helicase 18-like	-1.39651	-2.30637
GRMZM2G017157	wall-associated kinase 4-like	-1.39654	-1.90937
GRMZM2G005482	NA	-1.39664	-3.36676
AC188296.3_FG005	NA	-1.3973	-2.35889
GRMZM2G026184	NA	-1.39796	-1.16989
GRMZM2G033401	NA	-1.39812	-1.52332
GRMZM5G815128	NA	-1.39879	-1.39565
GRMZM2G167676	NA	-1.39925	-1.36881
GRMZM2G527017	uncharacterized protein LOC100383628	-1.40099	-2.32737
GRMZM2G140317	uncharacterized protein LOC100216787 precursor	-1.402	-2.37731
GRMZM2G311624	NA	-1.40206	-1.76647
AC206429.3_FG002	NA	-1.40229	-1.66976
AC208308.3_FG003	NA	-1.40235	-1.70488
GRMZM2G043002	NA	-1.40253	-1.89564
GRMZM2G132616	NA	-1.4029	-1.38295
GRMZM2G301652	NA	-1.40327	-2.9696
GRMZM2G079499	gpi-anchored protein	-1.40359	-1.92156
GRMZM2G351729	dnaj heat shock protein	-1.40363	-1.38596
AC188752.3_FG011	NA	-1.40367	-1.5354
GRMZM2G318633	salicylic acid-induced fragment 1 protein	-1.40455	-1.10588
GRMZM2G473694	NA	-1.40584	-2.76104
GRMZM5G884486	NA	-1.4073	-2.09402
GRMZM5G838971	NA	-1.40769	-1.70682
GRMZM2G327094	NA	-1.40857	-1.19345
GRMZM2G162307	NA	-1.40896	-2.54126
GRMZM2G040128	NA	-1.4095	-1.24888
GRMZM2G334763	NA	-1.40988	-1.56885
GRMZM2G513222	NA	-1.41068	-1.81008
GRMZM2G130242	NA	-1.41088	-1.40121
GRMZM2G434363	NA	-1.41139	-1.38681
GRMZM2G461230	hypothetical protein SORBIDRAFT_05g020880	-1.41167	-1.38353
GRMZM2G093708	uncharacterized protein LOC100273850	-1.41193	-2.14087
GRMZM2G434935	hypothetical protein SORBIDRAFT_10g028690	-1.41229	-1.43668
GRMZM2G136313	u-box domain-containing protein 15-like	-1.41253	-1.39615
GRMZM2G093684	NA	-1.41532	-1.63171
GRMZM2G008979	NA	-1.41554	-1.89623
GRMZM2G445904	uncharacterized protein LOC100192982	-1.4164	-1.78852
GRMZM2G124428	NA	-1.41651	-2.71511
GRMZM2G400602	oligopeptide transporter	-1.41665	-1.74227
GRMZM2G077872	NA	-1.41673	-1.82504
GRMZM2G440695	kinase interacting protein 1	-1.41702	-2.38919
GRMZM2G317386	metalloendoproteinase 1	-1.41738	-1.68403
GRMZM5G843869	NA	-1.41771	-1.55134
GRMZM2G048463	NA	-1.4179	-1.66503
GRMZM2G344498	NA	-1.41832	-1.24161
GRMZM2G162614	NA	-1.4185	-1.92105
AC204313.3_FG002	NA	-1.41929	-1.40327
GRMZM2G070847	uncharacterized protein LOC100275335	-1.41956	-2.11464
GRMZM2G009065	uncharacterized protein LOC100272308	-1.41968	-1.97563
GRMZM2G366520	probable purine permease 4-like	-1.41982	-1.52217
GRMZM2G001572	NA	-1.4199	-1.43585
GRMZM2G326753	NA	-1.42127	-1.73556
GRMZM2G000775	NA	-1.42127	-2.36355
GRMZM2G100003	NA	-1.42292	-2.10874
GRMZM2G114080	NA	-1.42348	-1.83616
GRMZM2G162527	retinol dehydrogenase	-1.42357	-2.0695
GRMZM2G109327	uncharacterized protein LOC100279830	-1.42382	-1.35174
GRMZM2G487208	NA	-1.42411	-1.51065
GRMZM2G123774	uncharacterized protein LOC100272695	-1.425	-1.82187
GRMZM2G172794	alpha beta-hydrolase domain-containing protein	-1.42514	-2.1752
AC177924.2_FG003	NA	-1.42517	-1.01492
GRMZM5G819982	NA	-1.42604	-2.27933
GRMZM2G552314	NA	-1.42671	-2.39962
GRMZM2G059097	NA	-1.42869	-1.31158
GRMZM2G117216	NA	-1.42947	-1.57938
GRMZM2G114479	NA	-1.43127	-3.01413
GRMZM2G159768	NA	-1.43179	-1.97042
GRMZM5G803594	NA	-1.43192	-1.41732
GRMZM2G505197	NA	-1.43286	-1.70701
GRMZM2G058155	myosin-h heavy chain-like	-1.43319	-1.56697
AC211154.4_FG002	NA	-1.43484	-1.02331
GRMZM2G539066	NA	-1.4349	-2.46702
GRMZM2G025477	uncharacterized protein LOC100273599	-1.43578	-2.17724
GRMZM2G034958	gdsl esterase lipase	-1.4368	-2.15459
GRMZM2G703510	NA	-1.43714	-1.65468
GRMZM2G130053	cysteine protease	-1.43745	-1.74901
GRMZM2G056478	NA	-1.43794	-1.42475
GRMZM5G806586	uncharacterized protein LOC100502242	-1.43836	-2.08022
GRMZM2G431006	glycosyltransferase-like protein	-1.43878	-2.62316
GRMZM2G701781	NA	-1.43927	-2.60544
GRMZM2G022162	transcription factor	-1.43957	-1.53932
GRMZM2G506919	NA	-1.43974	-1.46436
GRMZM2G455290	NA	-1.44047	-2.04991
GRMZM2G301647	serine threonine kinase	-1.44086	-3.50358
GRMZM2G351977	chlorophyll a-b binding protein 2	-1.44089	-1.92054
GRMZM2G514814	NA	-1.44102	-1.25085
GRMZM2G393983	NA	-1.44112	-2.06322
GRMZM2G468428	adenylate cyclase	-1.4413	-3.01812
AC186902.4_FG001	NA	-1.44153	-2.26858
GRMZM2G068989	uncharacterized protein LOC100274109	-1.44193	-2.07457
GRMZM2G358161	aquaporin nip3-1	-1.4423	-2.05832
GRMZM2G443308	hypothetical protein SORBIDRAFT_08g022350	-1.44274	-1.27626
GRMZM2G421655	atp-dependent dna helicase	-1.44337	-1.77501
GRMZM2G119328	NA	-1.4455	-2.99057
AC191567.3_FG002	NA	-1.44867	-1.57941
GRMZM2G576752	wall-associated kinase 4	-1.44872	-1.80791
AC206199.3_FG005	NA	-1.44935	-2.77335
GRMZM2G340048	cysteine-rich receptor-like protein kinase 10-like	-1.44991	-1.27576
GRMZM2G173261	NA	-1.4503	-1.42842
GRMZM2G039780	NA	-1.45037	-1.21664
GRMZM2G464176	NA	-1.4509	-1.02403
GRMZM2G081343	NA	-1.45118	-2.26213
GRMZM2G323024	magnesium chelatase h subunit	-1.45188	-2.31574
GRMZM2G309479	hypothetical protein	-1.45241	-2.46838
AC193423.3_FG003	NA	-1.45267	-1.45254
GRMZM2G469477	NA	-1.45299	-1.13437
GRMZM2G152079	hypothetical protein SORBIDRAFT_06g002520	-1.45404	-1.8189
GRMZM2G500106	NA	-1.4545	-2.06279
GRMZM2G395247	hypothetical protein SORBIDRAFT_07g022445	-1.45496	-1.02293
GRMZM2G470302	hypothetical protein SORBIDRAFT_03g001035	-1.45548	-2.02108
GRMZM2G397433	NA	-1.45679	-1.21619
GRMZM2G310552	NA	-1.45716	-1.70478
GRMZM2G150995	NA	-1.45819	-1.58755
GRMZM2G076370	major facilitator superfamily expressed	-1.45854	-1.57919
GRMZM2G448547	NA	-1.45896	-3.01936
GRMZM2G300424	uncharacterized protein LOC100192063	-1.45904	-2.13043
GRMZM2G452996	saur family protein	-1.45924	-1.427
GRMZM2G137669	NA	-1.45928	-2.28684
GRMZM2G563627	NA	-1.46043	-1.88847
GRMZM5G806661	NA	-1.46098	-2.45965
GRMZM2G351232	purple acid phosphatase 1	-1.46121	-1.44794
GRMZM2G412161	NA	-1.46156	-2.31773
GRMZM2G150084	NA	-1.4627	-1.76227
GRMZM2G332801	NA	-1.46359	-1.88867
AC190788.2_FG004	NA	-1.46456	-2.0801
GRMZM2G499255	NA	-1.46486	-1.17557
GRMZM2G567199	NA	-1.46553	-3.02394
GRMZM5G872499	pho1-like protein	-1.46752	-1.2342
AC235539.1_FG001	NA	-1.46753	-3.28451
GRMZM2G048136	myb family transcription expressed	-1.46815	-1.5586
GRMZM2G148133	uncharacterized protein LOC100279718	-1.46839	-1.45151
GRMZM2G162453	subtilisin-like protease-like	-1.47176	-1.55677
GRMZM2G348743	NA	-1.47246	-3.03572
GRMZM2G535791	NA	-1.47252	-1.45637
GRMZM2G170181	NA	-1.47405	-1.47796
GRMZM2G325259	NA	-1.47434	-2.04214
GRMZM2G454483	NA	-1.4744	-2.01764
GRMZM2G133539	NA	-1.47474	-1.44338
GRMZM2G404682	heavy metal transport detoxification protein	-1.47575	-3.03528
GRMZM5G866911	NA	-1.47698	-1.07312
GRMZM2G400806	pyruvate dehydrogenase	-1.47744	-2.03099
GRMZM2G700249	NA	-1.47759	-1.3386
GRMZM2G471160	NA	-1.47811	-2.044
GRMZM2G096968	NA	-1.47878	-2.02169
GRMZM2G374812	hexose carrier protein hex6	-1.47971	-1.58047
GRMZM2G047763	uncharacterized protein LOC100216923	-1.48039	-2.29562
GRMZM2G320132	NA	-1.48223	-2.31896
GRMZM2G140101	NA	-1.48228	-2.30926
AC202109.2_FG005	NA	-1.48277	-2.02574
GRMZM2G026780	uncharacterized protein LOC100274767	-1.48399	-2.30715
GRMZM2G004946	pattern formation protein emb30-like	-1.48523	-1.74721
GRMZM2G363630	NA	-1.48583	-2.04601
GRMZM2G085945	zinc finger protein	-1.48671	-1.56593
GRMZM5G854446	NA	-1.48793	-1.05887
GRMZM2G148675	NA	-1.48847	-2.22168
AC197267.3_FG001	NA	-1.48984	-1.91619
AC225993.1_FG004	NA	-1.49193	-1.95309
GRMZM2G118729	NA	-1.49215	-1.49221
GRMZM2G353834	NA	-1.49273	-2.26472
GRMZM2G102494	uncharacterized protein LOC100272279	-1.49288	-1.45949
GRMZM2G010460	probable ubiquitin-conjugating enzyme e2 25-like	-1.49323	-1.65446
GRMZM2G043154	10-deacetylbaccatin iii 10-o-acetyltransferase	-1.49326	-1.62393
GRMZM2G700046	uncharacterized protein LOC100272236	-1.49332	-2.26558
GRMZM2G531818	NA	-1.49389	-1.81886
GRMZM2G370581	NA	-1.49581	-1.28979
GRMZM2G339909	leucine zipper	-1.49867	-1.1182
GRMZM5G898259	NA	-1.49917	-2.06181
GRMZM2G144083	heavy metal p-type atpase	-1.49999	-1.63624
GRMZM5G872533	NA	-1.50063	-1.75399
GRMZM2G080364	NA	-1.50068	-2.48081
GRMZM2G052193	uncharacterized protein LOC100502476	-1.50244	-2.70207
GRMZM2G474258	cct motif family protein	-1.50385	-1.47596
GRMZM2G327206	NA	-1.50398	-1.62322
GRMZM2G362778	ubiquitin carboxyl-terminal hydrolase 25-like	-1.50467	-1.69059
GRMZM2G467695	tpr domain containing expressed	-1.50496	-1.47935
GRMZM2G013753	NA	-1.50518	-1.84358
AC194232.3_FG001	NA	-1.50919	-1.86021
GRMZM2G565600	NA	-1.50935	-2.24174
GRMZM2G081268	NA	-1.5119	-2.07815
GRMZM2G135075	NA	-1.51268	-2.25137
AC199961.4_FG001	NA	-1.51388	-1.90902
GRMZM2G097093	NA	-1.51447	-1.5204
GRMZM2G413943	amino acid expressed	-1.51454	-1.19831
GRMZM2G131243	nadph hc toxin reductase	-1.51521	-2.27706
GRMZM2G126920	f-box protein at4g10400-like	-1.5164	-1.73403
GRMZM5G854880	phytosulfokine receptor precursor	-1.51983	-2.21622
AC204940.3_FG005	NA	-1.51987	-3.3196
GRMZM2G175082	agmatine coumaroyltransferase	-1.52045	-1.10535
GRMZM5G810368	NA	-1.52124	-1.06811
GRMZM2G519421	NA	-1.52489	-1.56989
GRMZM2G426175	iron ascorbate-dependent oxidoreductase	-1.52533	-1.97013
GRMZM2G393988	NA	-1.52627	-2.13566
GRMZM2G021058	NA	-1.52685	-3.08358
GRMZM2G001081	NA	-1.52721	-1.24332
GRMZM2G585079	NA	-1.52725	-2.20404
AC197047.3_FG001	NA	-1.53077	-1.28743
GRMZM5G844909	NA	-1.53192	-1.51391
GRMZM2G014988	uncharacterized protein LOC100191775	-1.53243	-2.05229
GRMZM2G089970	NA	-1.53263	-1.68462
GRMZM2G058531	phototropic-responsive nph3-like protein	-1.5339	-1.34288
GRMZM2G173710	histidine-containing phosphotransfer protein 4	-1.53394	-1.6152
GRMZM2G449941	NA	-1.53458	-2.2183
GRMZM5G828053	NA	-1.53471	-1.39219
GRMZM2G416544	histone h2a	-1.5348	-1.18903
GRMZM2G527144	NA	-1.5362	-4.25478
GRMZM5G895731	NA	-1.53822	-1.86715
GRMZM2G476937	NA	-1.53889	-1.5223
GRMZM2G078704	NA	-1.53949	-1.58131
GRMZM2G039246	histidine-containing phosphotransfer protein 4	-1.54077	-1.56696
GRMZM2G085246	protein strubbelig-receptor family 3-like	-1.54173	-1.79472
GRMZM2G408256	uncharacterized protein LOC100279463	-1.54231	-2.25891
GRMZM5G829680	NA	-1.54284	-3.10279
GRMZM2G507678	NA	-1.54461	-1.77126
GRMZM2G081383	NA	-1.54684	-2.17132
GRMZM2G700936	NA	-1.54754	-3.83276
GRMZM2G389625	uncharacterized protein LOC100279483	-1.54853	-2.41418
GRMZM2G039094	math domain-containing protein at5g43560-like	-1.54877	-1.89318
GRMZM2G546118	NA	-1.54897	-1.25989
GRMZM2G486561	NA	-1.54987	-2.54068
GRMZM2G484980	NA	-1.55107	-2.38784
GRMZM2G416796	NA	-1.5524	-2.43879
GRMZM2G165616	NA	-1.55288	-2.87309
GRMZM2G145772	serine threonine-protein kinase ulk4-like	-1.55292	-1.14566
GRMZM2G065197	NA	-1.55359	-1.04596
AC209669.4_FG004	NA	-1.55439	-1.02639
GRMZM2G368350	vacuolar protein sorting-associated protein 9a-like	-1.55598	-1.55357
GRMZM2G026026	NA	-1.55794	-1.95528
GRMZM2G133041	NA	-1.55801	-4.55106
GRMZM2G012923	monosaccharide-sensing protein 2-like	-1.55822	-1.82704
GRMZM5G867581	NA	-1.55897	-2.54909
GRMZM2G344001	uncharacterized protein LOC100216699	-1.56056	-1.5364
GRMZM2G419915	NA	-1.5608	-1.29108
GRMZM2G445752	NA	-1.56188	-4.13702
GRMZM2G159481	NA	-1.56233	-1.50604
GRMZM2G052761	NA	-1.56426	-1.93163
AC193645.3_FG008	NA	-1.56435	-3.17831
GRMZM2G435536	NA	-1.56488	-3.27603
GRMZM2G025880	phototropic-responsive nph3-like protein	-1.5651	-1.13944
GRMZM2G448398	NA	-1.56605	-1.85874
GRMZM2G051808	NA	-1.56611	-2.12526
AC190734.2_FG006	NA	-1.56623	-1.39495
GRMZM2G081358	NA	-1.56635	-1.57729
GRMZM2G128923	NA	-1.56743	-3.00248
GRMZM2G474337	NA	-1.57021	-1.28207
GRMZM2G163459	hypothetical protein SORBIDRAFT_09g023660	-1.57255	-1.37385
GRMZM2G057100	NA	-1.57281	-1.5635
GRMZM2G414562	NA	-1.57331	-2.43773
GRMZM2G059103	NA	-1.57383	-1.33494
GRMZM2G031904	hypothetical protein	-1.57552	-2.23744
GRMZM2G025459	snf1-related protein kinase regulatory subunit beta-1	-1.57564	-1.42606
AC205708.3_FG001	NA	-1.57616	-1.13005
GRMZM2G067450	transposon en spm sub-class	-1.57671	-1.5899
GRMZM2G403789	g-type lectin s-receptor-like serine threonine-protein kinase at2g19130-like	-1.5781	-2.56048
GRMZM2G061137	NA	-1.57853	-2.57107
GRMZM5G815063	NA	-1.57919	-2.56443
AC196007.2_FG006	NA	-1.57948	-1.57422
AC209944.5_FG013	NA	-1.57965	-1.64096
GRMZM2G160192	NA	-1.57969	-1.54672
GRMZM2G508789	NA	-1.57997	-1.38238
GRMZM2G411766	transcription factor wrky08-like	-1.58123	-2.23539
GRMZM2G480050	cle family 306 protein	-1.58188	-1.55865
GRMZM2G176433	uncharacterized protein LOC100275307 precursor	-1.58351	-1.08044
GRMZM2G129493	polygalacturonase inhibitor 1 precursor	-1.58367	-2.31263
GRMZM2G095654	NA	-1.58411	-2.57627
AC187262.4_FG007	NA	-1.58499	-1.16003
EF517601.1_FG003	NA	-1.58512	-2.07615
GRMZM2G040706	NA	-1.58691	-2.15003
GRMZM2G068947	12-oxophytodienoic acid reductase	-1.58744	-2.30714
GRMZM5G897067	snf1-related protein kinase regulatory subunit gamma-like pv42a-like	-1.58768	-1.583
GRMZM2G084944	uncharacterized membrane protein yjcl-like	-1.58801	-1.57894
GRMZM2G147366	NA	-1.58815	-1.97332
GRMZM2G086935	NA	-1.5885	-1.54999
GRMZM2G557434	NA	-1.59004	-2.55658
GRMZM2G580871	NA	-1.5904	-1.98422
GRMZM2G123450	leucine-rich repeat receptor protein kinase exs precursor	-1.59118	-1.5638
GRMZM5G804251	uncharacterized protein LOC100384438 precursor	-1.59119	-1.99898
GRMZM2G579782	NA	-1.59157	-1.48924
GRMZM2G385564	NA	-1.5931	-2.34043
GRMZM2G165255	casp-like protein at2g38480-like	-1.59383	-2.03011
GRMZM2G463191	NA	-1.59399	-1.57001
AC199054.3_FG003	NA	-1.59417	-1.6212
GRMZM5G801627	nucleic acid binding protein	-1.59424	-1.16699
GRMZM2G134442	NA	-1.59499	-2.28987
AC217311.3_FG007	NA	-1.59654	-1.54695
GRMZM2G583828	NA	-1.59749	-3.0547
GRMZM5G875073	NA	-1.59783	-2.19594
AC207732.3_FG010	NA	-1.59797	-1.55754
GRMZM2G323413	NA	-1.59954	-2.22931
GRMZM2G006371	NA	-1.6013	-1.16491
GRMZM2G079491	uncharacterized protein LOC100383195	-1.60182	-1.95139
GRMZM2G307529	at5g54540 mrb17_4	-1.60424	-1.60124
GRMZM2G355773	histone h3	-1.60432	-1.56104
GRMZM2G091086	NA	-1.60742	-1.61095
GRMZM2G086250	NA	-1.60769	-2.59311
GRMZM2G417690	NA	-1.60793	-1.57497
GRMZM5G824811	NA	-1.60794	-1.57489
GRMZM2G306042	NA	-1.6085	-1.00597
GRMZM2G423565	NA	-1.61122	-3.19401
AC233888.1_FG001	NA	-1.61252	-2.05738
GRMZM2G502709	NA	-1.61252	-1.17865
GRMZM2G157675	seven-transmembrane-domain protein 1	-1.6134	-2.03601
GRMZM2G008651	hypothetical protein	-1.61357	-1.56995
GRMZM2G117039	NA	-1.61372	-1.56662
GRMZM2G117806	NA	-1.61397	-1.37175
AC226331.2_FG001	NA	-1.61435	-1.57999
GRMZM2G011115	hypersensitive-induced response protein	-1.61459	-2.19635
GRMZM2G145051	wall-associated kinase 4	-1.6149	-1.59081
GRMZM5G851710	NA	-1.61492	-1.60768
GRMZM2G466289	NA	-1.61607	-1.61515
GRMZM2G482946	NA	-1.61646	-2.69504
GRMZM2G083182	abc transporter family protein	-1.61757	-1.5824
GRMZM2G014114	NA	-1.61768	-2.68254
GRMZM2G327782	NA	-1.61822	-1.6342
GRMZM2G070315	tyrosine specific protein phosphatase family protein	-1.61888	-1.61928
GRMZM2G165601	uncharacterized protein LOC100279103	-1.61978	-3.43352
GRMZM2G576692	NA	-1.61988	-1.57893
GRMZM2G040555	exosome complex exonuclease rrp42	-1.62041	-1.58129
GRMZM5G859799	NA	-1.62062	-1.59683
GRMZM5G892333	NA	-1.621	-2.39528
GRMZM2G178734	plastidic phosphate translocator-like protein1	-1.62163	-1.00678
GRMZM2G394846	NA	-1.62173	-1.73831
GRMZM2G048430	ripening-related protein	-1.62174	-2.08666
AC196727.2_FG001	NA	-1.62182	-1.10823
GRMZM5G856981	NA	-1.62224	-2.17191
AC197721.3_FG001	NA	-1.62231	-1.57035
GRMZM2G152447	purple acid phosphatase 1	-1.62279	-2.06164
GRMZM2G578024	NA	-1.62322	-1.59526
GRMZM2G386294	uncharacterized protein LOC100192962	-1.62327	-2.06993
GRMZM2G052563	NA	-1.62374	-1.62456
GRMZM5G888334	NA	-1.62381	-2.58345
GRMZM2G125947	dead-box atp-dependent rna helicase 18-like	-1.62414	-1.01183
GRMZM2G427625	NA	-1.62434	-1.61318
GRMZM5G817422	zinc knuckle domain containing	-1.62585	-1.28428
GRMZM2G700121	NA	-1.62594	-1.61439
GRMZM2G093913	NA	-1.62602	-2.17738
GRMZM2G318578	NA	-1.62636	-1.00935
GRMZM2G494548	NA	-1.62756	-1.87595
GRMZM5G890783	uncharacterized protein LOC100279463	-1.62851	-2.83567
AC214046.4_FG005	NA	-1.62862	-1.20842
GRMZM2G151096	NA	-1.62879	-1.39136
GRMZM2G125284	NA	-1.62994	-1.62388
GRMZM2G546369	cyclin delta-2	-1.63007	-2.20061
GRMZM5G811042	NA	-1.63015	-2.09965
GRMZM5G899506	NA	-1.63027	-1.65003
GRMZM2G382435	NA	-1.63043	-2.46657
GRMZM2G130938	NA	-1.63122	-1.00821
GRMZM2G174218	NA	-1.6313	-1.58772
GRMZM2G073059	kynurenine formamidase-like	-1.63402	-2.13792
GRMZM2G528567	NA	-1.63452	-1.019
GRMZM2G142751	transcription factor tcp14-like	-1.63557	-1.76119
GRMZM2G357443	exo70 exocyst complex subunit family protein	-1.6359	-2.4362
GRMZM2G380765	NA	-1.63673	-2.91083
GRMZM2G040987	NA	-1.63699	-1.59324
GRMZM5G842101	NA	-1.63723	-1.60713
AC212732.4_FG005	NA	-1.6374	-1.92007
GRMZM2G081626	vacuolar processing enzyme 4	-1.63807	-1.86967
GRMZM5G896905	NA	-1.63925	-2.29275
AC214139.3_FG008	NA	-1.63952	-1.63876
GRMZM5G837732	NA	-1.63966	-1.67104
GRMZM2G175576	heavy metal transporter 3	-1.64175	-1.64884
GRMZM2G487008	NA	-1.64218	-1.54771
GRMZM2G451347	NA	-1.64242	-2.03856
GRMZM5G826830	NA	-1.64244	-2.32364
GRMZM2G081387	adenylate kinase	-1.64397	-1.60555
AC188735.3_FG001	NA	-1.64405	-1.60491
GRMZM2G494505	NA	-1.64517	-1.45493
GRMZM2G392139	NA	-1.64549	-2.66338
GRMZM5G865162	uncharacterized protein LOC100384854	-1.64676	-1.80552
GRMZM2G485313	NA	-1.64706	-2.29899
GRMZM2G352912	NA	-1.64717	-1.20896
GRMZM5G869286	uncharacterized protein LOC100275500	-1.64724	-1.39666
GRMZM2G109340	NA	-1.64815	-3.21035
GRMZM2G462904	NA	-1.64838	-1.03877
GRMZM5G805641	NA	-1.64842	-1.62323
GRMZM5G862643	uncharacterized protein LOC100501755	-1.64856	-1.59699
GRMZM2G036508	hypothetical protein SORBIDRAFT_08g005030	-1.64876	-1.6023
GRMZM2G107521	hypothetical protein SORBIDRAFT_07g004635	-1.64887	-1.60529
GRMZM2G004974	NA	-1.64903	-1.60895
GRMZM2G078480	NA	-1.65031	-2.00577
GRMZM5G872992	NA	-1.65045	-1.60847
GRMZM5G822902	NA	-1.65126	-2.55473
GRMZM2G702526	NA	-1.65134	-1.03235
GRMZM2G353250	unknow protein	-1.65282	-1.16994
GRMZM2G362926	uncharacterized protein LOC100273951	-1.65292	-1.63484
GRMZM2G327177	NA	-1.6533	-1.61738
AC199328.3_FG001	NA	-1.65364	-2.4047
GRMZM2G058986	NA	-1.65374	-1.98887
GRMZM2G416322	cysteine-rich receptor-like protein kinase 25-like	-1.65378	-2.19086
AC198386.3_FG001	NA	-1.65387	-1.06742
GRMZM2G430518	NA	-1.6551	-2.20952
GRMZM2G173674	phosphoglucosamine mutase family protein	-1.65591	-2.01627
GRMZM2G172411	NA	-1.65673	-1.04769
GRMZM2G081180	NA	-1.65728	-3.04712
GRMZM2G390041	aldo keto reductase family expressed	-1.65745	-2.20926
GRMZM2G023644	NA	-1.6577	-1.6354
AC189797.4_FG001	NA	-1.65791	-1.62843
GRMZM2G110913	lob domain-containing protein 18-like	-1.65806	-1.6348
GRMZM2G176946	NA	-1.65823	-1.61483
GRMZM2G452332	NA	-1.65845	-2.62908
GRMZM2G352359	probable pectinesterase pectinesterase inhibitor 58-like	-1.65863	-1.64235
GRMZM2G701177	NA	-1.65904	-1.61547
GRMZM2G580313	NA	-1.65926	-1.63283
AC201746.4_FG001	NA	-1.65993	-1.61243
GRMZM2G085576	NA	-1.66124	-1.62962
GRMZM2G413422	uncharacterized protein LOC100280327	-1.66161	-2.36776
GRMZM2G395061	trichome birefringence-like 13 protein	-1.66299	-1.06364
GRMZM2G342164	NA	-1.6631	-2.64418
GRMZM2G016909	NA	-1.66374	-1.64342
GRMZM2G581457	NA	-1.66419	-1.34393
GRMZM2G176426	NA	-1.66437	-1.62524
GRMZM2G316858	NA	-1.66578	-1.62831
GRMZM2G002473	wall-associated serine threonine kinase	-1.6662	-1.62792
AC212369.5_FG008	NA	-1.66631	-1.62303
GRMZM2G000584	NA	-1.66662	-1.6204
GRMZM5G837318	Os01g0946800	-1.66678	-2.24497
GRMZM2G534373	NA	-1.66732	-2.62543
GRMZM2G071883	beta-galactosidase precursor	-1.66752	-1.65606
GRMZM2G099340	metallothionein-like protein type 2	-1.66828	-1.57439
GRMZM2G135877	multidrug and toxin extrusion protein 1-like	-1.66852	-1.86615
AC194163.3_FG003	NA	-1.66864	-1.62512
GRMZM2G346095	chalcone synthase	-1.66884	-1.68771
GRMZM2G076582	NA	-1.66937	-1.64325
AC199492.3_FG004	NA	-1.66948	-1.64322
GRMZM2G352941	NA	-1.67067	-1.6239
GRMZM2G536341	NA	-1.67071	-1.59962
GRMZM2G550247	NA	-1.67079	-1.22063
AC234522.1_FG006	NA	-1.67088	-1.63075
GRMZM5G808843	NA	-1.67266	-1.72588
AC195828.3_FG002	NA	-1.67316	-1.6216
GRMZM2G406400	NA	-1.67356	-1.8559
GRMZM2G568748	NA	-1.67366	-1.64195
GRMZM2G165377	NA	-1.67502	-1.55371
GRMZM5G837443	NA	-1.67616	-1.9276
AC202900.3_FG001	NA	-1.677	-2.8916
GRMZM2G089812	nuclear transcription factor y subunit c-1	-1.67712	-2.16959
AC204399.3_FG003	NA	-1.6779	-1.52655
GRMZM2G421565	udp-galactose translocator	-1.6784	-1.65631
GRMZM2G123986	tpr domain containing expressed	-1.67877	-3.15555
GRMZM2G020329	ring-h2 finger protein atl32-like	-1.67941	-1.99193
GRMZM2G173048	NA	-1.68001	-2.25451
GRMZM2G023122	NA	-1.68042	-3.42562
GRMZM2G319450	NA	-1.68054	-2.63892
GRMZM2G105991	anthocyanidin -o-glucosyltransferase-like	-1.68103	-2.28898
GRMZM2G025726	NA	-1.68456	-2.66088
GRMZM2G093258	NA	-1.68459	-1.63842
GRMZM2G080111	ocs element-binding factor 1	-1.68501	-2.67916
GRMZM2G178706	NA	-1.68516	-2.60256
GRMZM2G135706	u-box domain-containing protein 4-like	-1.68597	-1.09834
GRMZM2G475905	NA	-1.68803	-1.96554
GRMZM5G842848	NA	-1.68825	-1.8096
GRMZM5G871521	NA	-1.69239	-2.67254
GRMZM2G017754	NA	-1.6928	-1.94384
GRMZM2G408263	NA	-1.69331	-2.25016
GRMZM2G037327	mip tip subfamily	-1.69398	-1.79827
GRMZM2G551472	NA	-1.69751	-1.11582
AC211907.3_FG006	NA	-1.69776	-3.73573
GRMZM2G409086	f-box domain containing protein	-1.69892	-1.21322
GRMZM2G465617	protein aatf	-1.70099	-1.6577
GRMZM2G176354	NA	-1.70198	-1.83757
GRMZM2G073969	hypothetical protein SORBIDRAFT_01g035830	-1.7023	-1.28455
GRMZM2G083558	NA	-1.70485	-1.64191
GRMZM5G831634	NA	-1.705	-1.66676
GRMZM2G086179	NA	-1.70531	-1.68149
GRMZM2G093466	NA	-1.70643	-1.95793
GRMZM2G306919	neutral amino acid transport protein	-1.70656	-2.07804
GRMZM2G328669	NA	-1.70796	-2.60079
AC200506.4_FG002	NA	-1.70813	-1.37589
GRMZM2G058173	undecaprenyl pyrophosphate synthetase	-1.70925	-1.73618
GRMZM5G827798	dna polymerase i 3 -5 exo domain	-1.71025	-1.111
GRMZM2G110332	uncharacterized protein LOC100381932	-1.71027	-2.11287
AC208429.3_FG004	NA	-1.71032	-1.68697
GRMZM5G844514	NA	-1.71163	-2.22127
GRMZM2G162461	sec14-like 3 protein	-1.71304	-2.28905
GRMZM2G134503	NA	-1.71328	-1.71604
GRMZM2G502289	NA	-1.71409	-1.66751
GRMZM2G162845	glyceraldehyde-3-phosphate dehydrogenase	-1.7145	-2.02417
GRMZM2G046267	hypothetical protein SORBIDRAFT_01g004410	-1.71762	-1.97253
GRMZM2G034877	protein kinase domain containing expressed	-1.71848	-1.71252
GRMZM2G040950	NA	-1.72047	-1.62733
AC215187.3_FG003	NA	-1.72063	-1.648
GRMZM2G176057	NA	-1.72109	-1.95459
GRMZM2G520229	NA	-1.72242	-1.67796
GRMZM2G484596	NA	-1.72244	-2.0558
GRMZM5G848080	NA	-1.72375	-2.10339
GRMZM2G155281	metal ion binding	-1.72406	-1.65334
GRMZM2G064250	NA	-1.72549	-2.44334
GRMZM2G049349	sterol regulatory element-binding protein site 2	-1.72601	-1.91022
GRMZM2G123940	serine carboxypeptidase-like 45	-1.72603	-1.11721
GRMZM2G543511	NA	-1.72952	-1.55038
GRMZM2G025159	unknown	-1.72992	-2.56692
GRMZM2G032528	uncharacterized protein LOC100193906	-1.73019	-1.90708
GRMZM2G099304	NA	-1.73037	-1.29642
GRMZM2G539448	NA	-1.73086	-1.68428
GRMZM2G413810	NA	-1.73176	-2.0611
AC226445.2_FG002	NA	-1.73331	-1.38917
GRMZM2G169571	nbs-lrr-like protein	-1.73592	-1.59087
GRMZM2G702522	uncharacterized protein LOC100216923	-1.73595	-2.32082
GRMZM2G348748	NA	-1.73702	-1.33991
GRMZM2G497096	NA	-1.73798	-1.82576
GRMZM2G127134	probable peptide nitrate transporter at1g59740-like	-1.73798	-2.7621
GRMZM2G147942	subtilisin-like protease-like	-1.73842	-1.96304
GRMZM2G380286	gmc oxidoreductase family expressed	-1.74004	-1.5899
GRMZM2G120421	NA	-1.74168	-2.64599
AC233966.1_FG003	NA	-1.74308	-3.74684
GRMZM2G104581	---NA---	-1.74326	-1.99106
GRMZM2G407032	abc transporter family protein	-1.74327	-3.88823
GRMZM2G440258	NA	-1.74388	-2.72926
GRMZM5G841915	NA	-1.74512	-1.72849
GRMZM2G068682	pollen-specific protein ntp303 precursor	-1.74583	-1.71254
GRMZM2G339327	NA	-1.74909	-1.6843
GRMZM2G076272	bel1-related homeotic protein 13	-1.74912	-3.2316
GRMZM2G498849	NA	-1.753	-1.57135
GRMZM5G835157	NA	-1.75326	-2.47014
GRMZM2G588130	NA	-1.75352	-1.0666
AC198651.3_FG009	NA	-1.75373	-1.71456
GRMZM2G358070	NA	-1.75412	-1.39459
GRMZM2G314832	NA	-1.75595	-1.02902
GRMZM2G099705	NA	-1.75813	-1.74995
GRMZM2G164281	NA	-1.75893	-2.83941
GRMZM2G138176	f-box protein fbl2	-1.76177	-2.23308
GRMZM2G496933	NA	-1.76181	-2.05566
GRMZM5G844525	NA	-1.76299	-1.67055
GRMZM2G493164	NA	-1.76365	-2.75371
GRMZM2G468298	NA	-1.76469	-1.43126
GRMZM2G566694	NA	-1.76629	-1.77256
AC233785.2_FG001	NA	-1.76707	-2.57899
GRMZM2G700969	NA	-1.76886	-1.42509
GRMZM2G065829	uncharacterized protein LOC100194332	-1.76924	-1.43224
GRMZM2G121264	NA	-1.77252	-2.03508
GRMZM5G843748	peroxidase	-1.77349	-2.17547
GRMZM2G415751	adenylate isopentenyltransferase	-1.77422	-2.31578
GRMZM2G013920	NA	-1.77451	-2.74985
GRMZM2G571424	NA	-1.7749	-2.05404
GRMZM2G106443	indole-3-acetate beta-glucosyltransferase	-1.77497	-2.43499
GRMZM5G891944	uncharacterized protein LOC100382148	-1.77678	-2.1355
AC191927.2_FG003	NA	-1.77826	-1.22629
GRMZM2G503589	NA	-1.78239	-1.00231
GRMZM2G304049	lz-nbs-lrr class rga	-1.78249	-1.08436
AC197362.3_FG002	NA	-1.7858	-2.35722
GRMZM5G877821	NA	-1.78626	-1.75606
AC214793.3_FG002	NA	-1.78711	-3.82667
GRMZM2G419239	transcription factor myb42	-1.78889	-1.29587
GRMZM5G892723	NA	-1.79028	-1.7659
GRMZM2G054921	uncharacterized protein LOC100216699	-1.79056	-2.36192
GRMZM2G022691	NA	-1.79119	-1.3644
GRMZM2G034876	growth-regulating factor 1	-1.79254	-3.01316
GRMZM2G148768	NA	-1.79372	-1.9501
AC212567.3_FG003	NA	-1.79445	-2.36881
GRMZM2G052902	serine threonine protein kinase	-1.79454	-2.18732
GRMZM2G105941	NA	-1.79587	-3.3472
GRMZM2G148099	hypothetical protein SORBIDRAFT_09g007290	-1.79623	-1.72389
GRMZM2G538067	NA	-1.79639	-2.57305
GRMZM2G509072	NA	-1.79888	-1.01714
GRMZM2G136353	receptor-like protein kinase hsl1-like	-1.80053	-1.6033
GRMZM2G030465	iaa9 - auxin-responsive aux iaa family member	-1.80162	-1.28708
GRMZM2G004909	lipid transfer protein	-1.80256	-1.9917
GRMZM2G152279	NA	-1.80319	-2.48421
AC199961.4_FG004	NA	-1.80414	-1.78394
GRMZM2G055684	subtilisin-like protease	-1.80525	-2.55762
GRMZM2G357457	NA	-1.80591	-1.2039
GRMZM2G025440	NA	-1.80721	-1.36093
GRMZM2G167076	NA	-1.80794	-1.69803
AC203986.3_FG013	NA	-1.80842	-2.94015
GRMZM2G500150	NA	-1.80965	-1.53424
GRMZM2G052011	f-box kelch-repeat protein at1g55270-like	-1.81002	-1.43876
GRMZM2G429188	NA	-1.81184	-2.78613
GRMZM2G425148	hypothetical protein SORBIDRAFT_09g030970	-1.81214	-3.78257
GRMZM2G115108	NA	-1.81462	-2.80948
AC193338.3_FG007	NA	-1.81686	-2.88298
GRMZM2G164397	NA	-1.81783	-1.94789
GRMZM2G121300	NA	-1.8182	-1.80087
GRMZM2G165308	uncharacterized protein LOC100272626	-1.81822	-3.12386
AC217841.3_FG001	NA	-1.82221	-2.80909
GRMZM2G700011	NA	-1.8242	-1.98758
GRMZM5G805973	NA	-1.82563	-3.30587
GRMZM5G836332	uncharacterized protein LOC100192962	-1.82733	-2.41069
GRMZM2G036354	NA	-1.8275	-2.9323
GRMZM2G015612	NA	-1.82751	-2.45053
GRMZM2G113272	uncharacterized protein LOC100273988	-1.82934	-3.134
GRMZM2G354525	cell division control protein 50	-1.82937	-2.12207
GRMZM2G330049	cipk-like protein 1	-1.83155	-1.42206
GRMZM2G121427	atp-dependent dna helicase	-1.83284	-1.24626
GRMZM2G100020	protein brevis radix-like	-1.83776	-1.51485
GRMZM5G851655	hypothetical protein SORBIDRAFT_04g036730	-1.8378	-1.27407
GRMZM2G069905	hypothetical protein	-1.83835	-1.82485
GRMZM5G803510	NA	-1.84054	-4.1283
GRMZM2G051787	uncharacterized protein LOC100304397	-1.84067	-1.59836
GRMZM2G001621	NA	-1.84584	-1.34827
GRMZM5G804181	NA	-1.84627	-2.14739
GRMZM2G577429	NA	-1.84627	-3.81888
GRMZM2G465953	uncharacterized protein LOC100278665	-1.84727	-3.59634
GRMZM2G349886	NA	-1.84839	-2.80496
GRMZM2G458596	NA	-1.85106	-1.84512
GRMZM2G373168	NA	-1.85192	-1.24066
AC204051.3_FG001	NA	-1.85219	-2.83075
GRMZM2G399112	hypothetical protein SORBIDRAFT_04g032340	-1.85392	-2.12089
GRMZM2G178136	hypothetical protein SORBIDRAFT_02g000580	-1.85797	-4.41177
AC204551.3_FG002	NA	-1.85869	-1.86065
GRMZM5G815705	NA	-1.86018	-2.6809
GRMZM5G866602	NA	-1.86184	-1.75855
GRMZM2G005971	NA	-1.86274	-2.00172
GRMZM2G590450	NA	-1.86315	-3.52113
GRMZM2G077895	negatively light-regulated expressed	-1.86339	-1.01776
GRMZM2G105319	magnesium chelatase h subunit	-1.86505	-1.84013
GRMZM2G050599	NA	-1.86551	-1.97096
AC216246.2_FG002	NA	-1.8677	-1.25166
GRMZM2G384884	NA	-1.86784	-1.82608
GRMZM5G897710	NA	-1.86796	-1.77731
AC217443.3_FG007	NA	-1.868	-1.50603
GRMZM2G035863	NA	-1.86816	-2.27889
GRMZM2G071536	NA	-1.86831	-1.61926
GRMZM2G455642	endo- -beta-glucanase precursor	-1.86898	-2.23532
GRMZM2G425920	transcription factor hy5	-1.8697	-1.70446
GRMZM2G117603	actin depolymerizing	-1.8731	-1.85394
GRMZM2G037128	NA	-1.87416	-2.62759
GRMZM5G890988	NA	-1.87508	-1.88374
GRMZM2G377194	n-terminal domain containing expressed	-1.8763	-2.85088
GRMZM2G079790	uncharacterized protein LOC100384184	-1.87669	-2.35256
GRMZM2G316775	uncharacterized protein LOC100272311	-1.87706	-1.86354
GRMZM2G145059	enzyme of the cupin superfamily	-1.87709	-2.59178
GRMZM2G144421	saur family protein	-1.88021	-1.74326
GRMZM2G423137	at3g61870 f21f14_40	-1.88031	-2.0531
GRMZM2G001877	NA	-1.88135	-1.85907
GRMZM2G116742	NA	-1.88183	-1.47483
AC205063.3_FG009	NA	-1.88228	-1.84344
GRMZM2G030350	plant-specific domain tigr01615 family protein	-1.88297	-2.19269
AC207223.3_FG005	NA	-1.8858	-2.83293
GRMZM5G816632	NA	-1.88865	-2.12435
GRMZM2G379463	NA	-1.88891	-2.61679
AC194937.3_FG004	NA	-1.88923	-2.13135
GRMZM2G082855	transmembrane protein kinase	-1.88957	-2.13924
AC182606.4_FG001	NA	-1.89275	-2.85258
GRMZM2G472307	NA	-1.89319	-1.97352
GRMZM5G835745	NA	-1.89443	-1.55906
GRMZM2G112951	uncharacterized protein LOC100193075	-1.89472	-2.74558
GRMZM2G043415	probable pectinesterase pectinesterase inhibitor 13-like	-1.89748	-1.77732
GRMZM2G537730	NA	-1.90487	-2.16916
GRMZM2G143759	uncharacterized protein LOC100272695	-1.91499	-2.20499
GRMZM2G016004	NA	-1.91708	-2.73834
GRMZM2G316758	transcription factor bhlh66	-1.91787	-1.37025
GRMZM5G829072	NA	-1.91848	-2.15645
GRMZM2G161399	NA	-1.91911	-2.21726
GRMZM2G497094	NA	-1.92236	-1.6845
GRMZM2G336213	NA	-1.92251	-3.46567
GRMZM2G153543	NA	-1.92506	-1.31804
GRMZM2G322819	prolyl endopeptidase-like	-1.93167	-4.04257
GRMZM2G440918	probable ubiquitin-conjugating enzyme e2 25-like	-1.93491	-2.90501
GRMZM2G353755	NA	-1.93581	-1.42481
GRMZM2G096536	NA	-1.93695	-2.04416
GRMZM2G137954	bidirectional sugar transporter sweet4-like	-1.93875	-1.12345
GRMZM2G467123	major facilitator superfamily expressed	-1.94504	-2.05298
GRMZM2G134277	uncharacterized protein LOC100384175	-1.95147	-2.93016
GRMZM5G811950	NA	-1.95405	-1.01371
GRMZM2G403774	NA	-1.95467	-3.22594
GRMZM2G017237	type i inositol- -trisphosphate 5-phosphatase cvp2-like	-1.96174	-2.14043
AC208930.3_FG007	NA	-1.96348	-2.47804
GRMZM2G101125	vacuolar amino acid transporter 1-like	-1.96468	-1.79674
AC216269.3_FG002	NA	-1.96577	-1.07684
GRMZM2G005341	NA	-1.96715	-1.97604
GRMZM2G704020	NA	-1.97362	-2.19682
GRMZM2G047265	ribonuclease p-like protein	-1.97523	-1.61171
GRMZM2G159965	NA	-1.97841	-1.97305
GRMZM2G023332	NA	-1.9792	-2.24846
GRMZM2G068707	uncharacterized protein LOC100273425	-1.97984	-2.26186
AC214238.4_FG004	NA	-1.98432	-2.00538
GRMZM2G137532	bzip protein	-1.98463	-2.58416
GRMZM2G493155	pentatricopeptide repeat-containing protein mitochondrial-like	-1.98767	-1.98385
GRMZM5G806833	teosinte glume architecture 1	-1.98834	-2.30452
GRMZM5G892921	NA	-1.98882	-1.9746
GRMZM5G871049	NA	-1.99166	-3.55145
GRMZM2G060330	NA	-1.9933	-2.29709
GRMZM2G118706	NA	-1.99435	-2.18956
GRMZM2G031870	myb-like dna-binding shaqkyf class family expressed	-1.99758	-1.70651
GRMZM2G430371	NA	-1.99905	-2.2602
AC217252.3_FG005	NA	-2.00015	-1.02964
AC196983.3_FG005	NA	-2.00107	-2.03702
GRMZM2G053230	NA	-2.00405	-2.60748
GRMZM2G505524	NA	-2.00501	-4.40485
AC198177.3_FG001	NA	-2.00636	-3.00576
AC186284.3_FG008	NA	-2.00735	-2.03286
GRMZM2G020423	jasmonate-induced protein	-2.00794	-3.51724
GRMZM2G403007	nonspecific lipid-transfer protein precursor	-2.00909	-1.9852
GRMZM2G090227	NA	-2.01038	-1.9671
GRMZM2G498547	hypothetical protein	-2.01243	-1.20132
GRMZM2G028084	NA	-2.01294	-1.961
GRMZM2G033236	NA	-2.01466	-2.5441
GRMZM2G133512	dna-directed rna polymerase d subunit 2a-like	-2.01596	-1.59556
GRMZM2G354117	NA	-2.01637	-1.29757
GRMZM5G897944	uncharacterized protein LOC100274850	-2.01656	-2.68997
GRMZM2G308619	protein kinase g11a-like	-2.01678	-1.99439
GRMZM2G080829	NA	-2.02243	-1.86511
GRMZM2G071744	uncharacterized protein LOC100192613	-2.02277	-2.03453
GRMZM5G881739	NA	-2.02319	-2.04028
GRMZM2G105256	probable pre-mrna-splicing factor atp-dependent rna helicase-like	-2.0256	-2.03515
GRMZM2G517459	NA	-2.02664	-1.0046
GRMZM2G704112	NA	-2.02756	-3.0924
GRMZM2G137083	uncharacterized protein LOC100276777	-2.02836	-1.04106
GRMZM2G000889	NA	-2.03164	-1.85027
GRMZM2G060596	uncharacterized protein LOC100501031	-2.03852	-2.0135
GRMZM5G835362	NA	-2.03876	-1.97361
GRMZM2G148404	uncharacterized protein LOC100381686	-2.03881	-2.07142
GRMZM2G110597	NA	-2.04017	-2.08012
AC186592.3_FG002	NA	-2.04069	-2.00256
GRMZM2G088384	NA	-2.04114	-1.59728
GRMZM2G570814	NA	-2.04169	-2.23176
GRMZM2G580355	NA	-2.04189	-2.06507
GRMZM2G317679	NA	-2.04214	-1.57069
GRMZM2G128928	NA	-2.04372	-3.02051
GRMZM2G499034	NA	-2.04437	-2.01727
AC212206.3_FG002	NA	-2.04479	-1.99792
GRMZM2G353921	NA	-2.04495	-2.02219
AC194630.3_FG002	NA	-2.04523	-1.01558
GRMZM2G025903	probable disease resistance protein rdl5 rf45-like	-2.04549	-1.01843
GRMZM2G008239	NA	-2.04562	-1.42614
GRMZM5G862276	NA	-2.04608	-2.41618
GRMZM5G891626	NA	-2.0487	-2.08025
GRMZM2G046532	flower-specific gamma-thionin precursor	-2.04958	-3.04099
GRMZM2G181286	NA	-2.04969	-2.05445
AC220970.4_FG001	NA	-2.04992	-2.04752
GRMZM2G430530	NA	-2.04997	-2.63662
GRMZM2G149221	NA	-2.04998	-2.01503
GRMZM2G097048	NA	-2.0503	-1.92919
GRMZM5G815715	NA	-2.05037	-2.00878
GRMZM2G121621	NA	-2.0504	-1.8467
AC189078.3_FG004	NA	-2.05089	-3.59346
GRMZM2G070079	NA	-2.05129	-2.07293
GRMZM2G013018	NA	-2.05226	-2.01413
GRMZM2G156307	plant-specific domain tigr01570 family protein	-2.0524	-1.01584
GRMZM2G152584	NA	-2.05254	-1.01645
GRMZM2G038851	ubiquitin-conjugating enzyme e2 i	-2.05316	-2.05533
GRMZM5G821433	glyceraldehyde-3-phosphate dehydrogenase	-2.05747	-1.77198
GRMZM2G006841	jasmonate-induced protein	-2.05756	-2.01639
GRMZM2G087184	NA	-2.05768	-2.01433
GRMZM2G057346	NA	-2.05799	-2.01416
GRMZM2G074372	NA	-2.05807	-1.01415
GRMZM2G069127	NA	-2.05845	-3.03861
GRMZM2G033228	hypothetical protein SORBIDRAFT_07g028065	-2.0585	-1.03117
AC203160.3_FG001	NA	-2.05867	-2.02557
AC213629.3_FG010	NA	-2.06004	-2.01618
AC211705.3_FG001	NA	-2.06107	-1.03899
GRMZM2G122044	NA	-2.0642	-1.02471
GRMZM2G395757	NA	-2.06468	-1.03193
GRMZM2G474944	NA	-2.06479	-1.02134
GRMZM2G466944	NA	-2.06489	-1.04021
GRMZM2G317996	NA	-2.06495	-1.44351
GRMZM2G100526	NA	-2.06528	-2.02718
GRMZM2G414244	NA	-2.06552	-1.02115
GRMZM5G812245	NA	-2.06824	-1.47413
GRMZM2G021248	NA	-2.06884	-1.59239
GRMZM2G515580	uncharacterized protein LOC100193388	-2.06889	-2.03474
GRMZM2G034927	hypothetical protein SORBIDRAFT_03g042170	-2.06928	-1.0296
AC200322.4_FG013	NA	-2.07026	-1.01185
GRMZM2G127720	hypothetical protein	-2.071	-2.02569
GRMZM2G047312	NA	-2.07116	-1.14646
GRMZM2G106618	nucleoside- expressed	-2.07157	-2.03423
GRMZM2G085495	NA	-2.07271	-1.03916
GRMZM2G139445	NA	-2.0735	-3.61462
AC196158.3_FG002	NA	-2.07439	-1.88132
GRMZM5G821613	NA	-2.07639	-3.36643
AC182417.4_FG002	NA	-2.08498	-2.05222
GRMZM2G378739	NA	-2.08506	-1.48431
GRMZM2G035767	malate cytoplasmic	-2.08506	-2.05198
GRMZM2G006902	NA	-2.08552	-2.41032
GRMZM2G148198	swib domain-containing protein	-2.08643	-2.06558
GRMZM2G375123	NA	-2.08644	-1.09688
GRMZM5G850856	NA	-2.0868	-2.06493
GRMZM2G539257	NA	-2.09012	-1.77621
GRMZM2G096331	lrr binding protein	-2.09036	-2.5886
GRMZM5G843994	NA	-2.09107	-2.06604
GRMZM2G073865	hypothetical protein	-2.09206	-1.05597
AC205713.4_FG008	NA	-2.09225	-1.10391
GRMZM2G129298	NA	-2.09263	-2.07367
GRMZM2G536679	NA	-2.09289	-2.04076
GRMZM2G167442	NA	-2.09291	-1.0649
GRMZM2G120621	cytochrome p450 family expressed	-2.09324	-1.19495
GRMZM2G070005	NA	-2.09483	-3.07619
GRMZM2G020514	uncharacterized protein LOC100276989	-2.09498	-2.89072
GRMZM2G323082	NA	-2.09539	-1.06424
GRMZM2G383352	NA	-2.09676	-1.0661
GRMZM2G326755	NA	-2.09696	-2.08525
GRMZM2G352310	NA	-2.09697	-1.32469
AC200670.3_FG003	NA	-2.09801	-2.09308
GRMZM2G560348	NA	-2.09817	-2.31496
GRMZM2G145420	NA	-2.10137	-2.07141
GRMZM2G313020	regulator of nonsense transcripts-like protein	-2.10153	-1.99596
GRMZM2G423767	NA	-2.10164	-2.09188
GRMZM5G871000	uncharacterized protein LOC100382956	-2.10229	-2.94709
GRMZM5G850924	uncharacterized protein LOC100384271	-2.10263	-2.79137
GRMZM2G114044	af361857_1 at2g46220	-2.10368	-2.35571
GRMZM2G584967	NA	-2.10573	-1.73102
GRMZM2G704279	NA	-2.10854	-1.08457
GRMZM2G144163	NA	-2.1205	-1.49395
GRMZM2G571026	NA	-2.12201	-2.1479
GRMZM2G341197	NA	-2.12279	-4.11074
GRMZM2G468495	serine-threonine protein plant-	-2.12348	-2.10629
AC206349.2_FG005	NA	-2.1246	-1.09613
GRMZM2G094353	rna-binding protein cabeza	-2.12974	-1.92637
GRMZM2G110369	2 -deoxymugineic-acid 2 -dioxygenase-like	-2.13066	-4.00088
GRMZM2G042364	nodulin-like protein	-2.13101	-2.98022
GRMZM2G524213	NA	-2.13211	-2.44607
GRMZM5G842990	histone deacetylase 2b	-2.13248	-2.09398
GRMZM2G054304	uncharacterized protein LOC100193388	-2.133	-1.90882
GRMZM5G817536	NA	-2.13449	-1.09221
GRMZM2G159575	NA	-2.13582	-2.53647
AC215638.3_FG003	NA	-2.13632	-1.09438
GRMZM2G130912	NA	-2.13876	-1.95566
GRMZM5G866647	NA	-2.13979	-1.09614
AC194045.3_FG001	NA	-2.14394	-2.16992
GRMZM2G383937	NA	-2.14491	-2.09961
GRMZM5G828168	NA	-2.14676	-1.94947
GRMZM2G522983	NA	-2.14803	-2.11396
GRMZM2G167176	NA	-2.14945	-2.39298
GRMZM2G061126	uncharacterized protein LOC100275365	-2.1497	-2.60798
GRMZM2G142672	oxysterol-binding protein	-2.14977	-3.14268
AC191623.3_FG007	NA	-2.1499	-1.09683
GRMZM5G811633	u-box domain-containing protein	-2.15535	-2.73492
GRMZM5G834568	NA	-2.15883	-1.80227
GRMZM2G160672	NA	-2.16248	-3.51729
GRMZM2G477418	NA	-2.16488	-2.139
GRMZM2G036040	NA	-2.16771	-1.16901
GRMZM2G038046	aspartic proteinase nepenthesin-1-like	-2.16807	-4.15153
GRMZM2G019819	protein phosphatase 2c	-2.17145	-1.53421
GRMZM2G391951	uncharacterized protein LOC100192063	-2.17174	-5.14955
GRMZM2G115062	NA	-2.17551	-1.73204
GRMZM2G150363	carotenoid cleavage dioxygenase 4	-2.17694	-2.54341
GRMZM2G146298	uncharacterized protein LOC100216699	-2.1773	-2.42259
GRMZM5G823882	NA	-2.17733	-1.80072
GRMZM2G003762	stem-specific protein expressed	-2.18356	-2.18473
GRMZM2G142802	stem-specific protein tsjt1-like	-2.18569	-2.50987
GRMZM2G154178	beta-expansin 4 precursor	-2.18791	-2.14723
GRMZM2G000842	basic leucine zipper protein	-2.19366	-2.17623
GRMZM2G118495	serine threonine protein kinase	-2.20246	-1.18798
GRMZM2G416105	hypothetical protein SORBIDRAFT_09g001890	-2.20337	-1.6043
GRMZM2G161405	NA	-2.20517	-1.33732
GRMZM5G819313	NA	-2.20668	-2.56681
GRMZM2G179480	NA	-2.20944	-1.20327
GRMZM2G009289	NA	-2.2109	-3.19324
GRMZM2G346153	NA	-2.21296	-2.1854
GRMZM2G083538	amino acid binding	-2.21462	-2.83694
GRMZM2G325653	mlo-like protein 5-like	-2.21546	-1.1973
GRMZM2G141986	NA	-2.21958	-1.18662
GRMZM2G060723	btb poz ankyrin repeat protein	-2.22528	-2.73037
GRMZM2G508015	NA	-2.22638	-1.34049
GRMZM2G181291	uncharacterized protein LOC100216699	-2.22789	-2.87449
GRMZM2G379629	NA	-2.22956	-1.83843
GRMZM2G085297	NA	-2.23521	-1.93904
GRMZM2G387843	NA	-2.2383	-2.22674
AC198899.3_FG004	NA	-2.24093	-2.2122
AC190762.3_FG006	NA	-2.24242	-1.83003
GRMZM5G837231	NA	-2.25122	-2.64117
AC207618.3_FG005	NA	-2.25228	-3.24573
GRMZM2G333029	uncharacterized protein LOC100303985	-2.25419	-3.22729
GRMZM2G054358	NA	-2.25672	-1.83515
GRMZM2G509652	NA	-2.26253	-1.49716
GRMZM2G087592	NA	-2.26386	-2.80681
GRMZM5G870296	NA	-2.26934	-3.13053
GRMZM2G074307	uncharacterized protein LOC100275365	-2.27237	-2.73984
GRMZM2G126555	monosaccharide-sensing protein 2-like	-2.27451	-3.05974
GRMZM5G894363	NA	-2.27899	-2.11649
GRMZM2G135314	uncharacterized protein LOC100275578	-2.2799	-1.68552
GRMZM2G085051	NA	-2.28022	-3.06607
GRMZM2G066961	universal stress protein	-2.28061	-2.84097
GRMZM2G011140	NA	-2.28527	-1.58528
GRMZM2G068921	NA	-2.29116	-2.85116
GRMZM2G408259	NA	-2.30303	-1.87172
GRMZM2G054154	NA	-2.3064	-2.86921
GRMZM2G394810	NA	-2.30986	-1.30421
GRMZM2G020411	uncharacterized protein LOC100216994	-2.31204	-2.30844
GRMZM2G129540	transposon protein	-2.3208	-2.56136
GRMZM2G092804	unknown	-2.32912	-1.77426
GRMZM2G508161	NA	-2.33563	-1.7594
GRMZM2G370044	plant-specific domain tigr01589 family protein	-2.33598	-1.30147
GRMZM2G488449	NA	-2.33684	-1.67154
GRMZM2G030995	NA	-2.337	-1.3474
GRMZM2G333002	NA	-2.33762	-2.29902
GRMZM2G104783	cytochrome p450	-2.33931	-2.88434
GRMZM2G006112	protein root hair specific 4	-2.34116	-2.35255
GRMZM2G442433	NA	-2.34366	-1.46332
AC203791.3_FG001	NA	-2.34448	-2.30398
GRMZM2G167295	NA	-2.34838	-1.30534
AC186623.5_FG003	NA	-2.34955	-2.36303
GRMZM5G849267	NA	-2.35079	-3.37082
GRMZM2G356465	uncharacterized protein LOC100275500	-2.35397	-1.00048
AC212668.2_FG005	NA	-2.35425	-1.32121
AC214438.3_FG002	NA	-2.35456	-3.07224
GRMZM2G443439	hypothetical protein	-2.3548	-1.35942
GRMZM2G180084	NA	-2.35528	-2.03195
GRMZM2G073842	NA	-2.35581	-1.52501
GRMZM2G089106	18s subunit ribosomal protein	-2.35817	-2.39535
AC213617.4_FG007	NA	-2.3582	-2.31211
AC197362.3_FG004	NA	-2.36078	-2.37224
GRMZM2G302080	atp sulfurylase	-2.36487	-3.35357
GRMZM2G371277	NA	-2.36711	-3.34485
GRMZM2G100965	uncharacterized protein LOC100383220	-2.36714	-1.61566
GRMZM5G833185	NA	-2.36724	-2.26573
GRMZM2G701969	NA	-2.36812	-1.76408
GRMZM2G006895	NA	-2.36844	-2.40824
AC195344.3_FG002	NA	-2.36864	-2.32099
GRMZM2G133870	NA	-2.37017	-2.34933
GRMZM2G039187	iq calmodulin-binding motif family protein	-2.3702	-1.00913
GRMZM5G868959	uncharacterized protein LOC100501031	-2.37032	-1.30756
GRMZM2G132176	NA	-2.37119	-1.33197
GRMZM2G132522	-dihydroxy-3-keto-5-methylthiopentene dioxygenase 4	-2.37528	-1.33448
GRMZM2G141992	protoporphyrinogen oxidase	-2.37569	-2.33222
GRMZM2G322847	NA	-2.37636	-1.33791
AC202432.3_FG006	NA	-2.37649	-1.62706
AC198490.3_FG003	NA	-2.37672	-1.33608
GRMZM5G870251	NA	-2.37688	-2.33284
AC200140.3_FG002	NA	-2.37942	-3.92663
GRMZM2G312985	NA	-2.38495	-1.3916
GRMZM2G086324	NA	-2.39924	-1.2945
AC205470.3_FG008	NA	-2.39968	-1.38959
GRMZM2G058491	atp binding	-2.40045	-1.05577
GRMZM5G820393	protein chup1	-2.40536	-1.80398
GRMZM2G148892	wound responsive protein	-2.41018	-1.38914
GRMZM2G138836	NA	-2.41086	-4.69606
GRMZM2G467902	aldo keto reductase family expressed	-2.4206	-2.54048
AC194457.3_FG001	NA	-2.42696	-1.04112
GRMZM2G114031	NA	-2.42916	-2.38563
GRMZM2G326053	NA	-2.43034	-2.42456
AC194172.3_FG008	NA	-2.4314	-2.40098
GRMZM2G097404	NA	-2.43305	-1.39183
GRMZM2G050434	uncharacterized protein LOC100278109 precursor	-2.43366	-2.41007
GRMZM5G822829	bhlh domain protein	-2.43427	-3.99056
AC216828.3_FG006	NA	-2.43735	-1.39916
GRMZM2G464676	uncharacterized protein LOC100279989	-2.43751	-1.42071
GRMZM2G178693	plasma membrane intrinsic protein	-2.44097	-2.42407
GRMZM5G899260	uncharacterized protein LOC100384513	-2.44817	-2.76619
GRMZM2G131937	myb transcription factor	-2.45458	-1.42712
GRMZM5G857621	NA	-2.45706	-2.02561
GRMZM5G853633	NA	-2.46679	-2.44918
GRMZM2G001161	NA	-2.48512	-1.04367
AC213677.3_FG008	NA	-2.48623	-1.88668
GRMZM2G116037	NA	-2.49621	-3.55983
GRMZM2G456064	NA	-2.51005	-1.15276
GRMZM2G432330	NA	-2.51422	-1.18212
GRMZM2G700573	---NA---	-2.51662	-1.7857
GRMZM2G468574	NA	-2.52117	-2.49191
GRMZM2G509699	NA	-2.52895	-3.48761
GRMZM2G078256	NA	-2.52969	-1.01077
GRMZM2G552194	NA	-2.53237	-2.37307
GRMZM2G502560	unknown	-2.53478	-3.46925
AC184170.4_FG002	NA	-2.53586	-1.52333
GRMZM2G015741	NA	-2.55139	-1.35621
GRMZM2G055999	chloroplast-targeted copper	-2.5537	-1.5331
GRMZM2G001212	NA	-2.55562	-2.53337
GRMZM5G855743	NA	-2.56013	-3.20516
GRMZM2G472087	af361857_1 at2g46220	-2.56554	-1.85938
GRMZM2G451061	NA	-2.56664	-2.54579
GRMZM2G147560	metal transporter	-2.57163	-1.24676
AC208110.2_FG006	NA	-2.57364	-3.02165
GRMZM2G150571	NA	-2.58846	-3.5982
GRMZM2G409321	NA	-2.59899	-1.57332
AC212709.3_FG001	NA	-2.60349	-1.57477
AC186026.3_FG003	NA	-2.60568	-2.56037
GRMZM2G356656	NA	-2.60845	-1.56674
AC205369.3_FG001	NA	-2.61876	-1.59284
GRMZM2G129815	sigma factor binding protein	-2.61886	-4.84485
GRMZM2G311943	NA	-2.62659	-1.04709
GRMZM2G458180	NA	-2.6281	-1.0422
AC202434.3_FG004	NA	-2.64401	-2.6238
GRMZM2G155820	NA	-2.654	-2.61041
AC199217.3_FG002	NA	-2.65436	-2.61484
GRMZM5G874734	NA	-2.66597	-2.63593
GRMZM2G528672	NA	-2.66987	-2.38253
GRMZM2G030265	exopolygalacturonase precursor	-2.67466	-2.63646
GRMZM2G570791	rna polymerase alpha subunit	-2.67504	-2.60034
GRMZM2G099131	NA	-2.68624	-1.06943
GRMZM2G162626	NA	-2.68873	-1.06965
AC213990.3_FG001	NA	-2.69914	-1.50215
GRMZM2G023306	NA	-2.70632	-1.66291
GRMZM2G022941	NA	-2.71209	-3.01729
GRMZM2G352255	NA	-2.72345	-1.14605
GRMZM2G427361	NA	-2.72737	-1.5393
GRMZM2G332882	NA	-2.7393	-2.7191
GRMZM2G473540	NA	-2.74069	-1.95781
GRMZM2G124270	NA	-2.74278	-2.89513
GRMZM2G360519	lysine histidine transporter-like 8-like	-2.7466	-2.67622
GRMZM2G703142	NA	-2.75798	-1.15992
GRMZM2G368047	inhibitor of apoptosis-like protein	-2.76218	-3.74064
GRMZM2G054267	uncharacterized protein LOC100276382 precursor	-2.77948	-4.08802
AC208438.2_FG005	NA	-2.78167	-2.77832
GRMZM2G176047	di-glucose binding protein with kinesin motor domain	-2.7857	-1.26908
GRMZM2G502606	NA	-2.79269	-4.59777
GRMZM2G136850	NA	-2.79939	-1.31418
GRMZM2G146192	probable beta-d-xylosidase 2-like	-2.80446	-3.35039
GRMZM2G562407	NA	-2.81754	-1.24732
GRMZM2G554000	NA	-2.82508	-2.77527
AC208855.3_FG002	NA	-2.82809	-2.0334
GRMZM2G115682	NA	-2.83275	-2.80203
AC208082.3_FG003	NA	-2.83954	-1.80364
GRMZM5G801278	NA	-2.84832	-2.80625
GRMZM2G480986	NA	-2.85214	-2.83141
AC212406.3_FG002	NA	-2.85479	-2.8535
GRMZM2G351239	uncharacterized protein LOC100276595	-2.86	-1.50043
[truncated: 88 more rows]

## Sheet: e
Gene ID	Discription	log2 (FC) 6 WW Sys	log2 (FC) 6 WW Loc	log2 (FC) 6 WO Loc
GRMZM2G449257	protein	-1.01652	-1.38639	-1.0295
GRMZM2G068557	ferric reductase-like transmembrane component	-1.02872	-2.07609	-2.99094
GRMZM2G044070	anthocyanidin -o-glucosyltransferase-like	-1.0461	-1.40501	-1.71378
GRMZM2G136960	lhc-related protein	-1.12737	-2.06015	-2.24135
GRMZM2G148800	oligopeptide transporter	-1.13909	-1.71861	-1.14394
GRMZM2G139834	auxin-induced protein	-1.15026	-2.46642	-2.24439
GRMZM2G014009	uncharacterized protein LOC100276205	-1.395	-1.9537	-1.14511

## Sheet: f
Gene ID	Discription	log2 (FC) 6 WW Sys	log2 (FC) 6 WW Loc	log2 (FC) 6 WO Sys	log2 (FC) 6 WO Loc
GRMZM2G362848	uracil transporter-like protein	-1.01333	-1.03016	-1.18159	-2.28711
GRMZM2G034471	cytochrome p450	-1.07331	-2.85025	-1.33043	-4.47637
GRMZM2G355752	early light-induced protein	-1.11908	-1.01709	-1.23575	-2.02869
GRMZM2G136081	plant-specific domain tigr01615 family protein	-1.12909	-1.22294	-1.27059	-1.80146
GRMZM2G176748	senescence-associated protein sag102	-1.14189	-1.23573	-1.26587	-1.02809
GRMZM2G051984	protein	-1.14367	-1.15221	-1.30683	-1.03856
GRMZM2G084116	NA	-1.2888	-1.91333	-1.2505	-2.99288
GRMZM2G038931	uncharacterized protein LOC100276373	-1.33037	-1.20474	-1.42101	-1.47175
GRMZM2G093032	vacuolar processing enzyme 4	-1.4226	-2.94963	-1.11166	-3.50165
GRMZM2G111760	protein	-1.47011	-2.64818	-1.65892	-1.62316
GRMZM2G057413	transcription factor org2-like	-1.99768	-1.58502	-1.14536	-1.54864

## Sheet: g
Gene ID	Discription	log2 (FC) 6 WW Sys	log2 (FC) 6 WW Loc	log2 (FC) 6 WO Sys
GRMZM2G175995	auxin regulated gene involved in organ size 5	-1.32655	-1.29457	-1.19124
GRMZM2G178074	phosphoenolpyruvate carboxylase kinase 1	-1.70295	-1.16251	-1.44523
GRMZM2G106393	wound induced protein	-2.25569	-1.39233	-1.76005

## Sheet: h
Gene ID	Discription	log2 (FC) 6 WW Sys	log2 (FC) 6 WW Loc
GRMZM2G135044	mtn21-like protein	-1.04457	-1.06897
GRMZM2G124890	histidine-containing phosphotransfer protein 4-like	-1.07134	-1.05756

## Sheet: i
Gene ID	Discription	log2 (FC) 6 WW Sys	log2 (FC) 6 WO Loc
GRMZM2G134888	vacuolar amino acid transporter 1-like	-1.06064	-1.10272
GRMZM2G072052	calcium-binding protein cml15	-1.19402	-1.06846
GRMZM2G444541	ribosomal protein s15	-2.29271	-1.44662
GRMZM2G335564	nadh-plastoquinone oxidoreductase subunit 7	-2.30687	-1.21548

[truncated: 6 more sheets: j, k, l, m, n, O]
